# Supplementary material for: The switch-like expression of heme-regulated kinase 1 mediates neuronal proteostasis following proteasome inhibition
Source: eLife. 2020 Apr 24;9:e52714. doi: 10.7554/eLife.52714 (PMC7224698; doi:10.7554/eLife.52714)
Supplement: Figure 1—figure supplement 1—source data 1. [file elife-52714-fig1-figsupp1-data1.xlsx]

## Sheet: A
		Experiment 1
Time [s]	0	120	240	360	480	600	720	840	960	1080	1200	1320	1440	1560	1680	1800	1920	2040	2160	2280	2400	2520	2640	2760	2880	3000	3120	3240	3360	3480	3600	3720	3840	3960	4080	4200	4320	4440	4560	4680	4800	4920	5040	5160	5280	5400	5520	5640	5760
Control	125	170	246	359	487	652	822	1048	1297	1571	1850	2149	2446	2756	3057	3366	3673	3961	4263	4571	4850	5154	5413	5738	6005	6271	6561	6855	7083	7364	7614	7899	8128	8411	8630	8906	9108	9365	9577	9856	10040	10285	10503	10765	10964	11153	11376	11593	11769
Control	128	164	224	312	417	549	713	931	1165	1420	1697	1989	2290	2592	2884	3191	3493	3790	4134	4446	4811	5118	5424	5792	6065	6418	6731	7029	7340	7649	7953	8238	8566	8809	9119	9373	9677	9971	10207	10480	10725	10976	11217	11522	11693	11930	12189	12369	12609
Control	73	90	116	153	201	258	336	421	518	628	741	860	989	1114	1244	1389	1527	1674	1822	1950	2105	2233	2380	2526	2655	2793	2942	3068	3213	3358	3470	3607	3736	3869	3977	4114	4225	4341	4463	4567	4691	4813	4897	5035	5134	5249	5308	5431	5533
Control	69	84	104	129	168	212	272	341	426	527	630	742	869	993	1118	1255	1391	1539	1692	1844	1993	2151	2305	2458	2623	2782	2936	3084	3233	3389	3537	3690	3822	3989	4126	4280	4416	4564	4687	4846	4972	5108	5237	5362	5487	5629	5760	5876	5996
Lacta 2h	63	67	63	62	59	67	60	65	65	70	69	72	73	77	81	84	87	89	93	99	103	105	110	117	120	121	131	133	140	145	150	155	157	166	171	180	184	192	197	203	207	217	223	229	237	240	250	255	262
Lacta 2h	59	59	57	56	59	57	62	61	60	61	66	67	70	72	76	74	83	85	86	90	92	98	100	105	109	113	117	119	125	132	138	140	144	149	157	157	163	170	174	178	185	191	197	199	207	215	221	225	230
Lacta 2h	47	50	49	50	47	47	46	49	49	52	52	52	52	53	53	54	58	58	59	60	63	62	67	69	70	72	74	74	80	83	85	86	91	91	93	96	97	102	103	105	110	113	114	122	120	121	127	130	133
Lacta 2h	56	53	54	49	50	50	51	53	55	52	52	56	59	59	58	60	56	61	64	64	65	70	69	70	74	76	79	80	82	86	88	90	93	95	91	100	102	108	108	112	112	118	118	121	122	128	130	133	136
		Experiment 2
Time [s]	0	120	240	360	480	600	720	840	960	1080	1200	1320	1440	1560	1680	1800	1920	2040	2160	2280	2400	2520	2640	2760	2880	3000	3120	3240	3360	3480	3600	3720	3840	3960	4080	4200	4320	4440	4560	4680	4800	4920	5040	5160	5280	5400	5520	5640	5760
Control	175	277	461	747	1136	1592	2101	2681	3280	3885	4508	5116	5716	6295	6879	7438	7969	8501	8910	9383	9838	10206	10647	11032	11381	11736	12085	12369	12643	12927	13104	13368	13637	13807	14050	14217	14470	14606	14764	14927	15076	15264	15277	15376	15546	15616	15789	15815	15915
Control	134	233	406	670	1038	1499	2043	2633	3305	3938	4628	5293	5970	6598	7232	7855	8395	8958	9491	9992	10455	10960	11368	11782	12197	12553	12951	13296	13569	13886	14197	14473	14761	15019	15231	15481	15699	15849	16020	16230	16347	16580	16738	16796	16935	17075	17190	17292	17372
Control	123	227	412	691	1080	1549	2087	2707	3365	3983	4683	5337	5969	6617	7202	7784	8332	8871	9326	9783	10285	10646	11098	11457	11803	12179	12498	12762	13093	13342	13588	13895	14088	14348	14534	14722	14913	15052	15267	15417	15544	15697	15809	15962	16046	16155	16258	16348	16388
Control Average	144	214.25	379.75	617	933.5	1310	1737.75	2215.25	2727.5	3221.5	3754.75	4266.5	4773.75	5267.5	5748.25	6219.25	6654	7092.5	7471.75	7859.5	8244.5	8583	8938.25	9257.75	9565.25	9867	10163.5	10416.8	10666.2	10908.8	11122.2	11364	11581.5	11783.5	11973.8	12155	12350.5	12486.8	12652.8	12813.5	12941.8	13115.2	13216	13323.5	13451.8	13561.5	13689.2	13773.8	13858.8
Control Devest	27.4044	27.3008	30.1717	39.8037	49.1664	46.5439	30.2655	37.5411	43.6845	49.0544	89.4893	116.98	146.359	180.672	195.72	223.102	229.933	242.665	299.4	309.452	318.695	378.751	364.267	376.109	408.08	408.985	433.154	465.284	463.061	480.944	547.69	552.696	565.642	607.161	593.693	636.239	622.426	629.705	632.133	658.139	642.816	670.7	739.435	713.6	703.52	737.745	713.137	747.97	743.285
Lacta
Lacta 2h	43	43	41	39	41	43	46	55	63	75	89	105	124	145	165	188	215	242	268	298	325	356	390	424	452	491	523	563	606	646	692	737	779	817	858	896	938	977	1018	1058	1104	1149	1188	1225	1283	1319	1364	1409	1461
Lacta 2h	30	32	30	29	32	35	37	44	49	60	73	87	101	117	135	151	170	193	209	230	255	278	301	324	353	378	404	429	454	480	501	530	556	584	610	637	662	692	722	753	779	813	841	872	901	931	962	996	1020
					Slopes		Average Slopes
					Control	20uM Lacta 2h	Control	20uM Lacta 2h
				Biological Replicate 1	1.44	0.058	1.01429	0.110487
				Biological Replicate 2	1.54	0.049	0.329487	0.110487
				Biological Replicate 3	0.75	0.027				Paired t test
				Biological Replicate 4	0.87	0.028				P value	0.0023
				Biological Replicate 5	0.8	0.28				P value summary	**
				Biological Replicate 6	0.89	0.22
				Biological Replicate 7	0.81
[truncated: 95 more columns]

## Sheet: B
Control	PI
57.601	20.875
62.451	21.489
65.683	21.323
71.081	19.458
70.917	10.117
53.685	8.453		5 independendent Experiments pooled
60.076	8.467
57.955	10.169
46.117	21.352
36.548	9.984
64.931	9.222
74.602	8.655
81.709	9.741
71.778	10.296			Unpaired t test
60.184	10.44			P value	< 0,0001
58.343	16.264			P value summary	****
66.479	25.466
84.588	12.569
64.16	15.103
54.092	12.807
53.847	14.884
58.59	11.196
54.779	11.413
61.581	9.005
55.521	13.406
58.254	9.579
56.967	17.286
47.613	13.764
58.171	11.634
70.892	11.166
60.351	19.288
70.695	8.829
78.045	13.831
57.004	19.053
61.326	11.998
55.508	7.925
55.349	7.566
71.23	13.527
78.66	9.705
53.688	11.125
88.886	13.508
69.41	12.736
68.222	18.22
67.681	9.184
62.873	10.215
64.515	12.457
56.519	6.512
58.961	11.172
34.024	15.36
49.033	21.056
54.759	12.75
81.749	17.286
41.109	19.626
62.023	15.794
64.126	15.445
66.28	15.267
68.538	15.343
65.232	16.962
75.015	15.952
67.215	10.597
66.492	12.559
47.573	11.02
55.364	8.74
57.423	9.131
51.189	20.203
42.465	8.518
47.178	21.066
55.693	8.1
43.381	18.596
41.62	14.345
63.849	34.323
48.982	31.595
47.184	18.966
59.035	18.608
51.62	12.794
45.538	8.881
73.358	15.832
42.229	19.238
63.204	13.193
74.488	7.73
83.634	15.964
73.12	12.506
77.455	13.645
88.592	16.595
57.073	19.001
53.904	7.785
56.808	7.008
79.559	8.033
72.16	13.6
44.5	17.986
62.036	11.195
49.312	19.269
60.462	14.982
66.478
77.265	16.922
82.403	32.666
76.01	17.724
66.807	13.583
64.466	12.234
49.404	17.23
37.542	9.967
62.812	24.627
69.678	31.174
	17.24
99.57	32.709
91.813	17.87
87.952	19.303
80.333	20.47
93.944	15.475
63.262	13.315
68.097	28.557
93.867	26.009
89.443	8.045
78.433	17.457
78.163	13.563
87.551	13.736
68.579	11.449
81.602	24.673
108.191	23.327
99.033	8.389
73.983	16.667
82.539	8.69
75.574	6.869
67.531	18.953
67.933	18.527
64.166	27.319
92.595	11.148
72.153	13.753
79.012	14.201
73.96	15.924
68.427	22.595
73.498	13.461
67.492	11.872
66.242	39.977
69.076	23.794
82.296	14.529
70.409	25.858
62.194	30.939
76.397	18.573
82.748	19.059
72.743	9.906
79.98	17.512
77.462	20.675
61.907	18.383
66.968	39.131
70.195	20.992
66.521	12.974
77.473	12.309
65.271	11.799
104.294	13.028
89.418	19.852
106.412	28.408
74.829	16.06
71.267	38.243
89.493	29.964
68.711	32.193
77.624	12.537
68.375	14.893
70.198	19.412
58.359	13.564
87.069	15.509
71.364	18.532
58.477	21.048
48.749	24.308
50.339	11.45
92.72	27.694
77.787	23.038
85.885	34.705
72.175	18.291
70.243	7.787
67.402	20.901
51.071	19.714
53.118	40.294
67.379	18.631
58.591	26.207
64.979	24.212
66.37	23.029
70.957	34.305
73.739	21.025
67.17	23.802
80.571	18.438
40.888	10.8
46.055	15.766
49.879	17.756
42.287	20.991
45.261	16.392
52.722	36.964
43.288	16.718
91.557	30.656
78.511	45.961
71.234	21.713
73.51	15.388
87.218	18.567
77.063	35.959
84.416	29.448
73.853	18.519
65.906	14.982
104.781	29.827
83.47	40.383
111.784	18.624
78.766	13.507
60.91	10.064
94.914	29.203
55.644	15.41
72.316	16.577
76.665	12.472
61.889	10.402
45.897	9.259
61.507	10.743
55.632	20.445
74.068	13.666
61.936	20.847
83.198	27.624
49.18	22.236
56.247	32.638
72.937	17.984
24.784	18.859
68.911	11.24
66.517	17.287
62.557	10.025
59.023	7.295
57.644	18.556
69.353	17.1
61.851	12.003
94.38	16.361
87.548	14.119
90.264	11.425
88.447	9.858
70.139	7.569
56.445
80.404	17.104
39.648	14.343
51.082	14.336
52.388	11.226
55.57	19.028
55.017	22.53
52.071	28.135
	38.936
107.829	37.382
71.228	40.676
79.424	13.412
84.299	40.506
83.954	12.248
71.869	23.88
69.48	16.523
73.064	18.802
81.484	11.672
102.274	31.786
77.142	22.307
68.058	15.491
66.716	15.978
57.537	11.455
78.526	21.07
75.058	14.805
69.649	20.252
62.222	20.375
49.863	12.514
52.742	9.734
64.933	7.468
52.455	17.21
59.567	13.122
76.212	15.772
60.902	12.735
59.401	8.271
60.468	9.064
53.027	9.391
63.817	10.024
57.412	14.775
47.689	17.549
47.391	23.67
44.825	13.831
45.092	14.225
74.899	21.811
74.807	17.173
52.412	21.519
63.365	10.973
53.777	26.054
48.059	21.914
37.779	19.724
49.249	13.015
53.831	16.137
57.567	8.624
58.902	13.442
45.097	25.335
43.966	19.067
60.272	16.226
36.225	6.823
37.767	10.962
35.133	15.311
44.856	16.18
58.628	15.064
47.491	21.07
47.357	26.28
37.555	20.654
51.386	23.279
48.452	13.423
46.306	16.483
46.773	11.858
53.343	15.11
52.942	11.988
43.83	15.307
61.447	11.078
37.083	14.729
39.548	10.629
41.972	11.07
43.112	14.909
57.569	16.445
48.052	9.937
44.734	14.605
92.556	15.453
109.929	10.748
67.365	6.409
81.747	10.062
59.883	18.989
94.088	14.399
53.235	22.152
63.905	18.751
64.404	17.731
52.149	12.748
70.708	9.18
70.415	14.084
70.999	14.127
73.583	10.227
78.697	12.336
47.816	14.741
75.471	16.933
65.505	12.164
73.128	16.185
58.284	15.093
92.674	14.089
62.042	12.877
78.747	6.267
78.747	6.845
70.286	7.763
74.996	11.281
63.669	13.53
57.572	7.152
57.074	15.046
63.413	13.542
53.218	12.778
40.134	15.5
60.047	18.925
54.753	7.646
50.333	16.992
64.234	8.051
49.376	18.417
59.693	13.398
58.676	11.744
39.122	14.094
48.992	9.236
50.253	7.552
57.639	13.251
67.088	13.894
80.447	21.098
52.06	17.299
59.335	10.154
54.072	5.079
44.408	23.092
66.676	7.838
53.91	11.36
58.483	18.926
48.021	9.123
51.288	18.505
49.832	15.506
65.483	13.951
60.774	17.343
39.587	12.956
48.159	17.61
66.09	15.921
60.599	9.177
50.573	14.438
57.706	17.672
40.87	11.637
43.016	12.773
40.519	20.269
43.375	10.48
35.151	18.591
43.228	13.102
48.248	6.565
40.315	9.401
46.378	8.627
43.742	11.803
49.76	20.689
60.039	10.642
44.155
38.069	19.489
41.867	17.994
36.556	21.882
39.73	25.283
61.829	22.704
48.741	16.885
36.965	15.235
59.51	34.906
52.272	14.928
49.872	6.233
59.533	5.657
33.23	11.58
38.2	15.034
41.89	20.913
31.498	24.981
38.974	18.132
45.412	21.93
39.631	11.081
37.793	8.635
41.792	20.224
51.424	16.074
44.752	18.264
42.23	19.701
39.524	21.058
49.24	20.584
31.688	14.673
38.218	10.871
38.952	7.626
33.431	24.264
26.401	14.816
38.227	16.81
42.62	16.394
32.713	16.794
32.909	25.135
31.358	13.592
31.52	10.726
33.764	6.268
35.856	19.047
32.199	17.963
23.56	14.735
29.878	6.257
31.314	11.7
36.092	20.633
32.155	14.179
27.955	21.514
38.208	7.973
31.863	13.523
31.694	11.819
33.832	10.665
51.915	16.529
48.592	16.524
47.948	9.852
42.888	15.919
42.401	17.136
52.348	22.24
33.88	14.489
38.161	8.648
39.171	7.331
39.171	14.51
39.171	16.256
39.816	15.005
45.056	11.046
37.761	16.845
33.077	17.392
40.69	21.003
30.033	21.612
31.145	25.062
33.79	13.243
29.012	14.643
32.959	19.958
44.859	13.112
32.579	9.686
32.519	9.812
36.807	26.034
26.185	9.66
26.065	14.692
33.48	21.126
	17.123
42.665	15.86
41.414	14.589
42.758	13.02
35.984	15.334
43.241	4.892
38.077	13.322
50.92	16.51
23.735	21.535
36.83	19.152
39.955	17.022
41.344	19.363
46.935	18.658
34.85	15.508
49.049	27.346
33.218	18.814
33.424	36.122
49.849	23.099
35.699	10.621
36.329	9.052
40.525	22.045
36.696	16.371
38.831	18.028
39.158	13.517
35.95	17.581
35.894	26.685
35.149	16.784
35.264	12.805
34.78	20.732
33.024	11.315
31.383	14.61
41.515	19.582
43.763	17.574
47.027	17.036
41.445	7.392
44.653	9.968
46.518	7.459
41.2	17.546
34.323	21.4
44.645	17.783
51.591	10.375
33.032	18.424
35.233	19.907
40.902	23.801
34.966	11.448
40.026	11.67
27.627	8.828
35.075	21.593
34.692	12.962
36.585	8.906
22.982	16.791
32.572	18.751
30.285	12.007
24.982	26.847
36.51	18.515
26.122	11.788
30.686	20.416
34.016	21.442
26.497	8.834
31.329	15.553
38.52	15.968
49.394	20.116
44.765	15.193
51.491	9.098
42.807	16.413
42.485	14.246
44.172	17.192
41.261	10.485
36.847	21.552
40.331	11.715
42.149	15.11
34.734	16.108
30.439	27.138
38.061	20.539
52.975	13.542
40.358	13.973
25.663	12.32
44.071	16.672
38.982	16.859
27.791	27.806
24.886	13.175
48.849	9.547
48.321	10.407
47.608	12.71
60.521	11.93
55.046	16.501
41.41	24.466
37.514	26.11
38.496	20.254
43.156	12.717
42.94	12.786
48.655	28.935
45.505	10.45
45.505	9.737
44.453	8.719
44.453	7.211
41.588	5.838
44.476	6.572
45.862	11.745
36.502	4.388
33.307	9.158
34.646	12.009
30.773	9.65
36.911	8.182
36.997	7.129
56.619	15.603
59.759	29.87
45.538	13.31
46.34	21.992
55.267	11.101
58.35	12.871
52.933	11.195
45.865	22.642
41.724	13.387
51.504	16.63
53.505	45.432
35.398	28.309
38.906	21.725
54.397	22.118
57.582	23.935
51.89	21.996
55.664	16.436
52.016	41.162
50.818	24.325
45.763	18.309
42.605	12.16
39.268	13.936
37.818	23.897
27.675	21.348
52.74	29.433
55.478	19.682
47.406	5.356
41.622	13.605
41.016	27.274
36.358	11.936
47.429	14.342
34.202	20.265
30.873	18.249
37.692	19.286
46.675	18.894
41.314
40.291	9.691
29.842	18.992
41.301	12.155
35.209	6.467
34.306	20.067
34.063	3.148
34.169	18.696
34.921	15.717
38.803	3.893
34.068	9.903
42.382	6.043
52.213	4.654
31.019	11.297
45.507	4.102
31.78	5.798
47.63	6.855
35.19	6.785
35.983	6.864
44.97	9.568
38.461	8.817
44.457	6.565
41.109	8.799
34.518	5.144
19.293	2.843
36.401	11.405
42.332	8.074
44.098	8.495
39.4	13.044
46.645	5.005
43.5	8.143
50.369	7.349
42.056	7.588
48.532	5.036
33.06	7.355
44.004	5.333
35.703	4.055
48.374	5.314
57.051	5.417
36.695	7.745
52.42	3.87
46.602	4.22
41.295	8.455
42.205	7.666
55.289	7.233
43.261	10.908
47.49	6.642
38.419	8.866
41.797	4.665
38.531	3.189
43.392	19.061
41.033	16.315
43.247	5.487
40.398	6.475
38.487	12.653
41.385	5.921
49.302	10.643
42.696	6.332
42.079	12.565
48.307	6.111
47.37	14.502
35.46	15.567
37.517	8.026
21.201	14.3
62.499	10.042
74.085	10.649
77.585	7.451
54.882	19.95
96.541	8.61
67.366	12.104
57.591	10.833
77.776	4.586
60.173	3.203
57.841	13.052
55.066	4.506
58.834	11.262
61.421	5.011
61.717	3.603
54.559	11.471
45.45	8.398
20.565	6.585
26.316	10.08
72.585	10.501
90.538	4.252
66.848	4.735
74.129	15.342
72.4	4.01
66.938	14.538
53.789	14.572
17.216	10.009
25.549	10.198
65.718	5.581
88.626	13.464
57.627	5.778
65.793	9.762
83.631	9.29
95.442	16.377
72.251	19.496
59.05	9.454
67.699	12.45
69.784	6.72
92.144	17.145
67.533	8.309
51.256	13.19
57.652	5.286
78.957	10.484
60.934	21.029
39.513	9.752
50.357	5.373
57.516	10.846
40.819	10.915
37.661	5.438
64.061	9.94
49.499	13.993
48.434	3.015
42.063	12.322
47.73	7.4
49.32	5.952
58.492	8.647
45.885	14.63
51.618	5.381
52.677	9.022
50.662	8.056
40.311	4.773
50.96	5.341
54.553	5.719
45.841	4.167
54.513	9.711
	7.589
35.769	4.733
41.711	6.095
45.954	7.918
35.408	4.484
39.803	10.942
40.257	6.461
43.599	6.244
35.088	7.774
36.395	6.218
56.61	11.651
44.504	6.484
42.244	3.537
28.953	6.785
40.013	5.899
36.244	10.782
32.825	16.559
23.448	7.058
35.397	4.674
27.901	16.386
15.652
34.488	5.071
28.569	4.368
37.001	3.299
25.835	5.918
23.872	6.124
44.493	2.625
28.654	2.733
23.774	3.587
33.936	5.006
35.172	2.394
24.937	3.311
28.367	2.376
30.342	2.608
30.999	3.837
24.295	3.606
36.385	5.466
22.643	14.074
24.495	5.161
19.005	2.021
26.19	1.885
24.194	5.016
27.03	1.77
44.143	19.064
25.018	6.027
26.362	3.558
25.958	6.39
41.199	4.117
37.957	2.564
45.782	2.844
37.747	11.012
34.164	4.386
48.91	5.332
43.045	6.396
40.435	7.425
39.75	9.228
37.718	3.508
14.871	3.892
31.311	3.51
15.205	4.129
31.966	9.766
30.127	12.238
17.27	3.765
26.07	8.168
33.119	3.996
35.811	12.156
26.891	3.142
27.675	12.54
34.335	5.887
30.536	2.814
26.237	5.538
27.307	7.799
33.702	3.772
31.625	5.868
24.555	14.023
24.391	5.358
26.999	2.878
29.384	10.705
30.236	7.101
33.287	5.593
29.329	8.066
29.164	3.582
25.226	8.709
27.981	5.837
36.102	4.014
30.37	9.312
15.049	5.967
14.634	16.179
41.607	7.457
52.378	13.295
29.057	6.291
40.547	7.219
38.489	3.06
33.295	9.141
35.786	8.336
41.234	13.131
43.023	4.743
20.857	5.94
33.013	17.309
39.86	4.128
38.281	14.561
15.667	19.978
20.924	18.021
39.062	7.634
41.58	2.341
53.256	2.011
34.215	7.041
36.824	5.987
27.938	2.006
37.586	2.692
24.001	3.952
23.487	4.343
25.76	5.417
31.595	4.616
32.696	4.309
28.889	1.859
35.545	1.884
42.251	3.138
26.286	5.941
34.598	16.949
31.917	12.014
26.62	7.923
26.009	24.065
22.476	19.209
26.721	10.455
25.263	5.324
38.102	13.473
33.267	6.311
28.778	12.544
29.187	22.402
35.176	9.39
29.495	5.483
21.215	6.256
30.274	7.945
34.716	4.519
42.112	1.878
36.227	6.568
32.233	6.973
27.504	6.125
24.474	2.029
28.517	5.904
16.681	6.604
22.46	6.21
31.223	5.631
40.407	6.687
30.275	5.384
36.534	8.738
36.218	4.518
33.942	2.044
26.044	4.365
38.166	2.391
36.587	3.728
37.046	3.512
27.681	8.563
42.531	6.164
42.711	6.646
36.631	9.438
42.441	5.32
43.237	7.395
29.462	3.311
37.818	4.947
29.876	5.644
36.791	5.283
27.333	7.569
31.182	2.958
29.421	3.565
30.123	3.058
49.122	4.24
32.816
27.766	23.319
9.133	15.434
28.48	7.115
31.37	10.757
25.666	12.851
56.398	11.923
40.943	14.584
39.907	14.77
47.934	8.546
56.438	13.246
32.463	5.963
26.985	14.09
49.732	16.227
42.051	13.271
32.887	16.614
35.386	10.064
30.152	7.106
43.319	6.583
34.592	15.146
28.327	7.833
46.585	9.665
8.561	10.759
41.34	9.799
35.941	6.608
37.23	8.548
52.1	10.327
40.931	10.348
33.596	16.317
33.37	7
33.877	13.169
39.762	15.242
29.131	17.329
41.402	6.992
36.631	6.91
39.28	12.798
28.745	5.919
37.975	12.836
40.848	13.295
35.029	16.305
35.475	10.945
36.544	7.826
34.368	15.343
39.549	11.806
27.574	9.563
37.681	11.806
25.581	8.885
24.988	9.275
36.763	10.765
33.723	5.059
29.651	5.945
28.268	5.984
8.755	20.934
	18.911
32.94	16.196
31.024	21.257
28.9	7.476
34.472
28.204	6.391
30.859	9.005
31.353	12.281
34.433	7.313
26.537	5.007
30.768	8.404
31.045	4.109
32.518	6.306
31.807	5.124
23.458	9.574
29.611	3.008
31.104	13.903
32.575	10.017
27.286	10.145
35.581	8.004
35.638	11.203
38.699	14.861
35.124	12.999
41.618	12.384
31.517	18.514
39.614	17.648
32.562	7.376
31.254	8.239
36.053	14.909
34.502	6.913
34.425	7.09
41.282	6.339
31.127	5.909
29.794	4.72
38.18	5.997
28.435	3.259
34.61	6.635
38.865	10.18
32.789	11.964
27.87	5.141
26.574	10.18
11.097	8.774
13.506	5.768
43.429	9.157
40.507	11.654
43.689	5.899
37.44	10.566
36.03	12.381
37.416	9.486
34.522	7.288
38.723	11.388
40.577
27.142	8.294
27.837	11.075
31.663	4.895
39.048	4.455
29.483	10.723
29.417	10.649
37.457	7.153
40.741	3.969
34.007	6.401
27.132	10.565
22.785	7.908
19.39	9.053
24.296	7.817
32.17	4.775
37.936	8.063
37.462	7.588
33.616	4.647
35.491	9.215
22.742	7.875
45.984	10.604
34.515	9.44
23.607	11.539
32.077	6.782
33.564	9.341
30.02	10.362
29.713	8.857
28.055	9.874
26.812	8.792
25.255	7.439
31.295	3.809
21.222	8.238
37.129	6.539
37.542	10.769
36.399	7.634
31.917	8.411
25.242	5.303
34.033	6.786
30.271	3.794
38.621	14.429
30.742	8.419
38.744	6.075
36.52	4.272
33.761	4.014
27.404	1.724
31.295	5.099
41.59	4.058
30.768	8.579
33.294	6.489
32.239	6.023
28.024	4.021
31.284	7.553
21.307	4.854
29.488	5.791
31.135	17.125
23.917	6.004
24.774	5.864
24.758	7.59
27.967	7.549
30.771	3.344
20.238	7.385
20.547	5.709
23.065	5.344
22.522	2.894
22.753	8.551
27.926	10.077
22.722	7.109
26.342	6.71
25.323	5.683
22.927	2.759
30.83	10.102
23.254
23.395	11.011
19.022	7.824
24.239	10.945
25.288	8.591
22.575	9.055
21.82	8.499
21.258	6.614
17.958	9.275
31.988	7.74
26.213	5.517
21.775	5.22
34.227	8.646
23.275	9.461
19.729	8.31
26.199	6.459
26.718	10.009
23.078	5.64
20.499	9.753
24.949	9.739
21.819	14.724
21.99	7.725
25.526	9.241
24.407	13.926
25.738	6.957
25.653	6.294
28.77	7.042
22.786	8.061
21.667	7.739
16.342	10.397
31.932	10.118
31.437	9.454
25.31	14.766
22.812	7.545
34.583	8.193
33.215	3.666
33.288	2.415
30.614	5.162
24.293	6.348
31.947	7.934
30.122	9.179
42.538	3.667
30.061	6.07
33.079	4.522
31.294	5.522
31.797	10.648
36.24	7.051
29.002	13.014
39.941	15.639
33.083	9.988
26.493	5.124
28.609	9.457
32.164	8.964
29.767	7.502
29.17	7.107
29.155	4.61
25.262	4.308
21.974	2.046
22.234	8.804
24.785	8.102
26.764	7.268
43.681	10.935
40.297	7.474
28.734	6.899
27.999	7.421
25.07	8.158
22.561	6.753
20.74	5.197
31.546	5.548
32.698	6.286
31.548	2.838
32.894	5.252
28.646	8.535
25.937
19.84
21.855
31.342
31.175
38.64
25.134
34.466
34.944
23.642
31.426
28.344
32.742
17.054
9.552
38.726
38.6
32.858
28.235
33.008
30.866
33.287
34.233
30.599
27.043
37.951
31.699
24.314
32.527
30.825
20.356
53.755
30.283
46.453
38.682
36.58
37.416
39.331
42.146
30.319
25.915
34.419
39.483
31.182
37.387
23.77
29.118
28.665
29.149
37.684
32.181
23.543
27.631
25.784
29.11
31.808
32.553
29.665
30.599
33.435
26.288
25.414
36.606
24.376
29.955
28.423
32.661
29.054
30.879
24.936
26.146
27.265
27.104
33.542
27.759
28.076
40.367
31.479
36.871
46.454
41.534
39.743
37.482
32.023
38.352
29.353
31.787
33.475
33.145
40.241
38.093
40.486
42.103
35.571
38.74
45.098
40.257
41.687
39.713
40.852
30.285
27.168
31.887
16.861
35.01
31.68
19.857
32.949
27.066
36.09
32.754
31.433
35.526
23.424
37.736
33.443
34.399
51.1
29.109
5.861
38.496
30.866
26.89
37.689
31.631
29.414
37.119
41.341
33.067
26.904
34.438
23.188
35.792
34.515
32.957
22.074
32.196
23.925
33.24
30.173
36.551
33.394
36.494
24.044
34.426
29.176
37.73
33.101
33.257
24.233
23.304
30.044
39.7
43.891
32.337
28.034
36.806
32.622
53.381
30.454
36.268
43.165
26.995
45.694
34.845
37.584
30.905
30.658
45.556
40.93
35.464
37.173
39.683
31.776
34.997
46.631
33.615
32.838
34.332
34.701
34.471
53.659
36.771
44.18
42.038
51.747
32.327
39.751
54.886
36.417
42.669
27.312
34.441
35.872
27.05
27.329
40.998
38.08
39.288
30.412
35.445
33.06
39.994
36.868
40.102
37.101
28.391
30.075
28.664
37.227
36.138
36.376
35.344
27.803
24.68
31.087
33.345
26.114
33.425
35.491
32.934
41.64
33.443
32.784
34.805
32.11
28.173
31.748
26.573
27.831
27.144
25.57
28.776
22.448
49.314
51.98
37.639
48.309
39.106
46.532
36.572
39.026
30.765
37.169
28.457
41.456
37.422
35.982
42.846
34.634
39.813
30.651
45.37
34.956
33.371
49.603
39.395
38.577
43.624
51.486
39.45
38.931
33.754
19.45
28.977
32.71
46.073
41.233
24.568
32.922
34.997
28.742
24.007
27.563
29.164
26.638
21.711
26.01
26.449
34.765
26.271
29.708
25.136
24.347
30.061
23.688
20.84
28.001
33.768
25.646
20.796
26.729
17.519
18.834
32.54
27.51
22.758
24.47
34.406
31.564
27.477
25.873
29.15
27.023
26.162
25.168
30.665
22.002
26.565
25.401
23.325
32.323
32.991
29.526
28.416
27.411
30.791
19.794
20.434
24.396
30.077
35.227
23.577
45.167
26.44
23.068
35.496
27.614
26.58
34.654
32.126
38.794
31.676
30.213
29.959
26.324
29.731
31.357
22.244
25.713
24.891
40.038
16.894
16.519
33.341
24.816
21.078
30.221
28.809
21.667
36.378
27.877
37.375
28.299
27.604
22.185
42.576
29.387
23.972
23.644
25.729
21.653
24.994
26.435
40.231
34.02
43.423
37.218
42.087
34.815
33.589
44.587
30.652
38.327
35.852
32.013
30.731
33.461
26.29
40.812
26.626
35.845
26.829
4.965
48.994
42.257
46.303
53.43
31.325
27.649
54.817
40.132
40.412
52.726
49.779
40.223
34.081
38.78
33.564
36.821
39.182
35.607
33.61
47.527
47.452
38.537
49.219
41.725
32.9
30.164
70.577
47.052
48.999
36.298
36.393
43.618
38.466
34.656
33.659
26.716
42.865
43.798
25.722
26.587
43.509
35.193
30.678
37.826
31.396
39.012
36.606
41.914
44.269
39.143
33.264
32.302
23.728
46.447
28.984
30.393
30.742
28.508
46.853
33.56
36.162
18.919
26.558
32.708
38.834
28.945
36.049
29.737
31.221
30.431
42.444
34.027
26.967
26.26
30.179
34.552
20.583
18.895
32.873
37.222
34.489
25.992
22.052
29.227
30.364
20.443
14.237
38.85
33.485
26.502
24.616
27.405
32.068
31.131
33.313
32.626
21.858
26.673
21.036
24.922
37.714
36.91
35.633
26.107
61.313
41.108
32.046
41.525
23.602
37.617
30.476
32.19
25.263
53.991
36.62
56.949
48.646
40.094
36.893
64.818
58.49
55.72
51.139
67.285
25.513
31.447
44.345
16.69
53.267
30.744
49.578
34.516
25.395
53.318
32.1
42.844
48.918
39.577
50.07
36.973
34.989
50.803
31.84
28.582
29.121
34.777
43.522
41.253
45.619
27.321
39.048
31.217
23.164
37.383
44.282
28.834
35.056
46.463
27.326
41.071
44.673
25.859
35.27
37.469
41.329
37.078
31.734
28.475
14.01
35.807
42.552
47.165
43.075
25.288
28.632
29.132
9.819
24.637
17.052
42.291
34.498
35.014
44.559
23.645
45.471
32.117
26.749
21.03
20.867
41.375
51.15
48.091
24.498
32.719
53.489
47.84
41.564
41.542
43.069
36.547
33.282
49.237
49.923
28.095
53.286
31.907
54.545
46.558
38.018
34.042
51.982
42.172
27.756
53.924
34.497
43.136
37.634
37.336
55.81
57.044
43.495
46.312
41.923
41.8
28.274
28.892
51.031
56.229
34.425
48.67
39.248
41.72
40.734
43.856
38.454
34.912
40.21
32.797
45.054
43.306
41.34
44.451
36.572

## Sheet: F
Protein Synthesis				Ubiquitin k-48
Control Lacta	10uM Lacta	20uM Lacta		Control Lacta	10uM Lacta	20uM Lacta
	85.196	66.065		63.89	147.784	156.621
120.46	56.919	57.318		59.874	111.566	128.836
114.73	66.91	28.648		55.013	110.714	128.823
117.751	42.433	55.464		67.88	118.684	122.298
97.837	81.392	71.783		72.833	152.803	133.836
142.433	83.418	45.58		63.27	122.771	102.442
97.061	78.021	37.484		54.944	152.139	118.798
106.85	66.965	56.358		72.356	125.774	123.767
95.723	48.729	14.485		71.619	95.202	89.052
86.255	63.479	65.712		51.916	113.947	136.935
113.005	19.056	52.292		49.226	125.568	124.84		3 independent experiments pooled
66.386	90.879	59.671		48.131	143.981	124.292
111.233	46.941	118.539		25.742	115.816	151.178
123.159	45.394	53.68		27.062	102.614	144.572
130.282	69.854	65.314		89.667	83.576	121.626		Anova (multiple comparation test)
101.772	91	82.823		91.977	124.46	136.809		Protein Synthesis
146.82	84.985	13.937		68.64	130.575	108.267		Control vs 10uM Lacta	31.89	27,97 to 35,80	Yes	****
141.333	76.755	65.24		65.808	120.09	115.601		Control vs 20uM Lacta	40.85	36,89 to 44,80	Yes	****
93.862	74.752	16.293		67.136	126.478	90.404		10uM Lacta vs 20uM Lacta	8.96	5,002 to 12,92	Yes	****
114.856	99.85	53.811		0.057	129.038	112.734
123.197	59.988	118.335		48.384	114.118	154.305		k-48 Ubiquitin
122.3	116.287	51.519		76.06	142.232	118.178		Control vs 10uM Lacta	-14.49	-19,12 to -9,854	Yes	****
117.112	60.585	66.199		71.974	130.991	136.596		Control vs 20uM Lacta	-15.47	-20,13 to -10,80	Yes	****
95.156	71.683	90.143		75.492	128.271	122.567		10uM Lacta vs 20uM Lacta	-0.9802	-5,496 to 3,535	No	ns
45.149	74.199	80.182		65.778	110.388	136.724
31.628	83.928	35.06		62.238	128.958	140.965
100.258	86.684	45.813		60.029	114.852	123.343
83.604	141.323	26.398		68.248	144.708	111.877
123.698	68.88	53.394		56.82	108.771	129.719
120.214	81.704	31.168		51.12	141.203	98.8
119.496	87.003	42.197		58.828	112.401	103.796
87.717	62.282	45.502		41.078	108.846	109.413
93.971	64.835	64.198		76.635	81.86	109.021
116.768	76.91	40.289		78.878	111.399	117.912
110.111	75.263	32.807		71.183	120.534	104.178
97.241	60.096	57.514		69.085	95.531	117.54
76.291	99.303	67.537		71.848	163.558	128.67
103.74	71.697	60.012		63.437	110.314	103.277
105.055	84.669	35.104		78.679	101.022	114.799
125.959	72.626			62.367	117.809	95.254
107.079	109.227	44.867		84.494	140.12	112.811
99.174	72.5	80.239		48.151	105.438	152.495
109.451	85.415	83.057		79.319	113.994	160.037
72.305	69.506	48.926		81.639	117.674	159.153
146.023	49.186	33.866		58.638	104.175	109.049
156.764	40.486	64.724		51.306	105.084	131.003
147.488	74.357	36.853		52.694	101.417	134.427
139.705	64.853	10.535		63.58	100.111	113.875
152.938	38.705	41.095		77.894	131.475	134.938
133.067	86.339	37.718		77.372	118.958	110.861
125.863	93.725	64.333		54.968	125.747	112.729
106.796	119.46	30.762		75.368	164.695	121.812
155.269	84.763	67.857		59.832	155.077	141.187
112.053	85.33	59.379		63.024	145.147	116.384
144.972	108.524	30.197		56.915	177.448	118.1
129.221	92.107	36.367		90.551	137.604	106.571
92.759	77.866	55.343			117.542	121.784
91.614	114.207	46.922		64.791	162.764	140.725
100.869	60.51	47.135		78.374	104.759	117.324
100.926	97.304	62.497		57.412	108.527	116.192
101.408	62.058	54.467		76.319	109.311	121.4
149.156	58.793	68.641		59.887	95.62	134.849
82.641	99.263	39.642		55.129	161.606	109.54
82.592	80.314	44.369		62.446	119.062	117.898
53.636	100.369	61.97		45.886	125.905	110.279
74.661	12.638	45.91		48.526	85.484	119.033
114.216	90.686	43.777		55.268	126.528	146.406
70.476	74.308	49.286			120.746	119.839
82.801	10.98	71.771		57.527	133.054	158.21
95.528	44.502	55.186		59.833	106.622	121.335
85.651	39.492	22.812		64.905	114.229	120.177
85.87	80.898	58.844		65.325	143.927	132.028
65.503	72.373	51.674		53.164	105.327	93.93
119.094	92.553	36.951		53.702	124.481	111.269
84.34	74.466	76.325		67.083	105.687	154.673
119.41	67.205	83.751		56.354	111.664	141.057
153.95	78.198	39.658		63.311	154.413	126.599
70.677	88.6	80.976			129.583	151.26
102.488	75.512	55.159		55.643	133.09	133.9
86.401	10.655	80.537		56.402	94.525	125.273
84.777	77.205	82.352		59.283	147.408	138.814
60.162	60.65	28.256		50.389	168.236	170.97
89.27	87.087	70.351		78.903	140.809	140.502
53.593	51.922	26.342		59.915	98.283	94.24
99.544	36.342			60.141	61.842	124.969
80.521	44.291	86.6		56.406	53.996	151.35
112.128	50.426	100.113		51.951	59.919	137.964
76.897	55.019	45.523			56.69	126.058
95.957	57.427	9.433		59.028	75.607	138.212
79.604	62.06	78.112		63.132	56.381	161.794
71.416	68.938	81.233		68.04	58.424	126.002
69.106	73.912	69.645		50.795	75.382	128.502
88.425	83.848	102.633		61.531	73.792	139.637
72.133	68.568	78.719		54.463	75.378	132.641
105.334	35.819	47.231		58.733	70.931	108.811
102.069	79.917	63.771			88.85	121.555
103.552	55.973	9.398		51.743	76.081	117.686
69.14	65.8	6.922		47.074	56.703	69.236
50.125	46.31	7.387		56.638	59.488	64.743
105.389	81.085	8.377		41.302	66.042	79.941
123.046	76.048	10.914		52.817	64.816	74.427
102.853	70.493	12.088		54.208	62.074	59.963
60.046	67.209	13.203		34.366		60.069
88.529	46.726	16.004		46.106	68.649	70.449
92.519	64.85	17.424		54.451	75.347	69.369
66.35	66.194	17.604		46.512	59.338	66.638
90.094	60.677	20.064		48.646	63.488	64.396
44.338	67.249	21.295		53.602	77.003	55.826
111.954	42.412	22.134		67.885	83.01	84.866
90.428	98.893	22.273		56.77	85.557	91.467
98.519	48.667	23.528		54.526	88.352	59.252
107.293		24.312		60.896	76.08
79.495	89.856	24.807		62.193	82.762	93.126
80.07	43.541	24.875		64.078	77.346	74.367
112.731		24.905		42.547		91.504
120.49	20.81	26.6			79.105	88.793
104.413	55.288	26.764		52.78	47.667	66.959
85.422	62.668	27.007		55.883	73.062	87.561
97.474	54.372	27.188		54.752	71.397	69.414
89.496	58.667	30.031		45.762	82.758	78.359
80.97	39.838	31.697		60.899	57.87	60.249
108.001	79.429	32.462		64.768	68.853	74.601
80.821		33.058		52.513	55.944	57.328
89.069	47.625	33.845		34.862	71.124	72.652
87.016	52.544	35.167		48.267	61.026	61.589
147.49	60.575	35.774		65.164	58.362	74.2
81.643	61.031	36.651		52.674	60.426	71.186
88.714	45.621	37.035		61.416	74.917	89.795
73.127	58.249	38.782		49.266	46.682
76.529	82.349	39.145		48.696		67.724
110.161	100.913	39.44		41.508	72.121	97.976
108.859		39.913			74.294	89.834
133.373	54.96	40.479		76.459	71.581	57.176
117.093	71.824	41.414		66.962	65.902	88.666
106.244	41.292	43.402		57.934	58.269	79.705
93.131		43.445		50.64	70.547	74.192
69.878	55.692	43.495		50.324	69.404	68.541
91.269	70.526	43.794		70.573	75.859	79.517
71.417	41.991	44.324		57.303	49.145	67.703
65.432	48.224	45.068		59.03	72.375	66.134
68.955	71.601	45.129		61.275	76.256	72.784
112.494	58.506	45.679			69.366	80.525
79.588	25.601	46.4		56.485	65.112	82.927
74.835		46.405		50.639
65.793	56.21	46.95		54.526	65.991	101.117
96.975		48.606		52.233	66.184	104.405
90.874	36.434	48.665		53.709	67.979	88.291
107.926	57.768	48.673		59.095	73.098	98.291
74.219	41.878	49.305		48.555	98.534	116.245
110.949	36.719	49.415		45.492	85.144	74.701
73.907	75.58	49.54		43.634	86.518	95.971
78.554	54.747	49.977		52.278	88.234	97.842
114.625	75.65	49.984		42.247	75.566	65.986
114.861	58.261	50.196		53.162	81.812	105.067
106.163	69.701	50.667		53.887		97.417
74.249	77.518	51.466		42.84	86.953	65.078
98.69	26.637	51.506		53.549	85.258	79.355
109.695		52.028		56.011	77.918	70.272
73.334	48.142	52.202		38.615	66.189	84.021
120.371	8.814	53.009			93.747
108.267	50.407	54.011		67.801	78.159	93.23
55.829	53.982	54.187		61.997	83.626	73.219
96.549		54.204		64.996	72.03	72.273
89.916	70.946	54.212		58.619	79.438	87.233
95.97	63.014	54.38		61.805	53.232	77.835
101.766	58.733	55.544		58.972	72.357	93.413
76.346	51.525	55.587		61.481	71.361
71.037	50.03	55.696		62.139		74.296
109.472	53.519	56.253		55.424	58.8	73.384
120.793	64.586	56.286		55.895	53.443	80.304
83.145	48.251	56.826		48.199	54.908	81.931
97.591	71.853	56.879		45.041	54.359	92.719
95.715	37.514	58.089		49.301	65.462	78.552
66.958	44.373	58.26		51.016	59.264	77.528
98.424	75.937	59.305		45.906	79.217	93.08
109.758	77.129	59.327		56.676	68.683	82.264
116.688	50.111	59.344		48.607	68.21	101.036
97.689	65.601	59.397		52.737	63.206	78.158
74.687	37.685	59.873		107.668	65.945	60.634
96.657	31.212	60.378		79.183	59.825	79.754
92.651	70.01	61.309		78.566	83.092	108.089
51.855	73.348	62.344		89.255	69.66
81.315	69.678	64.033		109.097		68.085
111.974	58.869	64.536		83.319	72.623	93.346
59.322	73.057	64.548		85.143	79.752	61.013
69.948	52.358	64.723		85.832	66.962	69.087
105.007	59.919	65.173		85.366	74.911	62.262
54.454	72.943	65.324		116.679	66.783	88.192
76.276	50.518	65.496		104.653	54.369	72.899
	38.718	65.832		93.288	66.754	70.353
119.804	42.9	66.347		146.314	61.448	55.3
80.447	29.245	66.952		92.38	73.764	67.497
124.579		68.918		90.703	70.676	63.672
98.983	76.765	69.107		134.678	65.283	69.006
	65.329	69.155		89.505	74.899
40.143	59.468	69.187		165.143	66.222	71.4
58.633	52.33	69.675		106.001	61.238	69.278
52.545	43.806	70.076		104.844	67.075	79.611
78.143	71.96	70.151		103.337	89.073	61.945
58.856	78.169	71.036		90.047	56.463	63.339
77.584	30.739	71.505		88.77		69.94
32.923	73.511	71.669		123.59	58.591	60.404
107.501	78.671	72.357		110.441	72.731	61.619
85.914	41.694	72.842		163.055	72.013	83.901
71.374	55.132	72.878		112.424	64.746	86.06
99.547	6.277	73.038		75.689	48.692	80.882
68.518	52.705	73.239		80.964	57.706	78.977
60.28	62.938	73.361		93.353	69.224	79.663
43.033	87.651	74.064		114.511	52.292	67.516
40.267	44.672	74.273		106.779	63.792
	34.77	74.414		131.813	65.408	62.304
	26.967	75.494		101.588	72.642	71.182
79.41	33.849	75.771		86.971	57	74.717
68.793	55.794	76.694		102.786	50.693	61.421
65.87	89.51	78.184		106.957		82.173
75.818		79.157		119.914	82.467	70.712
79.491	60.16	79.218		95.303	84.12	94.17
63.389	76.189	79.401		83.24	80.565	80.299
93.192	53.844	82.721		99.028	62.48	74.465
108.168	28.085	82.838		104.094	51.205	90.207
	45.486	84.256		81.652	58.195	64.71
	9.088	84.411		68.399	73.896	58.941
103.747	36.786	86.151		92.845	67.67	63.156
99.698	51.525	88.451		99.777	63.371	82.975
90.169	61.458	89.731		72.955	51.084
143.496	40.752	93.055		69.607	77.612	97.589
50.791		95.874		104.966	75.319	81.779
43.478	53.818	96.872		101.566	61.086	81.333
	53.252	96.89		95.438	93.051	68.375
46.445	33.969	97.723		91.255	83.358	93.239
93.404	55.213	107.193		79.055	88.48	80.201
136.545	12.401	108.529		72.901	63.638	73.847
	54.541	4.071		97.884	82.667	62.762
113.143	60.03	4.282		78.365	81.051	98.338
107.99	36.498	8.216		77.301	82.348	86.51
51.279	33.019	8.505		79.942	70.764	77.642
56.73	51.198	9.101		86.573	87.979	96.479
134.267	45.095	10.516		69.988	69.483	79.827
116.92	41.308	11.609		89.899	67.818	110.256
61.699	42.111	12.094		83.15	90.703	97.737
56.64	60.406	13.473		73.123	101.294	90.845
89.406	56.131	14.2		77.789	74.373	68.543
95.406	40.42	14.599		75.322	93.226	72.053
102.126	23.587	14.902		88.791	66.973	84.94
41.889	56.157	14.94		66.777	71.612	77.015
138.633	28.905	15.345		102.457	44.312	72.202
96.21	61.469	15.476		81.799	45.516	108.716
122.145	55.838	15.477		78.951	56.065	68.843
52.441	58.284	15.716		71.158	35.089	41.45
46.391	74.228	15.939		67.548	76.492	30.581
78.684	29.121	16.856		97.884	78.921	41.987
83.896	76.27	16.922		69.543	45.502	55.359
55.289	21.291	17.13		88.209	102.78	41.986
	32.438	17.532		75.616	120.476	80.449
79.839	60.075	18.286		96.367	59.529	38.119
98.137	52.293	18.298		70.987	92.425	48.417
71.374	71.028	18.381		59.433	62.689	75.174
93.317	49.334	18.738		126.057	82.818	51.857
64.745	26.017	18.924		120.022	51.064	81.764
106.322	49.71	19.105		126.16	60.821	61.727
73.879	60.629	19.356		109.977	109.416	49.788
80.269	29.316	19.899		131.7	77.708	84.71
56.809	64.193	21.907		128.636	68.621	72.847
44.477	57.558	22.601		122.72	77.658	75.561
55.142	45.102	23.278		118.934	55.826	77.452
61.839	25.688	24.176		160.777	76.807	87.581
73.267	14.155	24.953		115.916	104.464	89.58
	47.863	25.347		102.328	84.794	57.216
105.303	36.586	26.019		134.5	49.094	43.432
44.648	42.428	27.012		66.653	55.517	84.225
62.281	33.432	27.25		69.246	64.272	35.015
81.158	57.432	28.236		79.171		94.38
62.745	44.254	28.849		55.965	59.354	77.036
76.827	68.709	28.898		33.947	71.775	68.78
	59.685	29.029		62.218	67.826	71.297
	50.981	29.604		80.792	95.244	81.86
66.335		29.842		78.201	90.427	98.068
64.193	32.844	30.333		56.698	90.98	35.611
63.537	51.148	30.426		52.473	55.415	38.604
41.038	18.992	30.706		67.493	44.975	56.936
46.613	29.23	30.879		49.827	85.515	46.409
52.056	51.359	30.922		97.613	60.479	59.781
88.001	53.949	32.382		65.46	86.195	131.468
76.969	51.721	32.728		61.714	98.774	42.226
62.26	50.297	33.271		60.857	75.279	70.02
	32.876	33.408		51.019	77.491	61.672
49.106	28.788	33.836		80.349	52.198	74.85
93.512	77.332	34.481		70.998	60.736	70.876
108.857	34.226	34.732		87.983	57.636	56.843
69.857	36.74	34.913		72.197	78.231	115.221
75.056	50.908	35.047		80.059	51.193	98.448
63.099	71.906	35.078		76.718	45.371	79.207
66.778	29.007	35.162		94.618	75.844	102.038
92.404	40.463	35.217		78.702	58.871	67.164
64.555	52.802	35.592		62.413	70.696	41.855
92.424	65.492	35.694		81.888	72.083	63.062
75.947	45.573	36.539		55.655	98.583	65.539
62.995	18.465	36.552		61.456	110.524
112.515	44.451	36.911		57.623	47.801	55.539
75.078	81.275	37.015		48.007	97.538	91.727
60.063	44.186	37.864		58.818	103.842	82.406
139.417	93.711	38.456		49.781	96.875	56.114
83.467	26.421	38.575		62.905	113.077	50.686
99.65	50.486	39.006		37.366	68.547	61.242
101.436	59.005	39.029		71.251	100.738	76.891
49.179	45.447	40.352		74.598	58.948	59.238
78.334	64.47	40.654		62.448	95.763	112.017
52.673	60.762	41.63		63.762	101.147	71.936
141.43	38.926	42.265		74.498	67.459	45.248
104.188	56.308	42.27		46.891	77.156	81.701
	37.128	42.333		121.092	98.416	64.374
121.327	42.037	43.081		99.543	79.312	63.049
97.08	22.584	43.51		57.803	53.244	71.566
83.931	46.242	44.244		29.524	59.386	76.413
146.404		44.366		55.363	63.25	43.64
74.465	61.481	44.41		63.701	84.068	44.891
53.432	24.554	44.787		63.646	80.459	60.991
105.19	72.073	45.056		65.628	50.097	78.217
69.392	18.861	45.426		83.63	63.008	78.7
66.843	48.809	45.543		77.577	38.911	69.591
85.035	56.848	45.692		84.845	82.641	42.449
106.802	19.006	46.337		69.789	73.928	44.042
60.461	47.602	46.537		86.439	56.606	78.587
78.456	67.85	48.092			86.54	83.212
116.62	37.762	48.34		75.558	40.665	82.836
	74.784	48.664		116.929	77.869	92.777
130.826	29.555	49.051		73.281	126.802	61.588
68.928	84.014	49.903		81.129	65.436	62.102
82.587	31.126	50.381		80.79	86.916	80.831
48.812	66.541	50.505		75.381	95.219	59.918
43.097	36.179	50.526		87.966	79.476	61.423
72.518	100.292	50.694		45.03	59.942	49.111
	8.579	50.942		77.922	55.631	58.892
	45.335	51.534		78.119	72.752	41.412
	70.365	51.707		53.363	71.605	34.726
	69.253	52.077		52.678	118.511	26.51
	41.238	52.102		37.695	77.418	40.71
	86.567	52.19		71.737	115.944	96.002
	68.734	52.697		65.34	67.483	90.9
	13.012	53.192		36.557	100.463	30.792
	42.973	53.939		43.409	76.996	51.463
	72.23	53.946		38.808	107.785	57.432
	73.953	53.967		51.413	98.74	77.204
	26.734	54.321		63.16	81.723	68.775
	32.361	55.191		43.501	71.957	39.983
	66.716	55.254		47.83	72.387	55.408
	53.325	55.34		59.192	39.522	100.693
	34.311	55.35		59.213	64.897	53.76
	48.769	55.896		67.688	78.803	43.366
	25.438	56.116		38.628	86.585	70.754
	40.949	56.326		63.366	87.272	37.026
	74.637	56.702		47.533	83.942	84.075
	92.001	57.565		37.438	67.748	61.557
	93.966	57.715		63.597	92.002	87.379
	17.802	58.2		51.507	87.139	91.183
	34.576	58.43		81.84	52.931	80.477
	75.056	58.594			79.835	65.516
	38.387	59.88			101.566	63.525
	71.084	60.819			60.375	80.456
	89.434	60.869			70.961
	49.982	61.071			80.546	66.862
	52.411	63.07			51.948	93.041
	30.096	64.39			55.298	79.702
	40.973	64.673				86.39
	72.264	65.217			137.262	44.808
	50.646	66.267			55.74	44.796
	45.877	66.531			63.096	68.14
	65.915	67.87			87.991	54.746
	47.418	69.492			68.938	78.612
	33.865	70.228			52.527	62.204
	82.906	71.558			94.36	45.866
	41.316	71.938			120.221	65.085
	54.036	71.954			66.93	81.85
	110.752	73.559			71.845	85.104
	52.966	74.183			76.22	96.738
	63.917	75.528			74.112	63.421
	61.97	82.206			97.594	98.464
	24.683	85.507			67.674	82.626
	45.265	88.711			64.812	60.346
	77.954	104.958			57.872	56.352
	23.64				78.947	100.069
	25.25				61.634	57.389
	31.362				51.76	52.529
	35.124				50.15	70.92
	38.302				66.638	53.522
	40.128				102.664	45.434
	41.164				94.948	74.602
	47.165				102.837	64.966
	52.437				109.832	41.109
	57.962				100.918	78.044
	61.544				125.747	45.615
	61.991				109.926	73.047
	63.014				119.762	87.329
	63.771				118.156
	65.132				119.594
	68.438				73.675
	74.408				84.472
	76.154				90.281
	76.327				108.261
	81.751				127.016
	83.322				88.501
	83.416				91.642
	87.758				114.268
	91.646				88.054
	93.084				89.524
	93.252
	99.237
	100.506
