# Supplementary material for: The switch-like expression of heme-regulated kinase 1 mediates neuronal proteostasis following proteasome inhibition
Source: eLife. 2020 Apr 24;9:e52714. doi: 10.7554/eLife.52714 (PMC7224698; doi:10.7554/eLife.52714)
Supplement: Figure 1—figure supplement 2—source data 1. [file elife-52714-fig1-figsupp2-data1.xlsx]

## Sheet: A
Experiment 1					Experiment 2					Experiment 3
Well	ABS	Control			Well	ABS	Control			Well	ABS	Control
A1	0.4946	0.574829	Mean		A1	0.2087	0.235933	Mean		A1	0.4443	0.368	Mean
A2	0.5857	0.0377976	Devest		A2	0.2154	0.0422567	Devest		A2	0.5898	0.202326	Devest
A3	0.5675				A3	0.3263				A3	0.5579
A4	0.6073				A4	0.2405				A4	0.2183
A5	0.5969				A5	0.2283				A5	0.2018
A6	0.5765				A6	0.2318				A6	0.1959
A7	0.5953				A7	0.2684				B1	0.6221	10uM MG132
B1	0.5326	10uM MG132			A8	0.1854				B2	0.6199	0.398983	Mean
B2	0.6336	0.617571	Mean		A9	0.2186				B3	0.547	0.211298	Devest
B3	0.6645	0.0427071	Devest		B1	0.2205	10uM MG132			B4	0.2238
B4	0.6509				B2	0.2236	0.222337	Mean		B5	0.2018
B5	0.6125				B3	0.247	0.010956	Devest		B6	0.1793
B6	0.6071				B4	0.226				C1	0.4834	20uM MG132
B7	0.6218				B5	0.2163				C2	0.5561	0.3472	Mean
C1	0.521	20uM MG132			B6	0.2203				C3	0.5598	0.192843	Devest
C2	0.5809	0.570429	Mean		B7	0.2164				C4	0.2041
C3	0.611	0.0406316	Devest		B8	0.2177				C5	0.2265
C4	0.6064				B9	0.2114				C6	0.1895
C5	0.5857				C1	0.2203	20uM MG132
C6	0.5067				C2	0.2193	0.218756	Mean
C7	0.5813				C3	0.1969	0.0109504	Devest
					C4	0.2249
					C5	0.2128
					C6	0.2243
					C7	0.2233
					C8	0.2333
					C9	0.2137
All experiments Normalised			t-test
Control	1		Control vs 10uM
10uM MG132	1.03364		P value	0.5027
20uM MG132	0.954339		P value summary	ns
			Control vs 20uM
			P value	0.08
			P value summary	ns

## Sheet: D
	Normalised protein synthesis (AU)										62805503	6355841
		Experiment 1	Experiment 2	Experiment 3	Experiment 4						49533633	1910719
		2 biological replicates	2 biological replicates	4 biological replicates	4 biological replicates						61163846	2751891
	Control	1	1	1	1						54910583	2362305
	PI 2h	0.219946	0.261956	0.287989	0.196145						47599533	2980598
	14h wash out	0.967661	1.05842	0.961187	1.04568						42125884	3133891
	All experiments Normalised
	Control	1
	PI 2h	0.248696
	14h wash out	1.02176
	Wash out vs PI
	P value	< 0,0001
	P value summary	****
	Wash out vs Control
	P value	0.7573
	P value summary	ns

## Sheet: F
ZsGreen	Mock	ZsGreen	Mock
4.30274	1.82337	1.12323	1.16798	Average
0.686624	0.912634	0.0617146	0.0330335	St.Dev
0.484609	1.4051			Percentaje		3 independent experiments pooled
1.1469	0.759143	Mock	1.16798	100
1.11456	0.695285	ZsGreen	1.12323	96.168
0.713306	0.53723
2.08832	1.74009
1.4407	1.07554					Table Analyzed	Unpaired t test data
1.81994	1.22162
1.56722	1.37139					Column B	Mock
0.831371	0.733887					vs.	vs,
0.13346	2.41167					Column A	ZsGreen
1.31293	2.54139
1.56985	3.81269					Unpaired t test
0.969243	1.66434					P value	0.4928
0.70062	2.48451					P value summary	ns
0.151435	3.33399					Significantly different? (P < 0.05)	No
0.690709	2.0685					One- or two-tailed P value?	Two-tailed
0.994037	1.51479					t, df	t=0,6863 df=534
0.770814	2.73874
0.182433	2.01809
0.971135	1.65506
1.10711	1.17226
0.173312	0.539296
0.0937868	1.18825
1.53197	1.06484
0.191874	0.878278
0.939252	0.508901
0.737745	0.578091
2.02301	0.915187
1.67457	3.2667
0.936859	1.45076
0.161786	2.30339
0.841868	2.04542
2.35213	1.01483
0.72575	0.877342
1.74173	1.06423
0.714026	0.720767
2.10342	0.805646
0.132559	1.36568
0.3485	1.5774
2.04969	1.5563
6.6705	0.651036
2.34694	1.31225
2.46079	1.73652
0.437708	1.51558
0.188637	1.21015
2.50884	0.549729
1.26705	1.07067
1.16247	0.460202
0.571278	1.56487
1.67854	0.439369
1.33688	1.65509
1.25601	1.22537
0.948901	1.17681
1.21234	0.662058
0.520854	1.88626
0.304884	0.953581
1.06386	0.962468
0.111039	0.5942
0.144756	0.443449
0.543783	0.545474
	1.39414
0.940118	0.0948516
0.921196	1.18892
1.11264	1.37447
1.62844	1.12779
2.02286	0.549197
3.8286	1.43595
2.37861	0.42872
0.61634	1.02768
1.09623	0.455072
1.02337	0.455072
0.656069	0.356221
3.22719
0.235574	1.43001
0.222068	2.18127
0.735551	0.690334
0.117874	1.00712
1.0773	1.00926
1.73063	0.307321
1.55848	0.746988
2.94662	0.71617
0.548564	0.786426
0.54215	0.0710939
0.406035	0.807913
5.72538	1.23582
1.50937	1.06587
0.296862	1.41464
1.12152	0.903371
0.220639	1.4683
1.05431	3.12286
1.14044	0.839183
1.32522	0.975199
0.107024	0.769844
1.05244	0.52959
0.504887	1.01312
0.113665	0.933697
0.165165	0.22325
0.319663	1.39135
0.827304	1.79471
1.42095	1.99629
1.30388	0.80133
2.31689	2.31756
0.481606	1.6155
0.152912	1.01381
1.19569	1.54298
1.06114	1.5276
1.33116	3.02975
3.13664	1.16704
2.06007	0.644491
0.417132	0.582
1.98198	1.3387
1.54451	0.561646
2.36608	1.06276
1.08366	0.480146
1.64827	1.21043
1.42174	1.04579
0.163422	1.17728
0.692796	1.01916
0.290136	1.32352
1.01706	1.28095
1.69447	1.31453
1.95433	0.927148
0.163441	0.910762
1.63995	0.815272
0.511518	1.13968
0.615883	0.98824
0.944997	1.5523
2.69641	0.911423
1.28408	1.38082
1.63075	1.05621
1.33634	1.34886
1.42607	1.41424
2.51251	0.988924
2.45746	1.05372
1.28994	1.39185
2.46954	1.06596
1.07145	0.880397
0.642689	1.26752
0.506891	1.16616
0.157118	2.93948
0.218139	2.93948
0.825517	2.39375
0.16582	1.28305
1.71531	1.51398
0.964924	1.08093
0.59735	0.748254
1.87274	0.314846
0.405473	0.405473
1.77959	0.82292
0.178601	1.48414
1.91296	1.2249
1.08349	1.1706
0.173171	1.1245
0.38544	1.04322
0.54415	0.558035
1.0063	0.397831
0.626294	0.70517
2.25806	0.0333153
0.435659	0.255097
1.37163	0.855195
0.551993	1.42451
0.241318	1.38759
	1.16376
1.11499	1.80034
0.198975	2.02081
0.438356	1.34702
0.762837	1.04125
0.787214	1.99457
0.251337	0.409829
1.07815	1.75467
0.510563	1.24227
1.15685	2.16839
1.92968	0.818133
2.00951	2.06066
1.57167	1.23182
1.12446	1.31559
0.271765	0.84883
1.37444	0.660837
2.34843	2.19553
0.864584	1.01022
2.37625	1.57059
	1.10523
1.48762	1.41751
2.76841	1.23171
0.131802	0.960765
0.884838	0.0753152
0.176016	2.21849
1.6562	1.50848
0.182717	1.24065
1.1638	1.17366
0.779373	0.0313961
1.54011	0.483835
0.938122	1.49253
0.953861	2.65272
2.13086	0.850242
0.62872	1.96476
0.620849	2.13079
0.804623	0.42509
0.878407	0.722678
0.22139	1.71979
0.225161	1.98801
1.36377	0.237515
0.158658
0.162313	1.77973
3.16234	1.10558
	2.78493
2.43119	0.879718
0.83511	1.80145
0.944616	0.723733
0.80008	1.31492
0.188321	0.568108
0.905035	1.46332
0.881672	1.3143
0.110397	1.1345
0.67965	1.95352
1.55896	0.0537425
1.421	0.987952
1.23037
	1.36383
0.177832	1.10693
1.16345	1.02862
	1.13424
0.199376	1.35806
0.325084	0.965319
0.21218	0.963427
0.88039	0.875008
2.85915	0.808211
0.184791	1.02645
	1.25832
	1.11795
	1.0677
	0.949012
	0.621986
	0.918445
	1.02831
	1.08071
	0.867495
	1.35151
	0.862364
	1.18538
	1.11851
	1.0717
	1.20827
	0.883688
	0.841538
	1.09476
	0.763147
	0.98643
	1.43345
	0.921032
	0.904746
	1.24896
	1.33704
	1.29284
	0.875869
	0.434314
	0.988296
	0.881869
	0.496429
	0.98018
	1.28816
	1.37095
	0.996119
	0.487278
	1.10124
	1.25091
	1.86556
	1.53774
	1.4558
	1.4277
	0.769581
	1.37432
	0.95611
	1.23891
	0.861773
	0.898557
	0.98218
	0.538489
	0.707745
	0.869822
	0.712298
	0.847277
	0.678086
	0.888655
	1.06554
	1.27784
	1.27148
	1.13498
	1.08178
	0.775186
	0.755112
	1.62928
	1.23302
	1.5994
	1.10459
	1.96734
	1.50196
	1.07662
	0.45007
	1.24997
	1.15782
	0.844789
	0.887037
	1.29177
	1.04039
	0.572904
	0.707056
	0.556622
	0.44487
	0.831463
	0.79884
	1.01025
	1.36369
