# Supplementary material for: The switch-like expression of heme-regulated kinase 1 mediates neuronal proteostasis following proteasome inhibition
Source: eLife. 2020 Apr 24;9:e52714. doi: 10.7554/eLife.52714 (PMC7224698; doi:10.7554/eLife.52714)
Supplement: Figure 1—source data 2. [file elife-52714-fig1-data2.xlsx]

## Sheet: 1C
Normalised Protein Synthesis (AU)
Experiment 1	Protein Synthesis (AU)	Experiment 2	Protein Synthesis (AU)	Experiment 3	Protein Synthesis (AU)
Control	1	Control	1	Control	1		Each experiments has two biological replicates per condition
PI	0.367922	PI	0.238379	PI	0.129698
	All experiments normalised		Unpaired t test
Control	1		P value	0.0004
PI	0.245333		P value summary	***

## Sheet: 1D
	Experiment 1						Experiment 2						Experiment 3						Experiment 4
	Lactacystin (uM)	Protein Synthesis	Actin	Lactacystin (uM)	K-48 Ubiquitin	Actin	Lactacystin (uM)	Protein Synthesis	Actin	Lactacystin (uM)	K-48 Ubiquitin	Actin	Lactacystin (uM)	Protein Synthesis	Actin	Lactacystin (uM)	K-48 Ubiquitin	Actin	Lactacystin (uM)	Protein Synthesis	Actin	Lactacystin (uM)	K-48 Ubiquitin	Actin
	0	54107370	3616134	0	4062933	3616134	0	79781758	7081154	0	13389066	7081154	0	17319614	3871305	0	69438260	3871305	0	21341418	7940569	0	90472273	7940569
	0	66849663	3274719	0	5307468	3274719	0	78041909	7780861	0	9746853	7780861	0	19108664	5141255	0	84234595	5141255	0	19109861	8809983	0	86742616	8809983
	5	41042449	4085426	5	17337146	4085426	5	63780616	8524861	5	35418241	8524861	5	45140517	4475841	5	53586897	4475841	5	33025765	8768276	5	74607080	8768276
	5	39868500	4879426	5	17986388	4879426	5	55472131	7183033	5	34842028	7183033	5	44985203	3873719	5	73780988	3873719	5	33438258	7448447	5	66837545	7448447
	10	37470215	5041134	10	21428560	5041134	10	54023059	7145619	10	36968877	7145619	10	51708931	4658134	10	53967704	4658134	10	34914279	7589033	10	64986645	7589033
	10	23014144	5383719	10	21624560	5383719	10	24818169	4885083	10	27181513	4885083	10	55013052	5046134	10	60876361	5046134	10	30560673	4974205	10	37301624	4974205
	20	29093144	5809719	20	26241388	5809719	20	21927796	3912548	20	32651241	3912548	20	56616881	3997891	20	40349704	3997891	20	32938836	4125669	20	34365089	4125669
	20	20521032	4738134	20	23911439	4738134	20	19229884	5165497	20	37470777	5165497	20	55236638	3932770	20	41776876	3932770	20	35919158	5468205	20	31156654	5468205
	Average all experiments
		Lactacystin (uM)	Protein Synthesis	K-48 Ubiquitin
		0	1	1
		5	0.738939	2.52584
		10	0.592453	2.83178
		20	0.491491	3.72187
		ANOVA multiple comparation test							t-test	Protein Synthesis
		Protein Synthesis						0 vs. 5	P value	0.0211
		0 vs. 5	0.2611	-0,06266 to 0,5848	No	ns			P value summary	*
		0 vs. 10	0.4075	0,08382 to 0,7313	Yes	*		0 vs. 10	P value	0.0047
		0 vs. 20	0.5085	0,1848 to 0,8322	Yes	**			P value summary	**
								0 vs. 20	P value	0.0013
		K-48 Ubiquitin							P value summary	**
		0 vs. 5	-1.526	-2,726 to -0,3256	Yes	*
		0 vs. 10	-1.832	-3,032 to -0,6316	Yes	**
		0 vs. 20	-2.722	-3,922 to -1,522	Yes	***
									t-test	K-48 Ubiquitin
								0 vs. 5	P value	0.0016
									P value summary	**
								0 vs. 10	P value	0.0004
									P value summary	***
								0 vs. 20	P value	0.0007
									P value summary	***

## Sheet: 1F
K48R G76A	Mock	K48R G76A	Mock
0.828599	0.867062	1.05618	1.46198	Average
1.49576	0.668085	72.243	100	%
	0.466302
1.42757	0.464567
0.306563	0.893141
0.510967	0.306155
1.95823	0.917978
0.616525	4.41019
2.25213	0.525084
0.180606	0.0991394			Table Analyzed	Unpaired t test data
0.52423	1.02337
0.756929	3.12283			Column B	Mock
1.14813	0.584885			vs.	vs,
1.95627	1.50079			Column A	K48R G76A
0.779197	1.48188
1.18579	4.97667			Unpaired t test
1.31328	4.69607			P value	0.0022
1.44859	3.85271			P value summary	**
1.20854	0.712449			Significantly different? (P < 0.05)	Yes
0.967322	0.587018			One- or two-tailed P value?	Two-tailed
0.977573	0.784054			t, df	t=3,102 df=213
0.956131	1.03818
1.03011	0.620585
1.25326	0.735556
0.69979	0.13927
1.10622	1.56174
0.49815	1.52166
1.1302	0.500126
0.434365	1.26076
3.00199	0.536392
0.545848	0.860128
0.2038	0.729451
1.0044	0.945293
1.00997	1.72651
0.278685	0.929464
0.496251	0.263078
0.533231	0.8618
0.36227	3.14555
1.46538	0.478915
1.22058	2.10104
0.331159	1.38584
0.743373	0.835719
0.316997	1.70647
0.439342	0.873076
1.16689	2.28273
1.79969	1.69817
1.09396	1.15621
	1.43794
1.09603	1.52778
0.267086	1.38712
0.701768	1.25336
1.30236	1.34584
2.77245
	2.13324
0.416828	0.719503
1.26753	1.89051
0.425718	3.37946
0.401554	1.03271
0.928083	1.04858
1.26695	1.85288
0.25615	1.71848
1.16007	0.516729
0.269319	1.60994
1.0884	1.78467
0.870702	1.88459
1.43481	3.19174
1.79271	0.485303
2.11028	0.758241
2.49713	0.76484
1.32496	0.146522
0.244002	1.23443
1.33072	2.41662
1.01222	0.921501
0.521942
3.17315	2.16095
0.719535	1.52428
0.367813	0.745615
2.05854	0.744775
0.185708	0.393573
0.979312	0.919984
0.305051	0.451464
1.33464	1.37796
2.445	0.88122
1.35314	0.970234
	2.66972
1.22652	5.49995
1.28045	0.487092
1.61008	1.09794
0.709912	1.65178
1.01394	0.339698
1.0392	1.03309
1.17602	1.34695
1.33546	5.32938
0.429891	0.996193
0.951454	0.599165
0.577147	1.58777
0.70832	1.64116
0.311809	0.510527
0.485743	1.42423
0.869533	0.714953
1.16252	1.41842
1.61892	4.18984
0.385362	5.30831
1.56354	1.52795
2.68153	3.49123
0.650945	0.775049
0.199792	0.421049
1.65008
0.853719
0.702262
1.0516
2.58487
1.37644
1.32622

## Sheet: 1J
	Cut Dendrites
	Normalised Protein Synthesis (AU)
	Experiment 1	Experiment 2	Experiment 3	Experiment 4
	3 biological repliactes	2 biological repliactes	3 biological repliactes	3 biological repliactes
Control	1	1	1	1
PI	0.419481	0.488643	0.557611	0.132604
	All experiments normalised
Control	1
PI	0.419481
		t-Test
		P value	0.0007
		P value summary	***
