# Supplementary material for: The switch-like expression of heme-regulated kinase 1 mediates neuronal proteostasis following proteasome inhibition
Source: eLife. 2020 Apr 24;9:e52714. doi: 10.7554/eLife.52714 (PMC7224698; doi:10.7554/eLife.52714)
Supplement: Figure 2—figure supplement 1—source data 1. [file elife-52714-fig2-figsupp1-data1.xlsx]

## Sheet: B
	Experiment 1	Experiment 2	Experiment 3
	2 Biological Replicates	2 Biological Replicates	2 Biological Replicates
Control	1	1	1
ActD	1.03296	0.895716	0.748406
PI	0.14904	0.208653	0.286178
PI+ActD	0.0621836	0.131981	0.215092
	All experiments Normalised values
Control	1
ActD	0.89236
PI	0.214624
PI+ActD	0.136419
t-test	Control vs ActD
P value	0.2603
P value summary	ns
t-test	PI vs PI+ActD
P value	0.2584
P value summary	ns

## Sheet: C
			Control					30min 20uM MG132					60min 20uM MG132
	Amino Acid	Replicate1	Replicate2	Replicate3	average	desvest	Replicate1	Replicate2	Replicate3	average	desvest	Replicate1	Replicate2	Replicate3	average	desvest
	His	15017	14683	15970	15223.3	667.849	12467	14811	23688	16988.7	5918.99	13988	18858	19237	17361	2927.24
	Ser	94135	84733	81006	86624.7	6765.83	66970	73246	88826	76347.3	11253.2	78369	97919	92942	89743.3	10159.9
	Gln	259446	209122	207111	225226	29652.2		201308	260762	231035	42040.3	217286	268031	260667	248661	27420.2
	Arg	15894	13209	15843	14982	1535.67	10409	10939	24513	15287	7994.34	12795	15044	14566	14135	1184.83
	Gly	148456	150825	142855	147379	4092.76	91439	116293	115039	107590	14001.5	114359	136339	132185	127628	11677.2
	Asp	33347	30957	39704	34669.3	4520.94	26696	30621	26552	27956.3	2308.79		36734	36572	36653	114.551
	Glu	210116	178247	199020	195794	16177.5	141545	175049	178626	165073	20454.5		236584	219160	227872	12320.6
	Thr	128457	112355	112183	117665	9346.54	83632	103601	135220	107484	26012.3	123608	131585	129336	128176	4113
	Ala	148979	119450	140544	136324	15210	108055	110632	152871	123853	25163.6	122977	151620	147143	140580	15408.1
	Pro	17241	13287	15402	15310	1978.6	13186	14985	17640	15270.3	2240.67	5014	23888	22357	17086.3	10482.9
	Cys	2001	1409	1509	1639.67	316.893	0.857	1536	1344	1440	135.765		1413	1172	1292.5	170.413
	Lys	40163	29163	42431	37252.3	7096.76	31658	22350	52273	35427	15313.4	30522	35807	36116	34148.3	3144.29
	Tyr	35434	32639	36739	34937.3	2094.64	26989	34956	51864	37936.3	12702.5	10967	44298	43650	32971.7	19059.4
	Met	11700	11064	11886	11550	431.041	8706	10970	18547	12741	5153.99	40874	14621	14138	23211	15298.5
	Val	43813	36638	43771	41407.3	4130.42	35624	34916	60585	43708.3	14619.9	10000	49437	49471	36302.7	22778.8
	Ile	34411	29866	34507	32928	2652.2	27890	27878	49344	35037.3	12389.9		40957	40869	40913	62.2254
	Leu	35874	30282	36092	34082.7	3293.28	29865	29279	49862	36335.3	11718.1		41300	41056	41178	172.534
	Phe	38518	35036	43339	38964.3	4169.46	27394	37754	73810	46319.3	24364.6	6051	45517	45172	32246.7	22686.8
	Trp	6862	6219	7793	6958	791.379	4584	6029	11304	7305.67	3537.23		8219	8010	8114.5	147.785
		ANOVA summary
		F	0.07075
		P value	0.9318
		P value summary	ns
		Are differences among means statistically significant? (P < 0.05)	No
		R square	0.002613

## Sheet: F
	Protein synthesis Relative values
	Experiment 1	Experiment 2	Experiment 3	Experiment 4
	2 Biological Replicates	2 Biological Replicates	2 Biological Replicates	2 Biological Replicates
Control	1	1	1	1
Isrib	1.11717	0.729123	1.01598	1.02491
	All experiments Relative values
Control	1
Isrib	0.971796
	t-test
	Control vs ISRIB
	P value	0.7487
	P value summary	ns
