# Supplementary material for: The switch-like expression of heme-regulated kinase 1 mediates neuronal proteostasis following proteasome inhibition
Source: eLife. 2020 Apr 24;9:e52714. doi: 10.7554/eLife.52714 (PMC7224698; doi:10.7554/eLife.52714)
Supplement: Figure 2—source data 2. [file elife-52714-fig2-data2.xlsx]

## Sheet: 1C
	peIF2a/eIF2a
	Experiment 1	Experiment 2	Experiment 3	Experiment 4	Experiment 5	Aver	Devest
0	1	1	1	1	1	1	0
15	1.1737	1.05357	1.39556	0.840302	1.1201	1.11665	0.200877
30	1.41092	1.26496	1.16888	1.02097	1.4912	1.27138	0.187778
40	1.38448	1.45705	1.32403	1.05409	1.36744	1.31742	0.154824
60	1.64376	1.40522	1.48846	1.34105	1.52839	1.48137	0.116318
120			1.77273	1.73873	2.12256	1.87801	0.212469
t-test 0 vs X
15	0.2303
	ns
30	0.012
	*
40	0.0018
	**
60	< 0,0001
	****
120	0.002
	**

## Sheet: 1E
Normalised Protein Synthesis
	Experiment 1	Experiment 2	Experiment 3	Experiment 4	Averag	devest
Control	1	1	1	1	1	0
PI	0.543543	0.293141	0.27248	0.297327	0.351622	0.128407
PI+ISRIB	1.02699	0.727297	1.26246	0.639295	0.914011	0.285488
Anova
Control vs. PI	0.6484	0,2916 to 1,005	Yes	**
Control vs. PI+ISRIB	0.08599	-0,2708 to 0,4428	No	ns
PI vs. PI+ISRIB	-0.5624	-0,9192 to -0,2056	Yes	**
