# Supplementary material for: The switch-like expression of heme-regulated kinase 1 mediates neuronal proteostasis following proteasome inhibition
Source: eLife. 2020 Apr 24;9:e52714. doi: 10.7554/eLife.52714 (PMC7224698; doi:10.7554/eLife.52714)
Supplement: Figure 3—figure supplement 1—source data 1. [file elife-52714-fig3-figsupp1-data1.xlsx]

## Sheet: B
LIVER					mono	di	poly	poly/mono	poly over mono+poly %
20171203	Liv	3	repl1	wt	3319	362	6917	2.08406	0.675752
20171203	Liv	3	repl2	wt	3306	256	7568	2.28917	0.695972
20171203	Liv	5	repl1	ko	1493	144	4802	3.21634	0.762828
20171203	Liv	5	repl2	ko	1619	119	8177	5.05065	0.834728
20181109	Liv	3		wt	4267	164	6383	1.4959	0.599343
20181109	Liv	1		wt	3876	254	10258	2.64654	0.725768
20181109	Liv	6		wt	2967	83	8758	2.9518	0.746951
20181109	Liv	2		ko	2470	160	7716	3.12389	0.75751
20181109	Liv	5		ko	2149	131	8074	3.7571	0.789788
20181109	Liv	4		ko	1643	147	10482	6.37979	0.864495
CORTEX
20171203	CX	3	repl1	wt	728	108	1613	2.21566	0.689022
20171203	CX	3	repl2	wt	483	41	1822	3.77226	0.790456
20171203	CX	5	repl1	ko	785	110	1623	2.06752	0.674003
20171203	CX	5	repl2	ko	996	240	2329	2.33835	0.700451
20181123	CX	1		wt	1044	112	2555	2.44732	0.709919
20181123	CX	2		ko	1120	127	2935	2.62054	0.723798
20181123	CX	3		wt	1021	117	2591	2.53771	0.717331
20181123	CX	4		ko	1069	126	2592	2.4247	0.708003
20181123	CX	5		ko	931	113	2542	2.7304	0.731932
20181123	CX	6		wt	1074	137	2750	2.56052	0.719142
HIPPOCAMPUS
20171203	HC	3	repl1	wt	619	34	700	1.13086	0.530705
20171203	HC	3	repl2	wt	1654	116	3583	2.16626	0.68417
20181123	HC	1		wt	978	34	253	0.258691	0.205524
20181123	HC	3		wt	684	34	750	1.09649	0.523013
20181123	HC	6		wt	665	37	641	0.96391	0.490812
20171203	HC	5	repl1	ko	763	47	1029	1.34862	0.574219
20171203	HC	5	repl2	ko	505	26	648	1.28317	0.562012
20181123	HC	2		ko	743	43	657	0.884253	0.469286
20181123	HC	4		ko	809	53	519	0.641533	0.390813
20181123	HC	5		ko	670	23	795	1.18657	0.542662
		LIVER
		Paired t test
		P value	0.0008
		P value summary	***
		CORTEX
		Paired t test
		P value	0.4086
		P value summary	ns
		HIPPOCAMPUS
		Paired t test
		P value	0.7862
		P value summary	ns

## Sheet: E
wt	Experiment 1				Experiment 2
	Time (h)	eIF2a	peIF2a	eIF2a:peIF2a	Time (h)	eIF2a	peIF2a	eIF2a:peIF2a
	0	3092548	583314	0.188619	0	3601640	1172627	0.325581
	1	3207012	1087627	0.33914	1	3512154	2316548	0.65958
	2	3242669	1372406	0.423233	2	3469619	2058841	0.593391
GCN2 K.O.	Experiment 1				Experiment 2				Experiment 3
	Time (h)	eIF2a	peIF2a	eIF2a:peIF2a	Time (h)	eIF2a	peIF2a	eIF2a:peIF2a	Time (h)	eIF2a	peIF2a	eIF2a:peIF2a
	0	2950719	311364	0.105521	0	314021	711657	2.26627	0	2617861	1155385	0.441347
	1	3275669	1061456	0.324043	1	243607	788485	3.23671	1	3333326	2142719	0.642817
	2	3314083	1457527	0.439798	2				2	3171569	1802062	0.568193
PERK K.O.	Experiment 1				Experiment 2				Experiment 3
	Time (h)	eIF2a	peIF2a	eIF2a:peIF2a	Time (h)	eIF2a	peIF2a	eIF2a:peIF2a	Time (h)	eIF2a	peIF2a	eIF2a:peIF2a
	0	1450305	1476355	1.01796	0	1946033	313828	0.161266	0	3863326	533314	0.138045
	1	1229477	2054497	1.67103	1	3297205	1980062	0.600527	1	4539447	1711598	0.37705
	2				2	3662326	2572619	0.702455	2	5416033	2992276	0.552485
	All experiments relative values
		wt	GCN2 K.O.	PERK K.O.
	Time (h)	eIF2a:peIF2a	eIF2a:peIF2a	eIF2a:peIF2a
	0	1	1	1
	1	1.90847	1.90847	2.69891
	2	3.16694	3.16694	4.17905
	Anova (wt vs GCN2 K.O. vs PERK K.O.)			t-Test
	Time 2h			wt vs GCN2 (0h)	0.4903	wt vs GCN2 (1h)		wt vs GCN2 (2h)
	P value	0.63		Unpaired t test	ns	Unpaired t test		Unpaired t test
	P value summary	ns		P value		P value	0.5059	P value	0.9714
				P value summary		P value summary	ns	P value summary	ns
	Anova (wt vs GCN2 K.O. vs PERK K.O.)
	Time 4h			wt vs PERK (0h)	0.6625	wt vs PERK (1h)		wt vs PERK (2h)
	P value	0.4526		Unpaired t test	ns	Unpaired t test		Unpaired t test
	P value summary	ns		P value		P value	0.521	P value	0.4036
				P value summary		P value summary	ns	P value summary	ns
