# Supplementary material for: The switch-like expression of heme-regulated kinase 1 mediates neuronal proteostasis following proteasome inhibition
Source: eLife. 2020 Apr 24;9:e52714. doi: 10.7554/eLife.52714 (PMC7224698; doi:10.7554/eLife.52714)
Supplement: Figure 3—figure supplement 2—source data 1. [file elife-52714-fig3-figsupp2-data1.xlsx]

## Sheet: B
	#DAPI	#MRNA	mrna/cells			#DAPI	#MRNA
HCN479-Wtdish 1-1	14	101	7.21429		HCN479-KOtdish 2-1	8	4	0.5
HCN479-Wtdish 1-2	13	108	8.30769		HCN479-KOtdish 2-2	3	0	0
HCN479-Wtdish 1-3	9	97	10.7778		HCN479-KOtdish 2-3	5	7	1.4
sum	36	306			sum	16	11
average		8.5			average		0.6875
	#DAPI	#MRNA				#DAPI	#MRNA
HCN479Wtdish3-1	6	39	6.5		HCN479-KOtdish 4-1	3	7	2.33333
HCN479Wtdish3-2	5	43	8.6		HCN479-KOtdish 4-2	3	0	0
HCN479Wtdish3-3	6	46	7.66667		HCN479-KOtdish 4-3	12	4	0.333333
sum	17	128			sum	18	11
average		7.52941			average		0.611111
	#DAPI	#MRNA				#DAPI	#MRNA
HCN480-Wtdish 1-1	8	66	8.25		HCN480-KOtdish 2-1	4	3	0.75
HCN480-Wtdish 1-2	6	35	5.83333		HCN480-KOtdish 2-2	4	2	0.5
HCN480-Wtdish 1-3	8	55	6.875		HCN480-KOtdish 2-3	2	1	0.5
sum	22	156			sum	10	6
average		7.09091			average		0.6
	#DAPI	#MRNA				#DAPI	#MRNA
HCN480-Wtdish 3-1	5	93	18.6		HCN480-KOtdish 4-1	10	8	0.8
HCN480-Wtdish 3-2	9	114	12.6667		HCN480-KOtdish 4-2	7	0	0
HCN480-Wtdish 3-3	3	44	14.6667		HCN480-KOtdish 4-3	3	1	0.333333
sum	17	251			sum	20	9
average		14.7647			average		0.45
	#DAPI	#MRNA				#DAPI	#MRNA
HCN484-Wtdish 8-1	10	53	5.3		HCN484-KOtdish 6-1	11	2	0.181818
HCN484-Wtdish 8-2	8	59	7.375		HCN484-KOtdish 6-2	11	7	0.636364
HCN484-Wtdish 8-3	22	184	8.36364
sum	40	296			sum	22	9
average		7.4			average		0.409091
	#DAPI	#MRNA				#DAPI	#MRNA
HCN486-Wtdish 11-1	8	43	5.375		HCN486-KOtdish 11-1	35	8	0.228571
HCN486-Wtdish 11-2	6	34	5.66667		HCN486-KOtdish 11-2	19	4	0.210526
HCN486-Wtdish 11-3	14	63	4.5		HCN486-KOtdish 11-3	12	9	0.75
HCN486-Wtdish 11-4	4	19	4.75		HCN486-KOtdish 11-4	15	3	0.2
HCN486-Wtdish 11-5	7	59	8.42857		HCN486-KOtdish 11-5	9	5	0.555556
HCN486-Wtdish 11-6	12	57	4.75		sum	36	17
sum	23	135			average		0.472222
average		5.86957
	#DAPI	#MRNA				#DAPI	#MRNA
HCN486-Wtdish 11-1	3	31	10.3333		HCN486-KOtdish 11-1	19	5	0.263158
HCN486-Wtdish 11-2	2	20	10		HCN486-KOtdish 11-2	4	15	3.75
HCN486-Wtdish 11-3	11	53	4.81818		HCN486-KOtdish 11-3	16	10	0.625
HCN486-Wtdish 11-4	5	54	10.8		HCN486-KOtdish 11-4	5	8	1.6
HCN486-Wtdish 11-5	5	33	6.6		HCN486-KOtdish 11-5	17	7	0.411765
sum	21	140			sum	38	25
average		6.66667			average		0.657895
		t-test
		P value	< 0,0001
		P value summary	****
