# Supplementary material for: The switch-like expression of heme-regulated kinase 1 mediates neuronal proteostasis following proteasome inhibition
Source: eLife. 2020 Apr 24;9:e52714. doi: 10.7554/eLife.52714 (PMC7224698; doi:10.7554/eLife.52714)
Supplement: Figure 3—source data 2. [file elife-52714-fig3-data2.xlsx]

## Sheet: 3A
Protein Synthesis
		Experiment 1	Experiment 2
wt	Control	1	1		Each experiment has two Biological replicates per condition
	PI	0.115327	0.173999
GCN2 K.O.	Control	1	1
	PI	0.163332	0.168233
PERK K.O.	Control	1	1
	PI	0.0815978	0.112231
				Unpaired t test
				wt
All experiments Protein Synthesis Normalised Values (AU)				P value	0.0012
wt	Control	1		P value summary	**
	PI	0.149076		GCN2 K.O.
GCN2 K.O.	Control	1		P value	< 0,0001
	PI	0.156009		P value summary	****
PERK K.O.	Control	1		PERK K.O.
	PI	0.0856445		P value	0.0003
				P value summary	***
Protein Synthesis
	Experiment 1	Experiment 2
Control	1	1
PI	0.134653	0.335619
PI+PKR inhibitor	0.112101	0.184863
All experiments Protein Synthesis Normalised Values (AU)
C	1
PI	0.235181
PI+PKR inhibitor	0.191272
	Unpaired t test
	PKR
	P value Control vs PI+PKR inhibitor	0.0094
	P value summary	**

## Sheet: 3C
	Protein Synthesis Normalised Values (AU)
		Experiment 1	Experiment 2	Experiment 3	Experiment 4	Experiment 5	All experiments Normalised
wt	Control	1	1	1	1	1	1
	PI	0.0649471	0.136411	0.137337	0.196048	0.21658	0.150265
HRI k.o.	Control	1	1	1	1	1	1
	PI	0.911818	0.931538	0.781734	0.730832	0.827752	0.836735
	t-Test
	HRI K.O: Control vs PI
	P value	0.0378
	P value summary	*
	WT: Control vs PI
	P value	< 0,0001
	P value summary	****
	HRI K.O PI vs wt PI
	P value	< 0,0001
	P value summary	****

## Sheet: 3E
Mean of means of each experiments						Data from 3 independent experiments
wt Control	wt +PI	HRI ko Control	HRI ko+PI			wt Control	wt +PI	HRI ko Control	HRI ko+PI
1.01	0.345	1.065	0.6754			1.275	0.618	0.868	0.554
0.9858	0.3241	0.8637	0.5703			1.286	0.462	1.495	0.716
						0.992	0.733	0.804	0.596
0.9397	0.2663	0.8915	0.6625			1.379	0.41	1.494	1.111
1.106	0.2075	1.029	0.7723			1.238	0.292	1.194	0.802
						1.027	0.299	1.028	0.658
0.8736	0.5026	1.103	0.8798			1.291	0.301	1.371	0.553
1.241	0.7901	1.127	0.7813			1.168	0.465	1.168	0.48
						0.875	0.13	1.029	0.53
						1.007	0.526	0.854	0.829
						1.331	0.301	1.074	0.801
Data from 3 independent experiments						0.615	0.208	1.612	0.756
						1.156	0.405	0.98	0.569
						0.927	0.487	1.135	0.627
						1.118	0.193	0.904	0.734
wt Control vs. PI	0.6201	0,3825 to 0,8576	Yes	****		1.358	0.395	1.909	0.475
wt Control vs. ko Control	0.01282	-0,2247 to 0,2504	No	ns		1.389	0.262	0.908	0.481
wt Control vs. ko PI	0.3024	0,06488 to 0,5400	Yes	**		1.479	0.155	1.182	0.888
wt PI vs. ko Control	-0.6073	-0,8448 to -0,3697	Yes	****		0.909	0.279	0.826	0.441
wt PI vs. ko PI	-0.3177	-0,5552 to -0,08013	Yes	**		1.071	0.14	1.14	1.157
ko Control vs. ko PI	0.2896	0,05206 to 0,5271	Yes	*		1.267	0.364	1.452	0.615
						0.928	0.302	0.972	0.299
						1.639	0.379	1.524	0.553
						1.549	0.298	1.119	0.521
						1.101	0.542	1.688	0.951
						1.033	0.329	1.368	0.864
						0.652	0.369	0.954	0.796
						1.142	0.276	1.312	0.713
						0.755	0.31	1.169	0.614
						0.778	0.43	1.565	0.946
						1.416	0.694	1.101	0.905
						0.916	0.349	0.884	0.712
						1.053	0.431	0.83	0.667
						0.736	0.196	1.083	0.65
						0.858	0.141	1.021	0.704
						1.07	0.156	0.839	0.547
						0.821	0.433	0.902	0.851
						0.593	0.315	0.492	1.084
						0.833	0.37	1.102	0.769
						0.824	0.459	0.857	0.845
						1.109	0.299	0.757	0.654
						0.915	0.385	1.441	0.809
						1.301	0.417	0.875	0.827
						1.357	0.235	0.848	0.717
						0.939	0.344	1.108	0.503
						0.86	0.315	0.676	0.905
						1.794	0.327	0.775	0.842
						1.052	0.474	1.054	0.68
						1.033	0.198	0.689	1.256
						0.868	0.642	0.991	1.096
						1.117	0.161	0.94	1.099
						1.089	0.303	0.908	0.915
						1.4	0.333	1.084	0.571
						0.984	0.535	1.254	1.049
						0.965	0.539	1.347	0.138
						0.937	0.293	1.404	0.652
						0.776	0.217	1.493	0.557
						1.213	0.479	1.169	0.457
						0.906	0.585	1.021	0.9
						0.737	0.747	1.219	0.806
						0.977	0.37	1.077	0.728
						1.768	0.214	0.992	0.449
						0.927	0.31	1.092	0.538
						0.989	0.223	1.189	0.515
						0.933	0.73	0.95	0.647
						1.299	0.246	1.339	0.717
						1.211	0.265	0.995	0.466
						0.827	0.425	1.138	0.652
						1.622	0.575	1.046	0.313
						0.973	0.528	0.971	0.465
						1.897	0.366	0.822	0.337
						1.412	0.303	0.737	0.483
						0.937	0.261	0.984	0.446
						1.049	0.498	1.349	0.668
						0.625	0.129	0.788	0.697
						1.228	0.259	0.803	0.536
						1.362	0.345	0.824	0.52
						1.472	0.307	0.787	0.509
						0.623	0.293	1.26	0.473
						1.243	0.244	1.423	0.245
						1.436	0.437	1.184	0.445
						1.996	0.391	0.758	0.426
						0.982	0.258	0.912	0.3
						0.857	0.525	1.031	0.469
						0.798	0.737	0.847	0.385
						1.174	0.315	1.063	0.693
						1.368	0.108	1.009	0.952
						1.02	0.574	0.438	0.333
						0.921	0.564	1.164	0.147
						0.609	0.175	1.064	1.735
						0.771	0.052	1.149	0.905
						0.616	0.411	1.14	0.68
						1.275	0.217	0.737	1.086
						1.139	0.153	0.821	0.716
						1.302	0.504	1.723	1.229
						1.095	0.406	1.1	1.125
						0.772	0.248	1.859	0.686
						1.447	0.606	1.398	0.678
						1.621	0.146	1.413	0.62
						1.272	0.347	1.659	0.811
						1.061	0.436	1.429	0.561
						1.899	0.192	1.068	0.473
						1.623	0.116	1.774	1.241
						1.039	0.396	1.222	0.477
						0.959	0.625	1.371	0.553
						1.118	0.675	1.304	0.341
						0.888	0.133	1.336	1.355
						0.666	0.111	1.003	0.867
						0.978	0.185	1.479	0.81
						1.053	0.302	1.811	0.74
						1.44	0.321	0.937	0.7
						0.714	0.424	1.282	0.795
						1.26	0.189	1.081	1.132
						1.766	0.153	0.989	0.513
						1.291	0.396	1.068	0.568
						1.228	0.171	1.342	0.568
						1.702	0.299	1.182	0.566
						1.607	0.486	1.038	0.945
						1.299	0.18	1.051	0.653
						1.166	0.2	1.578	0.638
						0.983	0.409	1.015	0.406
						1.115	0.256	0.949	0.523
						1.299	0.162	0.774	0.575
						0.811	0.161	0.8	0.487
						1.419	0.181	1.134	1.035
						0.995	0.691	0.933	0.808
						0.968	0.32	0.75	0.826
						1.07	0.449	0.93	0.923
						0.794	0.227	0.64	0.695
						0.682	0.462	0.905	0.735
						0.59	0.399	1.103	1.029
						1.08	0.25	1.592	0.672
						1.564	0.58	1.245	0.594
						0.872	0.411	1.056	0.332
						0.474	0.602	1.332	0.566
						1.024	0.273	1.246	0.384
						1.237	0.177	0.964	0.405
						1.176	0.433	0.671	0.643
						1.341	0.296	1.183	0.692
						1.176	0.172	1	0.739
						1.078	0.303	1.227	0.514
						1.782	0.579	0.994	0.639
						1.468	0.156	1.517	0.615
						0.931	0.345	1.032	0.599
						1.674	0.224	1.007	0.619
						1.587	0.193	0.958	0.583
						1.207	0.194	0.845	0.62
						0.944	0.266	1.253	0.25
						1.012	0.519	1.371	0.326
						1.137	0.49	0.856	0.442
						1.66	0.355	1.365	0.725
						1.12	0.169	0.935	0.483
						1.611	0.246	0.993	0.613
						0.873	0.09	1.232	0.572
						1.394		1.127	0.732
						1.107	0.256	1.16	0.84
						1.089	0.358	1.047	0.801
						1.815	0.324	1.351	1.026
						0.893	0.259	0.876	1.193
						0.9	0.26	1.494	0.398
						0.902	0.185	0.774	0.686
						0.763	0.206	1.018	0.622
						1.165	0.248	1.13	0.595
						1.204	0.209	1.43	0.437
						1.375	0.17	1.029	0.833
						0.84	0.157	0.919	0.682
						1.017	0.161	1.291	0.683
						0.873	0.057	1.226	1.044
						0.803	0.187	1.044	0.645
						0.73	0.072	1.109	0.722
						0.925	0.106	1.622	0.522
						1.199	0.072	1.13	0.594
						1.129	0.116	1.1	0.505
						0.922	0.083	1.318	0.618
						0.64	0.2	1.69	0.652
						0.592	0.195	0.917	0.251
						0.934	0.233	1.076	0.67
						0.703	0.195	1.523
						0.939	0.363	1.169	0.758
						0.79	0.255	1.34	0.528
						0.644	0.098	0.896	0.676
						0.72	0.304	0.86	0.54
						1.101	0.088	1.004	0.693
						0.726	0.183	0.873	0.535
						1.044	0.092	1.168	0.592
						0.972	0.248	1.087	0.551
						1.048	0.213	0.597	0.676
						0.952	0.254	0.913	1.052
						0.825	0.106	0.78	0.854
						0.695	0.068	0.725	0.823
						0.646	0.165	0.934	0.638
						0.858	0.225	0.657	0.688
						1.045	0.308	0.997	0.792
						0.907	0.429	0.894	0.601
						0.71	0.479	0.786	0.718
						0.987	0.432	0.961	0.629
						0.958	0.204	1.036	0.794
						0.723	0.308	0.992	0.615
						0.739	0.594	1.014	0.547
						0.82	0.41	1.846	0.834
						0.929	0.345	0.762	0.745
						0.942	0.529	0.55	0.52
						0.888	0.074	0.916	0.754
						1.136	0.343	0.927	0.615
						0.967	0.349	0.662	0.43
						0.997	0.452	0.787	0.294
						0.818	0.446	0.701	0.427
						0.809	0.427	0.535	0.695
						0.684	0.381	0.757	0.625
						0.478	0.132	1.018	0.657
						0.699	0.451	0.941	0.534
						1.042	0.546	1.703	0.552
						0.564	0.488	0.955	0.407
						0.732	0.313	1.15	0.448
						0.623	0.14	1.776	0.759
						0.441	0.28	1.361	0.442
						1.059	0.38	1.102	0.33
						0.707	0.29	1.414	0.466
						0.567	0.358	1.105	0.467
						0.795	0.326	1.112	0.466
						0.499	0.516	0.854	0.759
						0.546	0.215	1.269	0.512
						0.608	0.244	1.4	0.348
						0.701	0.225	1.079	0.58
						2.139	0.227	1.319	0.722
						1.286	0.322	1.144	0.391
						1.081	0.238	1.443	0.183
						1.494	0.29	0.98	0.394
						1.098	0.429	1.186	0.518
						1.259	0.228	1.305	0.455
						0.85	0.164	1.062	0.867
						1.201	0.281	0.762	0.676
						0.925	0.23	0.847	0.734
						0.746	0.165	1.079	0.413
						0.615	0.215	1.346	0.74
						0.974	0.291	0.844	0.442
						0.906	0.302	0.999	0.487
						1.184	0.311	1.113	0.523
						0.894	0.345	1.427	0.558
						0.648	0.386	1.552	0.65
						1.021	0.528	1.06	0.46
						0.968	0.404	0.951	0.622
						0.978	0.28	1.159	0.478
						0.708	0.291	0.499	0.824
						0.699	0.276	1.081	0.473
						1.037	0.333	0.956	0.673
						0.962	0.271	1.003	0.678
						1.122	0.307	0.92	0.51
						0.947	0.289	0.98	0.477
						1.057	0.191	0.7	0.186
						1.216	0.298	1.029	0.528
						1.057	0.31	1.483	0.492
						1.053	0.317	1.439	0.486
						0.968	0.512	1.103	0.576
						0.722	0.468	1.298	0.462
						0.527	0.275	1.224	0.627
						0.672	0.372	0.59	0.739
						0.587	0.321	0.617	0.564
						1.129	0.235	0.864	0.987
						0.692	0.355	1.405	0.715
						0.848	0.372	1.732	0.511
						0.803	0.357	0.622	0.484
						1.232	0.269	1.161	0.688
						0.958	0.569	0.931	0.449
						0.801	0.297	0.956	0.323
						1.021	0.239	0.931	0.499
						0.949	0.607	0.745	0.656
						0.929	0.324	0.984	0.619
						0.751	0.67	0.942	0.425
						0.527	0.447	0.808	0.529
						0.635	0.369	0.859	0.629
						0.696	0.454	0.555	0.565
						0.921	0.405	0.881	0.5
						0.703	0.612	0.561	0.544
						0.675	0.26	0.75	0.552
						0.801	0.284	0.821	0.716
						0.714	0.223	1.331	0.519
						0.716	0.344	0.752	0.645
						0.623	0.267	1.261	0.5
						0.728	0.238	0.816	0.495
						1.698	0.3	1.304	0.691
						1.3	0.394	0.929	0.397
						1.547	0.635	0.603	0.85
						1.117	0.313	0.891	0.774
						1.392	0.458	0.697	0.644
						1.276	0.302	1.084	0.474
						1.418	0.327	0.949	0.655
						1.366	0.186	0.989	0.846
						1.236	0.374	0.922	0.392
						1.07	0.325	1.629	0.391
						1.236	0.48	1.214	0.774
						1.096	0.498	0.798	0.487
						0.755	0.382	0.661	0.529
						0.929	0.471	1.171	0.726
						0.921	0.813	0.782	0.587
						0.867	0.656	1.223	0.531
						1.035	0.199	0.889	0.339
						0.788	0.356	1.234	0.516
						0.928	0.483	0.509	0.617
						0.838	0.35	0.722	0.381
						0.82	0.277	0.578	0.328
						0.796	0.091	0.778	0.422
						0.744	0.668	0.753	0.584
						0.848	0.689	0.774	0.502
						0.704	0.452	0.715	0.32
						0.705	0.399	1.202	0.632
						0.816	0.451	0.689	0.521
						0.726	0.291		0.707
						0.705	0.43	1.449	0.43
						0.902	0.342	1.28	0.455
						0.53	0.288	0.883	0.475
						0.848	0.277	1.029	0.402
						0.613	0.292	1.507	0.274
						0.44	0.381	0.938	0.556
						0.698	0.274	0.968	0.705
						1.035	0.419	0.986	0.619
						1.114	0.345	0.844	0.453
						0.526	0.282	0.681	0.659
						1.164	0.252	1.17	0.737
						0.887	0.267	0.978	0.93
						0.788	0.239	0.767	0.554
						0.95	0.327	1.127	0.781
						1.036	0.26	1.574	0.651
						0.993	0.486	1.046	0.57
						0.71	0.148	0.823	0.429
						0.554	0.166	0.889	0.382
						0.819	0.369	1.001	0.769
							0.142	1.168	0.453
						1.921	0.327	0.992	0.62
						0.883	0.442	1.596	0.758
						1.614	0.469	1.158	0.421
						1.309	0.268	0.71	0.572
						1.085	0.341	0.948	0.741
						1.612	0.601	0.697	0.515
						1.792	0.417	0.693	0.528
						0.959	0.542	0.775	0.492
						1.127	0.359	0.89	0.642
						0.989	0.472	0.895	0.389
						1.088	0.562	0.748	0.228
						1.121	0.45	0.795	0.361
						0.853	0.387	0.854	0.291
						0.868	0.542	0.605	0.448
						0.961	0.342	0.658	0.642
						1.032	0.393	0.327	0.417
						1.268	0.101	0.999	0.375
						1.399	0.378	0.722	0.591
						1.122	0.307	0.749	0.552
						1.02	0.394	1.351	0.449
						1.189	0.364	0.626	0.461
						0.61	0.449	0.458	0.533
						1.168	0.314	1.753	0.747
						0.913	0.308	1.113	0.746
						1.012	0.408	0.698	0.529
						0.837	0.436	0.987	0.712
						0.701	0.24	1.119	0.509
						0.653	0.281	1.403	0.494
						0.653	0.156	1.001	0.606
						0.563	0.375	1.744	0.641
						0.954	0.329	1.14	0.657
						0.733	0.281	1.092	0.473
						1.234	0.166	1.247	0.601
						1.046	0.093	1.041	0.697
						1.104	0.338	0.835	0.429
						0.673	0.2	0.922	0.483
						0.738	0.537	1.177	0.401
						0.542	0.448	0.765	0.396
						1.019	0.233	1.225	0.36
						1.272	0.163	0.774	0.407
						0.842	0.483	0.806	0.446
						1.235		0.947	0.426
						1.378		1.308	0.44
						0.889		1.031	0.491
						0.674		0.82	0.79
						0.755		1.049	0.728
						1.566		1.066	0.597
						0.712		0.816	0.85
						1.099		0.592	0.725
						0.865		1.352	0.792
						1.565		0.557	0.574
						0.764		0.647	0.466
						1.795		0.605	0.759
						0.869		1.093	0.415
						0.679		0.759	0.556
						1.262		0.596	0.612
						1.95		1.144	0.63
						0.813		0.743	0.737
						1.474		0.74	0.9
						1.492		0.449	0.547
						1.097		1.209	0.473
						1.085		0.53	0.477
						1.404		0.738	0.457
						1.105		0.964	0.726
						1.305		0.932	0.648
						1.09		1.102	0.846
						1.118		1.731	0.677
						0.885		0.712	0.584
						0.635		0.728	1.018
						1.337		0.801	0.576
						0.891		0.798	0.586
						1.031		0.748	0.41
						0.965		0.633	0.425
						0.347		0.966	0.478
						1.218		0.807	0.508
						1.757		0.664
						0.583		1.353
						0.789		1.04
						0.718		1.009
						0.948		0.898
						1.192		0.938
						0.717		1.106
						1.317		0.677
						1.469		0.71
						0.84		0.786
						0.787		0.939
						0.853		1.033
						0.843		0.676
						0.488		1.059
						0.918		0.697
						1.052		0.789
						1.069		0.518
						1.151		0.829
						1.452		0.815
						1.53		0.928
						1.202		1.036
						0.489		0.672
						1.729		0.497
						1.438		0.995
						1.172		0.483
						0.909		0.754
						1.326		0.975
						0.928		1.071
						1.099		0.76
						0.832		0.439
						0.762		0.742
						0.911		0.446
						0.619		0.565
						1.409		0.919
						1.466		0.867
						0.722		0.83
						1.299		1.34
						0.991		1.117
						1.131		0.736
						0.961		0.638
						0.552		1.005
						1.021		0.797
						0.707		0.819
						0.8		0.681
						0.936		0.925
						1.023		0.856
						0.907		0.727
						1.048		0.88
						1.227		1.142
						1.361		0.836
						1.601		1.245
						0.725		0.757
						0.808		1.081
						0.667		1.061
						1.139		0.682
						1.407		0.795
						0.96		0.736
						0.887		0.772
						0.55		0.73
						0.708		0.653
						0.976		0.575
						1.015		0.734
						0.633		0.696
						1.405		0.605
						0.993		0.807
						1.03		0.739
						0.731		0.91
						0.619		0.638
						1.238		0.578
						1.312		0.963
						0.932		0.604
						1.161		0.631
						0.813		1.005
						0.928		0.727
						0.895		0.655
						0.896		0.722
						1.098		0.898
						0.665		0.623
						0.966		0.726
						0.789		0.942
						0.897		1.021
						0.933		0.852
						0.677		0.926
						0.721		0.835
						0.813		0.642
						0.871		0.679
						0.699		0.72
						1.127		1.378
						1.084		0.852
						1.01		0.98
						0.751		0.817
						1.12		1.423
						0.971		1.031
						0.845		1.179
						0.362		0.83
						0.907		1.498
						0.791		0.998
						0.659		0.788
						1.131		1.139
						1.311		0.998
						0.652		1.211
						0.634		1.233
						0.682		0.671
						0.958		0.64
						1.03		0.363
						0.818		0.822
						1.247		1.008
						0.813		0.649
						0.686		0.508
						1.245		0.384
						1.239		0.718
						0.976		0.525
						1.067		0.622
						1.431		0.707
						1.337		0.733
						1.309		1.152
						0.819		1.314
						0.935		0.667
						1.082		0.48
						1.196		0.714
						1.078		0.605
						0.683		0.387
						0.988		0.473
						0.899		0.881
						0.723		0.648
						0.873		0.673
						0.791		0.49
						0.943		0.413
						0.649		0.587
						1.204		0.389
						0.97		0.528
						0.75		0.61
						0.767		0.33
						1.549
						1.552
						0.982
						0.737
						1
						0.954
						1.122
						0.719
						0.523
						0.691
						0.806
						0.635
						0.847
						0.989
						0.618
						0.676
						0.53
						0.893
						0.66
						0.435
						0.445
						0.731
						0.637
						0.828
						1.39	0.197
						1.117	0.82	1.234	0.731
						1.013	0.212	1.048	0.581
						0.753	0.233	0.735	0.739
						0.763	0.212	0.687	0.674
						0.701	0.452	1.43	0.997
						0.624	0.148	0.949	0.697
						0.899	0.188	0.647	0.236
						0.738	0.18	0.76	0.906
						0.823	0.143	0.649	0.652
						0.81	0.16	0.665	0.87
						0.877	0.176	0.783	0.757
						1.366	0.245	0.736	0.978
						0.729	0.368	0.797	0.678
						0.814	0.381	1.06	0.718
						0.976	0.152	0.974	0.554
						1.057	0.387	0.689	0.528
						0.91	0.16	1.336	0.671
						0.803	0.237	1.376	0.957
						0.827	0.192	0.606	0.73
						0.959	0.211	0.72	0.582
						1.219	0.166	1.047	1.028
						0.99	0.115	0.873	0.462
						0.523	0.52	1.134	0.973
						0.683	0.206	1.185	0.772
						0.662	0.172	0.689	0.79
						0.732	0.245	0.634	0.518
						0.772	0.276	0.612	0.603
						0.859	0.196	0.751	0.57
						0.781	0.335	0.771	0.845
						1.329	0.191	0.998	0.769
						0.79	0.472	0.651	0.571
						1.028	0.335	0.591	0.569
						0.731	0.189	0.712	1.023
						0.998	0.921	0.662	0.503
						0.884	0.228	0.714	0.492
						0.779	0.116	0.659	0.923
						0.85	0.197	0.842	0.695
						1.229	0.329	0.936	0.669
						0.65	0.146	1.01	0.753
						0.814	0.168	0.797	0.917
						0.661	0.183	0.527	0.397
						0.634	0.203	0.549	0.607
						0.893	0.261	1.337	0.839
						0.996	0.228	1.353	0.52
						0.695	0.599	0.972	0.979
						0.764	0.194	0.849	1.312
						1.319	0.237	0.723	1.226
						0.569	0.181	0.692	0.418
						0.903	0.289	0.534	0.551
						0.809	0.316	0.743	0.421
						1.657	0.172	0.779	0.458
						1.443	0.185	0.717	0.874
						0.827	0.394	0.563	0.62
						1.225	0.193	0.652	0.39
						0.666	0.115	0.708	0.202
						1.082	0.379	1.247	0.42
						1.253	0.138	0.8	0.224
						1.48	0.38	0.784	0.633
						1.693	0.555	0.71	0.398
						1.209	0.13	1.035	0.837
						1.089	0.154	0.851	0.975
						0.934	0.153	0.599	0.769
						0.932	0.14	0.532	0.681
						1.241	0.174	0.759	0.362
						0.817	0.183	0.753	0.721
						1.24	0.196	0.639	0.576
						1.607	0.285	0.612	0.923
						1.127	0.204	1.068	0.778
						0.719	0.157	0.755	0.684
						1.145	0.254	0.818	0.471
						0.945	0.172	0.544	0.401
						0.883	0.322	0.679	0.575
						1.348	0.188	0.664	0.843
						1.178	0.606	0.644	0.485
						1.168	0.151	0.757	0.851
						1.365	0.516	0.542	0.628
						0.978	0.256	0.59	0.843
						1.106	0.197	0.482	0.72
						1.315	0.432	0.758	0.445
						1.094	0.844	0.711	0.786
						0.877	0.09	0.382	0.487
						1.395	0.229	0.577	0.943
						1.463	0.433	0.748	0.639
						1.064	0.195	0.616	0.582
						1.042	0.275	0.813	0.598
						0.899	0.141	0.635	0.62
						1.447	0.195	0.926	0.682
						0.885	0.208	0.873	0.352
						0.951	0.314	0.469	0.562
						1.213	0.367	0.711	0.619
						0.392	0.151	0.628	0.354
						1.386	0.171	0.589	0.817
						1.085	0.178	1.224	0.635
						1.004	0.164	1.001	0.33
						1.524	0.209	0.928	0.33
						1.701	0.132	1.078	0.388
						0.876	0.186	0.968	0.844
						0.98	0.552	0.52	0.881
						0.958	0.688	0.931	0.404
						1.543	0.216	1.315	0.527
						0.69	0.233	0.749	0.735
						0.771	0.284	0.655	0.702
						1.469	0.684	0.867	0.57
							0.248	0.759	0.287
						1.177	0.282	0.91	0.544
						1.454	0.29	0.643	0.936
						1.441	0.222	0.771	0.375
						1.095	0.145	1.277	0.705
						1.364	0.334	0.992	0.581
						1.287	0.18	0.653	0.43
						1.026	0.199	1.174	0.287
						1.226	0.253	0.971	0.758
						1.844	0.23	0.867	0.905
						1.106	0.45	1.254	0.581
						1.082	0.626	0.717	0.441
						1.317	0.211	0.729	0.536
						1.204	0.134	0.811	0.66
						1.541	0.407	0.634	1.336
						1.313	0.174	0.637	0.726
						0.664	0.141	0.435	0.67
						0.324	0.3	0.949	0.655
						1.233	0.167	0.647	0.504
						1.206	0.118	0.832	0.203
						1.137	0.225	1.136	0.551
						1.284	0.169	0.802	0.564
						1.134	0.136	0.779	0.395
						1.626	0.251	0.468	0.534
						1.391	0.307	0.678	0.751
						1.671	0.253	0.811	0.693
						0.849	0.145	0.741	0.484
						1.46	0.362	0.616	1.329
						1.454	0.756	0.455	0.78
						1.479	0.162	0.628	0.715
						1.36	0.48	0.555	0.659
						1.357	0.21	0.58	0.639
						1.234	0.192	0.778	0.199
						1.45	0.203	0.747	0.639
						1.158	0.2	1.033	0.416
						1.288	0.213	0.685	0.568
						0.922	0.168	0.742	0.962
						1.447	0.245	0.806	0.791
						1.047	0.19	1.231	1.242
						0.848	0.088	0.705	0.456
						1.151	0.279	0.727	0.449
						1.23	0.103	0.518	0.624
						1.278	0.235	0.656	0.735
						0.974	0.159	0.652	0.701
						1.004	0.531	0.586	1.137
						1.49	0.554	1.016	0.606
						1.363	0.494	0.544	0.73
						1.142	0.383	0.97	0.687
						1.281	0.103	1.082	0.65
						1.353	0.33	0.894	0.884
						1.345	0.231	1.121	0.873
						1.177	0.15	0.767	0.89
						0.55	0.228	0.673	0.483
						1.058	0.419	0.813	0.656
						0.962	0.208	0.977	0.791
						0.973	0.22	0.652	0.651
						0.873	0.827	0.863	0.42
						1.036	0.061	0.716	0.627
						1.435	0.325	0.866	0.648
						1.018	0.338	0.544	0.954
						1.245	0.255	0.859	0.95
						1.281	0.124	0.664	0.968
						1.19	0.262	0.992	0.523
						1.32	0.147	0.954	0.283
						1.047	0.14	0.501	0.603
						1.173	0.22	1.108	0.949
						0.907	0.192	0.725	0.664
						1.125	0.531	0.81	0.38
						1.327	0.197	0.972	0.641
						1.401	0.223	0.89	0.604
						1.042	0.244	0.911	0.535
						1.07	0.382	1.037	0.596
						1.091	0.244	0.694	0.517
						0.878	0.188	0.92	0.749
						0.859	0.268	1.299	0.437
						1.115	0.378	0.784	0.503
						0.78	0.135	0.948	1.151
						0.777	0.265	0.759	0.568
						0.882	0.315	0.854	0.723
						1.131	0.238	0.497	0.958
						1.178	0.21	0.485	0.578
						1.342	0.214	0.713	1.324
						1.011	0.36	0.972	1.106
						0.921	0.269	0.691	0.571
						0.799	0.235	0.591	0.654
						0.826	0.172	0.559	1.217
						0.802	0.277	0.783	0.643
						0.856	0.1	0.679	1.24
						1.253	0.267	0.63	0.787
						1.289	0.156	0.749	0.552
						0.865	0.229	0.754	0.518
						1.02	0.147	0.93	0.796
						0.807	0.163	1.024	0.724
						0.972	0.151	0.764	0.735
						1.053	0.289	0.895	0.68
						0.916	0.181	0.734	0.625
						1.19	0.282	0.704	0.554
						0.937	0.203	0.827	0.649
						1.262	0.343	0.731	0.605
						0.977	0.251	0.974	0.943
						1.096	0.27	0.753	0.408
						1.34	0.497	0.629	0.447
						1.055	0.214	0.406	0.381
						0.863	0.254	0.607	0.793
						0.443	0.975	0.507	0.478
						1.385	0.336	0.619	0.512
						1.238	0.288	0.704	0.531
						1.612	0.373	0.829	1.025
						1.138	0.163	0.838	0.609
						1.323	0.238	0.839	0.584
						1.218	0.255	0.69	0.676
						0.983	0.374	0.842	0.332
						0.744	0.144	0.638	0.425
						1.05	0.224	0.52	0.29
						0.787	0.314	0.628	0.83
						0.859	0.467	1.107	0.544
						1.176	0.205	0.563	0.747
						0.816	0.167	0.708	1.091
						0.878	0.164	0.609	0.539
						1.224	0.209	0.748	0.655
						0.721	0.262	0.754	0.858
						0.626	0.196	0.73	0.5
						0.823	0.156	0.514	0.883
						0.83	0.159	0.778	0.526
						0.837	0.144	0.663	0.754
						0.927	0.398	0.689	0.571
						0.873	0.196	0.746	0.486
						0.91		0.722	0.557
						0.828	0.179	0.996	0.62
						0.863	0.121	0.669	0.334
						1.225	0.154	0.627	0.519
						1.273	0.199	0.624	0.566
						0.817	0.162	0.693	1.059
						0.865	0.123	0.985	0.282
						0.887	0.271	1.339
						1.444	0.191	1.111	0.782
						1.025	0.231	0.748	0.625
						0.785	0.18	0.945	1.111
						0.837	0.361	1.424	0.63
						0.797	0.44	0.89	1.135
						0.75	0.17	0.825	1.042
						0.887	0.168	0.703	1.112
						0.69	0.218	0.712	0.535
						1.743	0.269	0.686	0.829
						1.095	0.15	1.064	0.874
						1.379	0.194	0.527	0.784
						1.137	0.209	1.17	1.208
						1.181	0.14	1.062	0.993
						1.173	0.233	0.845	0.714
						1.018	0.259	0.688	0.535
						1.364	0.205	1	1.221
						1.188	0.169	0.853	1.346
						1.643	0.284	1.156	1.307
						0.913	0.153	1.133	1.256
						1.345	0.304	1.175	0.788
						1.205	0.233	0.639	0.559
						1.29	0.125	0.891	0.86
						1.196	0.212	1.163	1.134
						1.362	0.245	1.213	0.983
						0.974	0.159	0.466	0.895
						1.075	0.156	1.043	0.878
						1.223	0.172	0.832	0.807
						0.954	0.333	0.645	0.616
						1.087	0.167	0.817	0.49
						1.015	0.676	0.653	0.462
						1.097	0.16	0.983	0.927
						1.085	0.117	0.671	0.586
						1.066	0.199	0.909	0.692
						1.408	0.266	0.78	1.42
						1.57	0.228	1.01	1.439
						1.193	0.157	0.556	0.454
						1.197	0.158	0.651	0.734
						0.967	0.14	0.514	1.064
						1.11	0.131	1.512	0.466
						0.869	0.151	1.249	0.56
						1.159	0.181	0.693	0.707
						1.158	0.345	0.623	0.592
						0.945	0.427	0.859	0.627
						1.093	0.145	0.97	0.55
						1.013	0.165	1.122	0.491
						0.978	0.184	0.801	0.387
						1.324	0.222	0.71	0.833
						1.26	0.128	0.736	0.86
						1.034	0.138	0.67	0.56
						1.427	0.21	0.576	0.52
						1.134	0.251	0.627	0.765
						1.15	0.149	0.423	0.864
						1.125	0.121	0.828	0.903
						1.756	0.143	1.021	1.179
						1.54	0.158	1.074	1.19
						1.048	0.222	0.613	0.73
						1.294	0.233	1.073	0.552
						0.925	0.189	0.888	0.74
						1.08	0.185	0.881	0.571
						0.239	0.209	0.768	0.458
						0.862	0.164	0.978	0.887
						1.628	0.163	1.023	0.571
						1.043	0.152	0.903	0.492
						1.183	0.211	0.601	0.727
						1.086	0.397	1.063	0.712
						1.441	0.268	0.933	0.697
						1.094	0.157	1.094	0.62
						0.834	0.079	1.347	0.538
						0.684	0.194	1.291	0.392
						0.446	0.373	0.82	1.056
						1.36	0.345	0.684	0.634
						1.625	0.233	0.845	0.441
						1.602	0.236	1.106	0.908
						0.871	0.322	0.768	0.737
						1.286	0.321	0.83	0.603
						1.058	0.21	1.018	0.817
						0.981	0.137	1.366	0.719
						0.836	0.177	0.75	0.907
						1.001	0.215	0.739	0.871
						1.288	0.408	0.722	1.164
						0.986	0.164	1.035	0.676
						1.227	0.154	1.12	0.977
						0.755	0.261	0.761	0.732
						1.381	0.157	0.748	0.508
						1.11	0.18	0.976	1.14
						0.783	0.309	0.878	1.065
						0.818	0.135	0.8	0.661
						0.825	0.305	0.535	1.051
						0.816	0.329	0.471	0.909
							0.239	0.935	1.015
							0.148	0.483	0.499
							0.211	1.217	0.617
							0.198	0.861	0.725
							0.132	0.813	0.882
							0.147	1.16	0.612
							0.133	0.92	0.655
							0.155	0.808	0.656
							0.157	1.062	1.044
							0.165	0.681	0.462
							0.416	1.131	0.682
							0.19	0.653	0.574
							0.181	0.56	0.634
							0.213	0.577	1.049
							0.474	0.723	1.423
							0.168	0.709	1.114
							0.212	0.761	1.253
							0.199	1.328	1.325
							0.233	0.477	1.099
							0.22	0.99	0.765
							0.234	0.628	0.993
							0.215	0.643	0.499
							0.13	0.994	0.899
							0.138	0.532	1.081
							0.118	0.547	0.467
							0.157	1.405	0.778
							0.14	1.151	0.421
							0.155	0.988	0.798
							0.149	1.208	0.801
							0.164	1.27	1.355
							0.065	0.989	0.645
							0.222	0.758	0.43
							0.132	1.009	0.458
							0.15	1.224	0.587
							0.209	0.849	0.554
							0.192	1.037	0.873
							0.376	1.115	0.535
							0.368	1.584	0.56
							0.186	0.777	0.421
							0.163	0.909	0.595
							0.165	1.034	0.567
							0.283	0.765	0.606
							0.303	0.675	0.831
							0.223	0.797	0.893
							0.209	0.954	0.641
							0.193	1.589	0.668
							0.199	1.235	0.502
							0.202	1.567	0.786
							0.102	1.064	0.63
							0.178	1.548	0.533
							0.239	1.162	0.777
							0.085	1.148	0.491
							0.141	1.122	0.74
							0.233	1.555	0.906
							0.116	0.94	0.828
							0.118	0.969	0.927
							0.157	0.937	0.538
							0.167	1.103	0.634
							0.179	0.863	1.392
							0.332	1.024	0.501
							0.134	1.414	0.562
							0.179	0.96	1.142
							0.349	1.04	0.481
							0.126	0.719	0.44
							0.297	0.762	1.003
							0.356	0.758	1.106
							0.142	0.912	0.662
							0.166	1.387	0.333
							0.146	0.672	0.619
							0.236	1.544	1.089
							0.174	0.94	1.171
							0.195	1.014	0.483
								1.352	1.042
								0.989	0.528
								1.224	0.946
								1.262	1.088
								0.897	0.838
								1.279	1.121
								0.642	0.893
								0.934	0.878
								0.731	0.718
								0.893	0.688
								1.011	0.606
								0.798	0.517
								0.646	0.396
								0.958	0.848
								0.873	1.097
								0.779	0.92
								0.948	0.416
								0.619	0.486
								0.548	0.448
								0.933	0.471
								1.247	1.299
								0.838	0.866
								0.981	0.581
								0.717	0.521
								0.984	0.647
								0.923	0.416
								0.825	0.863
								0.689	0.887
								0.967	0.7
								0.885	0.344
								1.058	0.566
								1.014	1.075
								1.217	0.646
								1.319	0.496
								1.266	0.904
								1.225	0.699
								1.393	0.33
								0.943	0.548
								1.664	0.577
								1.011	0.642
								1.151	0.931
								1.489	1.276
								1.551	0.92
								1.199	0.519
								1.116	1.19
								0.953	1.093
								1.468	0.485
								1.338	0.986
								1.222
								1.265
								1.298
								1.049
								1.675
								1.444
								1.579
								1.649
								1.49
								0.967
								1.178
								0.818
								1.179
								1.701
								0.922
								0.814
								0.831
								1.048
								1.135
								1.438
								1.294
								1.108
								1.596
								0.65
								1.055
								1.278
								1.407
								1.471
								0.951
								1.636
								1.185
								1.165
								1.121
								0.857
								0.988
								1.391
								1.278
								0.682
								1.074
								0.991
								0.81
								0.75
								1.142
								0.727
								1.103
								1.236
								0.912
								0.943
								0.887
								0.782
								1.195
								1.22
								0.93
								0.998
								0.994
								1.487
								1.307
								0.926
								0.902
								0.782
								1.05
								1.166
								0.789
								1.244
								1.136
								1.195
								1.284
								0.989
								0.997
								1.108
								1.041
								1.122
								1.584
								0.73
								0.668
								0.983
								0.674
								1.445
								1.023
								0.868
								1.009
								1.038
								1.119
								1.138
								0.78
								0.981
								0.891
								1.206
								0.967
								1.109
								1.34
								1.432
								1.141
								1.005
								1.47
								0.96
								0.712
								0.792
								0.854
								0.936
								0.845
								0.997
								0.86
								0.902
								0.867
								0.786
								0.864
								1.086
								0.984
								0.367
								0.47
								0.518
								0.775
								0.459
								0.367
								0.766
								0.587
								0.729
								1.267
								1.177
								1.369
								0.971
								1.368
								1.452
								1.513
								0.932
								1.491
								1.228
								1.377
								1.445
								1.448
								0.901
								0.865
								1.013
								1.142
								0.848
								1.296
								1.374
								1.246
								0.925
								1.304
								1.285
								1.064
								1.109
								0.974
								1.028
								1.364
								1.079
								1.481
								1.2
								1.113
								0.971
								1.204
								0.891
								1.035
								1.576
								0.777
								0.965
								0.958
								1.443
								0.917
								0.973
								0.67
								1.182
								0.918
								1.287
								1.193
								1.405
								1.426
								0.987
								1.048
								0.921
								1.047
								1.159
								0.916
								0.823
								1.078
								1.147
								1.172
								1.085
								1.45
								1.102
								0.916
								1.244
								1.312
								1.411
								1.372
								1.05
								0.978
								0.655
								1.012
								1.307
								0.948
								0.799
								0.973
								0.693
								1.189
								1.155
								1.196
								1.091
								1.212
								1.024
								1.424
								1.23
								1.107
								1.215
								1.087
								1.354
								0.969
								1.057
								0.931
								1.363
								0.961
								0.894
								0.964
								1.177
								1.236
								1.107
								0.684
								0.517
								1.22
								0.719
								0.937
								0.873
								0.623
								1.422
								1.328
								0.407
								1.104
								1.18
								0.984
								1.25
								0.888
								1.366
								0.944
								0.938
								0.935
								0.798
								0.802
								0.873
								1.073
								1.102
								0.997
								1.09
								0.903
								0.888
								0.819
								1.277
								1.014
								1.5
								0.883
								0.971
								1.393
								0.831
								1.158
								0.987
								0.952
								1.344
								0.972
								0.965
								0.988
								0.858
								1.229
								1.351
								1.603
								0.647
								0.991
								1.227
								0.976
								1.572
								0.952
								1.109
								0.764
								1.262
								0.553
								1.512
								1.459
								1.177
								1.081
								0.736
								0.941
								1.501
								0.985
								0.724
								0.924
								1.147
								1.486
								1.042
								0.925
								0.921
								1.15
								1.22
								0.856
								0.941
								0.941
								0.958
								1.022
								0.797
								1.309
								1.016
								1.076
								1.184
								0.869
								0.963
								0.57
								0.625
								0.848
								1.307
								1.271
								1.036
								1.311
								1.084
								0.762
								1.002
								0.739
								1.278
								1.041
								1.091
								1.283
								1.229
								0.9
								1.105
								1.136
								0.964
								0.938
								0.998
								1.002
								1
								1.388
								0.586
								0.852
								0.864
								1.187
								0.912
								0.847
								0.945
								1.203
								0.392
								0.819
								1.053
								0.837
								0.766
								0.952
								0.69
								1.303
								0.946
								0.808
								0.829
								0.578
								0.975
								0.97
								0.738
								0.649
								0.703
								0.823
								0.743
								1.301
								1.435
								1.049
								0.436
								0.649
								1.19
								0.837
								0.934
								0.75
								0.924
								0.785
								0.793
						0.882	1.037	1.035	1.051
						1.11	0.533	1.276	1.055
						1.053	0.719	1.18	1.343
						1.143	0.321	1.532	1.247
						0.964	0.293	1.351	0.993
						1.064	0.431	1.303	0.692
						1.088	0.483	1.156	0.936
						1.197	0.952	1.295	1.114
						1.111	0.754	1.481	0.914
						1.269	0.635	1.184	0.927
						1.192	0.944	1.06	0.916
						1.097	0.721	1.217	1.006
						1.292	0.421	1.181	0.866
						0.947	0.524	1.368	0.985
						0.918	0.516	1.36	1.252
						1.035	0.4	1.083	1.095
						0.814	0.555	1.267	1.187
						1.21	0.266	0.866	0.992
						0.799	0.489	1.122	0.806
						0.891	0.404	1.598	0.844
						1.088	0.596	1.357	0.782
						0.916	0.669	1.053	1.132
						0.85	0.68	1	1.12
						1.053	0.363	0.985	0.931
						1.006	0.22	0.95	0.986
						0.865	0.378	1.066	0.709
						0.836	0.26	1.192	0.919
						0.789	0.314	1.128	1.028
						0.872	0.217	1.068	0.923
						0.717	0.334	0.877	0.957
						0.978	0.373	0.964	0.859
						0.945	0.43	0.921	0.839
						0.92	0.3	1.008	0.732
						0.972	0.283	0.774	0.924
						0.929	0.35	0.757	0.916
						1.026	0.431	0.941	0.93
						1.08	0.413	0.752	0.88
						0.841	0.343	0.943	1.149
						0.966	0.583	1.227	0.749
						0.798	0.32	1.48	0.765
						0.986	0.285	1.448	0.706
						0.878	0.437	1.51	0.542
						0.972	0.3	1.405	0.975
						0.818	0.39	1.054	0.537
						0.984	0.357	1.289	0.516
						0.95	0.678	1.332	1.098
						0.985	0.41	1.225	0.617
						0.9	0.332	1.022	0.883
						0.94	0.778	1.071	0.686
						0.895	0.925	0.787	1.031
						1.185	0.427	0.784	1.011
						0.957	0.403	0.959	0.508
						1.058	0.398	0.747	0.685
						1.042	0.358	0.741	0.758
						1.018	0.916	0.763	0.856
						0.629	0.472	0.764	0.867
						0.974	0.46	0.637	0.732
						0.763	0.319		0.878
						0.735	0.39	1.501	0.807
						1.115	0.673	0.98	1.035
						1.061	0.307	1.237	0.951
						0.657	0.434	1.36	1.213
						0.673	0.524	1.54	1.023
						0.502	0.404	1.367	0.881
						0.476	0.603	1.163	0.901
						0.67	0.789	1.098	1.073
						0.825	0.402	0.994	0.788
						0.549	0.5	0.679	1.105
						0.784	0.331	1.145	1.149
						0.502	0.53	1.035	1.022
						0.876	0.669	1.288	1.048
						0.89	0.583	1.087	0.838
						0.722	0.493	1.021	0.839
						0.561	0.526	1.391	0.787
						0.997	0.596	1.16	1.155
						0.835	0.594	1.274	1.036
						1.047	0.555	0.934	1.089
						0.935	0.876	0.95	1.123
						1.142	0.678	0.978	1.035
						1.059	0.622	0.92	0.639
						0.945	0.644	0.642	0.705
						0.99	0.503	1.13	0.689
						0.881	0.389	0.928	0.782
						1.126	0.371	1.265	0.852
						1.158	0.66	0.838	0.962
						1.03	0.399	1.004	0.795
						0.925	0.962	1.19	0.938
						0.952	0.379	1.063	0.743
						0.93	0.916	1.295	0.701
						0.915	0.921	1.205	0.8
						1.04	0.458	1.194	1.101
						1.031	0.368	1.343	0.868
						0.945	0.67	1.396	0.898
						0.889	0.387	0.97	0.864
						0.761	0.426	1.198	0.707
						0.842	0.538	1.453	0.68
						0.702	0.407	1.252	0.841
						0.718	0.436	0.948	0.841
						0.856	0.388	1.108	0.957
						0.656	0.405	1.144	0.776
						0.758	0.412	1.214	0.93
						0.838	0.498	1.135	0.793
						0.944	0.384	0.933	0.706
						0.806	0.349	1.046	0.872
						0.75	0.301	1.141	0.603
						0.833	0.481	1.481	0.539
						0.838	0.408	0.697	0.673
						0.729	0.971	1.024	0.56
						0.858	0.375		0.901
						0.82	0.538		0.739
						0.705	0.454		0.856
						0.865	0.519		0.584
						0.744			0.539
						0.747	1.342		0.633
						0.92	1.001
						0.897	0.775		0.974
						0.556	1.41		0.959
						0.742	1.18		0.797
						0.828	0.777		0.722
						0.803	0.583		1.054
						0.698	0.905		1.289
						0.759	0.792		0.866
						0.753	0.663		0.723
						0.734	1.274		1.152
						0.778	1.664		0.583
						0.568	1.081		0.953
						0.534	1.078		0.858
						0.603	0.979		0.727
						0.685	1.014		0.876
						0.941	1.205		0.86
						0.89	0.616		0.791
						0.723	0.785		0.91
						0.894	0.396		1.081
						0.722	0.781		0.772
						0.72	0.545		0.962
						0.869	0.719		0.661
						0.703	0.547		0.86
						0.806	0.732		0.768
						0.607	0.803		0.925
						0.706	0.74		0.713
						0.687	0.545		0.945
						0.503	0.62		0.858
						0.703	0.859		0.847
							0.604		0.571
						1.551	0.414		0.705
						1.317	0.776		0.707
						1.56	0.508		0.579
						1.442	0.753		0.697
						1.511	1.1		0.667
						1.359	0.645		0.899
						1.182	0.766		0.855
						1.281	0.546		0.616
						1.138	1.139		0.632
						1.173	0.578		0.625
						1.279	0.933		0.278
						1.351	1.113		0.634
						1.482	0.918		0.736
						1.425	0.718		0.493
						1.447	0.576		0.904
						1.645	0.489		0.715
						1.056	0.909		0.635
						1.362	0.794		0.977
						1.258	0.652		0.759
						1.325	0.65		1.101
						1.442	0.659		1.041
						1.02	0.602		0.605
						1.073	0.642		0.851
						1.045	1.322		0.902
						0.928	0.48		1.037
						1.064	0.552		1.177
						1.171	0.575		0.934
						1.012	0.85		0.973
						1.107	0.869		0.59
						1.039	1.181		0.766
						0.759	0.467		0.649
						0.792	0.606		0.742
						0.874	1.085		0.83
						0.879	0.798		0.927
						0.795	0.686		0.922
						1.755	0.851		0.984
						1.694	0.678		0.829
						1.495	0.69		0.68
						1.587	0.582		0.845
						1.697	0.712		0.7
						1.293	0.615		0.659
						1.394	0.815		0.714
						0.929	0.473		0.619
						1.377	0.614		0.471
						1.478	0.649		0.519
						1.209			0.705
						1.696			0.607
						1.488			0.848
						1.46			0.784
						1.108			0.598
						1.329			0.626
						0.97			0.631
						0.742			0.708
						1.169			0.681
						1.211			0.652
						1.248			0.845
						1.085			0.66
						0.99			0.766
						1.076			0.528
						1.359			0.789
						1.205			0.651
						1.032
						1.134
						1.318
						1.4
						1.224
						1.471
						1.37
						1.4
						1.411
						1.648
						1.178
						0.798
						0.884
						0.616

## Sheet: 3F
	Experiment 1
	peIF2A	eif2a	peIF2a/eIF2a	Average
Control wt	3032740	3899326	0.77776	0.880407
Control wt	3278347	3334861	0.983054
Control HRI K.O	3838983	4678326	0.820589	0.775043
Control HRI K.O	3500154	4798033	0.729498
PI wt	8121832	5068861	1.6023	1.51093
PI wt	7261024	5114983	1.41956
PI HRI K.O	4175154	5220539	0.799755	0.929065
PI HRI K.O	4871933	4603225	1.05837
	Experiment 2
	peIF2A	eif2a	peIF2a/eIF2a	Average
Control wt	3381619	4073104	0.830231	0.732216
Control wt	2590962	4085397	0.634201
Control HRI K.O	3831861	4890740	0.783493	0.741228
Control HRI K.O	3532205	5053497	0.698963
PI wt	8807518	5183276	1.69922	1.65798
PI wt	6912690	4275719	1.61673
PI HRI K.O	4344205	4273083	1.01664	1.06416
PI HRI K.O	4674912	4205255	1.11168
wt	peIF2a/eIF2a	All experiments normalised
	Control	1
	PI	1.99025
PI HRI K.O	peIF2a/eIF2a
	Control	1
	PI	1.3172
	WT: Control vs PI
	P value	0.0002
	P value summary	***
	HRI K.O: Control vs PI
	P value	0.0177
	P value summary	*
