# Supplementary material for: The switch-like expression of heme-regulated kinase 1 mediates neuronal proteostasis following proteasome inhibition
Source: eLife. 2020 Apr 24;9:e52714. doi: 10.7554/eLife.52714 (PMC7224698; doi:10.7554/eLife.52714)
Supplement: Figure 4—figure supplement 1—source data 1. [file elife-52714-fig4-figsupp1-data1.xlsx]

## Sheet: E
	HRI normalised to the cero time point
	Experiment 1
		20S	20S+PI	Experiment 2
	0	1	1		20s	20S+PI
	30	0.805212	0.856367	0	1	1
	60	0.7126	0.804278	90	0.730454	0.899924
	180	0.452424	0.828605	180	0.528041	0.774523
	Correction by the HRI protein that is degraded in the presence of PI
		All Experiments Normalised
	0	1
	90	0.848849
	180	0.613886
		t-test
		0 vs 90min
		P value	0.0555
		P value summary	ns
		0 vs 180min
		P value	0.0295
		P value summary	*
