# Supplementary material for: The switch-like expression of heme-regulated kinase 1 mediates neuronal proteostasis following proteasome inhibition
Source: eLife. 2020 Apr 24;9:e52714. doi: 10.7554/eLife.52714 (PMC7224698; doi:10.7554/eLife.52714)
Supplement: Figure 4—figure supplement 2—source data 1. [file elife-52714-fig4-figsupp2-data1.xlsx]

## Sheet: A
ZsG norm on all ZsG neg	HA (all) HRI	HA (all) empty
28.3041	2.4586	1.96079
0.524289	1.31383	1.12253
29.0593	1.25421	1.19094
1.66297	1.69425	1.32495
0.873655	1.90868	0.962548
32.7453	1.17543	1.12212
0.644799	1.62014	1.01655
0.749784	1.25511	1.19582
0.551976	2.74411	0.803012
0.435467	1.86712	0.849502
18.5327	1.75378	1.18572
31.219	1.89132	0.92927
0.289831	1.51456	0.967102
1.03466	1.79954	1.28014
0.354487	1.54226	1.5718
24.5883	1.93671	0.874737
0.518688	1.44292	1.48321
0.308076	1.40353	1.3961
31.703	1.39512	1.47759
0.717777	1.06968	1.22877
4.9521	1.55847	0.844332
0.944072	1.14596	1.17342
1.20702	1.50779	1.19122
0.547815	1.35179	1.51276
34.8107	1.04798	1.18806
25.7207	1.3039	1.22372
14.7033	1.5018	1.10706
32.9723	1.03797	1.37673
0.414502	1.02209	0.943426
1.00409	1.76626	1.05069
11.3489	1.16993	0.800632
1.441	1.27825	1.21428
0.267906	1.19586	1.1202
0.930789	1.26164	1.61444
1.23022	1.3089	1.82325
0.280389	1.05696	1.21071
11.6506	1.58641	1.24719
26.4964	1.44234	1.17247
22.3306	1.3501	0.962219
16.3293	1.41132	1.11096
36.1782	1.61567	1.0504
0.956235	1.42991	1.50188
7.40886	1.59454	1.06107
1.39522	1.27715	1.35191
0.538853	1.57812	1.3311
1.3869	1.12922	1.07071
0.342644	1.18613	1.20649
0.464434	1.39163	1.04753
1.03721	3.51479	1.29795
5.0342	1.24531	0.885611
0.736661	1.37472	0.97059
32.4746	1.14264	1.35761
36.3499	1.10579	1.47628
28.5198	0.721767	1.03936
22.1859	1.91833	0.986757
0.8146	1.75173	1.78312
9.76608	1.28113	0.75566
0.860212	1.13201	1.21666
0.348086	1.21654	0.610199
0.417543	1.4627	0.663377
1.31616	1.49893	0.93641
0.554536	1.47431	1.20567
0.65024	1.04006	1.18868
36.4099	1.24912	1.17132
0.701933	1.47927	1.30583
0.277348	1.31596	2.04643
12.5981	1.46266	1.12766
7.10687	1.31108	1.07325
0.600468	1.31699	0.602485
37.5752	1.26475	0.695711
6.62835	1.64648	1.24867
2.73363	1.46988
0.978641	1.10149	1.6487
0.889659	1.61218	0.754963
31.9693	1.04732	0.763908
23.8446	1.27858	1.25536
0.735381	1.59023	0.858899
1.33537	1.21732	0.76678
0.535012	1.3231	1.06862
0.805798	1.47739	0.7358
39.6893	1.49794	1.50262
2.01586	1.6409	1.0227
30.0389	1.20755	0.915811
37.3438	1.70397	1.14752
1.13452	1.50082	1.1202
3.1835	0.907646	0.98569
		0.701128
37.9761	1.56987	0.839531
28.4974	0.918807	0.854098
0.368411	1.05581	1.15507
0.317518	1.38215	0.792549
0.346165	1.29791	1.06053
1.39458	1.24559	0.814501
1.69082	1.32905	1.21621
0.775871	1.292	0.920243
2.61392	1.63105	0.688243
0.295753	1.31051	0.619965
6.79751	1.16562	0.71791
33.3119	1.05499	0.927382
0.634236	1.16361	1.08421
0.542853	1.22717	0.747125
1.32945	0.954013	1.25938
0.408421	0.955285	0.654432
1.03625	1.27189	0.959593
5.82111	1.05048	0.747495
22.4201	1.34382	0.877076
30.8378	1.03612	0.799073
1.18141	1.03079	0.835756
0.584624	0.971246	0.845891
0.413542	1.07444	1.16267
0.336883	1.26968	0.96661
0.316558	1.38834	0.882698
0.358648	0.935466	0.924223
0.296713	1.3707	0.762472
37.2327	1.42573	0.882862
21.2726	0.772278	0.55304
1.51909	1.36348	1.08023
24.3801	1.24046	0.988193
0.826123	1.338	0.964107
1.34737	1.09492	1.18556
28.6751	0.95032	0.840393
4.31146	1.22081	1.16012
33.5428	1.20583	0.821723
34.2396	1.03912	0.814337
32.29	0.870101	1.14945
31.1134	0.803217	0.937641
0.362809	0.981792	0.717582
0.453872	1.07469	0.718854
1.35777	1.46438	0.826975
8.24571	1.03513	0.849666
0.638077	1.04104	0.830094
0.942792	1.11502	0.89907
0.44587	0.95709	0.73498
0.682888	0.903747	1.00567
1.07658	1.17079	0.909615
35.2261	0.86095	1.00686
1.92239	1.2213	1.0824
5.0486	1.06636	1.21523
34.19	1.32368	1.01946
14.8739	1.13045	0.786189
1.66681	0.905512	0.929844
32.8614	0.737113	0.687997
36.223	0.788733	0.745033
1.30608	0.972724	1.03025
1.82653	1.04047	0.826401
3.30657	1.47103	1.25089
35.9104	0.890248	1.0479
0.702413	1.38272	0.74692
13.8677	1.00268	1.23
1.82717	0.886144	1.01019
32.3604	0.943549	0.757999
1.17213	1.00268	0.990081
37.954	1.00411	0.839572
13.8623	0.936656	1.02886
27.3919	1.19541	0.78705
1.23903	1.33061	0.668219
23.3605	0.780198	1.19483
2.1146	0.986798	0.966979
0.491161	1.26882	0.878923
40.5457	0.98766	0.949253
31.7561	1.02451	1.23808
39.0677	1.06107	0.940021
32.8887	0.866736	0.737811
0.624794	1.11699	0.811013
0.865493	1.15274	0.916345
1.10779	1.44103	0.927136
0.36649	1.08749	0.736867
		0.824841
34.0932	1.15606	0.816635
1.77756	1.18823	0.695916
12.2155	0.798498	0.985567
2.4318	1.07133	0.748069
30.4113	1.02787	0.79616
30.7877	0.967143	0.786271
0.504764	0.934768	0.961604
0.40826	1.08388	0.71196
0.928709	1.09874	1.00846
0.673606	0.936533
8.34637	0.904855	1.34054
12.1678	0.76161	0.472903
9.55611	1.01228	0.821518
29.4584	0.969728	1.08421
0.36681	0.663172	1.017
0.541893	0.958773	1.1824
0.57006	0.684961	0.912077
0.953354	0.924305	0.801904
0.411941	0.980971	0.88635
0.594706	1.45724	0.83391
10.9213	1.39347	0.808675
0.32728	0.904322	0.995251
0.521248	1.10009	0.893736
0.40538	1.10304	0.720044
4.15126	1.11979	0.942934
0.559498	1.0005	0.896033
0.89414	0.917617	1.18158
1.59175	1.1982	0.853605
36.537	0.938133	0.717541
27.0491	1.068	1.09915
37.57	0.946586	0.822256
2.68994	1.05717	1.14026
30.2209	0.758738	0.577824
3.96834	1.02504	1.05778
0.346005	0.899234	0.864725
34.2121	1.4185	1.06349
3.41524	1.3787	1.05438
0.77283	0.904035	0.719839
1.01417	0.914867	0.616231
2.42924	0.885652	0.643025
33.054	0.7072	0.754634
6.82536	0.92213	1.00194
2.18102	1.00452	0.950156
14.3882	0.862058	1.10505
17.6973	1.2405	1.60299
25.1651	1.06	1.56003
9.9903	1.07211	1.25474
22.3957	0.885857	0.762184
1.04522	0.969605	0.869608
0.672646	1.57906	1.01294
0.506685	1.05376	1.45482
31.9072	1.0193	0.792015
27.6583	1.0193	1.03542
30.8879	0.882903	0.930542
0.481078	0.939528	0.772402
0.333842	0.966035	1.11769
1.17373	0.711755	0.851472
32.6491	0.775069	0.737565
23.6711	1.13308	0.788568
0.834605	1.36106	0.643928
6.44415	1.05192	1.30267
0.581423	0.950853	1.11687
1.90623	0.917617	0.812409
36.1812	1.02988	0.878143
1.82781	1.0808	0.639291
24.712	0.788979	0.614794
6.67796	1.10551	0.711222
0.73122	1.10149	0.716761
19.6135	0.865259	0.731122
16.0739	1.2044	0.752747
33.7784	1.04203	0.860745
0.77107	1.03325	1.06525
16.4082	1.11408	1.02549
1.87902	1.25544	0.916755
0.621593	0.921638	0.834197
0.470676	0.866408	0.821518
24.5816	0.79181	0.875394
0.321199	0.989342	0.799976
25.3893	0.716638	0.862386
21.086	1.12176	0.732887
37.4572	0.863043	1.14576
32.701	1.21355	0.582543
36.3569	1.14933	0.615123
15.2646	1.45937
0.85301	1.11117
25.7659	1.03805
9.10944	1.02566
1.09259	1.0474
0.597427	1.11113
33.2093	0.665798
0.491321	0.823775
4.26233	1.31888
1.90639	1.18893
0.8959	1.16172
28.6883
25.9515
39.0008
32.7266
0.433707
37.1568
1.98497
1.37202
32.3934
22.3132
5.26433
36.8267
0.786113
38.7822
35.5129
3.06988
34.1643
34.0735
3.1859
1.29728
34.9128
2.63441
34.2359
5.06029
37.6393
0.736981
6.94411
1.37506
5.44886
39.7994
32.8588
39.7888
25.9624
8.67125
27.9058
35.8752
1.74235
38.9289
3.23744
2.40763
2.15429
2.16229
38.4376
26.8072
30.4885
1.92687
3.45205
32.0698
34.4606
39.3753
22.6256
1.83549
6.05253
1.27856
0.681128
34.9585
35.783
27.1896
2.57647
0.312077
0.957195
2.66946
32.9523
0.398818
1.78924
1.29472
1.27359
0.520928
35.2936
32.0788
9.82866
2.58319
38.2644
0.874295
2.57951
35.6292
0.44763
3.16814
0.355127
1.72843
27.3051
36.1345
39.1698
1.9728
0.620793
1.16397
0.465715
3.36595
0.400899
0.875095
0.790435
26.145
1.16925
22.7482
36.0654
27.0854
0.420424
0.438508
0.708814
0.484279
0.599988
0.424745
0.414662
0.467795
37.4937
0.409861
1.69578
0.956715
1.38898
1.20622
38.8632
22.3081
33.9981
37.7501
17.6808
0.65104
1.11099
2.24535
0.48828
0.330321
4.70452
36.9632
31.5686
1.50693
4.20295
2.14293
1.30416
35.1264
17.2964
37.8765
1.27151
35.7328
32.9835
36.42
36.316
35.2725
39.3207
0.376092
1.33409
36.3075
33.4881
10.6927
1.04106
0.925028
1.93296
4.69716
29.928
1.90127
2.49837
38.138
5.90769
32.1201
34.5474
34.5813
37.4186
34.0537
0.490041
15.0235
1.14092
1.74667
37.2906
4.44173
2.18838
1.91503
1.76155
35.1368
33.0387
2.47181
9.85603
37.289
36.5828
30.692
30.6842
2.61824
29.5034
3.96225
30.9662
16.639
17.464
34.0757
2.84486
38.0679
20.9392
36.7538
1.16301
28.3278
0.547335
16.3792
1.75531
36.3317
2.79909
25.2296
39.4132
0.573421
2.09123
36.4803
1.9288
14.9293
0.418183
12.5961
39.7696
24.5268
16.0398
37.455
33.2338
37.2821
20.6292
7.63996
3.19439
6.5629
5.25249
34.8988
39.2897
35.5241
4.19927
2.84742
5.05933
39.3284
28.6528
40.0873
38.0134
16.7782
36.8164
34.742
35.9032
0.870614
7.20129
4.13094
1.44788
2.6837
39.0999
34.7335
36.9445
37.6403
1.70106
3.15085
0.60975
1.39346
4.86872
35.1957
1.00345
0.738102
2.14357
0.6504
4.52751
1.16045
1.10347
32.7783
0.797636		0.754935
		1.54645
0.596003	0.81947	1.0319
0.296624	2.06819	1.12069
1.29122	1.50565	1.23543
0.310152	1.24561	0.744174
42.3939	0.855423	0.848156
59.3245	1.10387	1.32249
33.8436	0.837914	1.77659
3.26762	1.50835	0.553511
0.293367	1.65652	1.18633
0.297375	1.24125	0.725107
0.454205	1.39101	0.991966
50.2053	0.713723	0.995392
0.315163	1.18723	1.0446
3.03187	0.814003	1.04806
0.279087	0.67386	1.01757
0.50431	1.03463	0.883278
0.28059	0.860406	0.720817
0.473996	1.52724	0.97072
0.274076	0.88795	0.712996
0.478005	0.699536	1.16789
0.495041	0.833311	1.49354
4.32209	1.72133	0.600675
0.458464	0.582058	1.11453
0.500302	0.839955	0.982035
36.7979	0.711266	0.558459
37.8305	0.555068	0.975807
0.88461	0.823449	1.77881
58.742	0.40541	1.60036
0.9753	1.90161	0.823449
2.05733	0.969578	1.35935
44.4352	1.02799	1.74801
49.2338	0.693446	0.806321
0.426897	0.972174	1.08757
0.355998	0.702477	0.810439
0.953755	0.879541	0.74234
0.373786	0.864835	0.877915
0.334203	1.00882	0.643167
0.457211	1.17201	0.991586
0.475249	0.767704	2.07567
0.477754	0.950339	1.94909
18.8068	0.914836	1.19554
4.55357	1.40378	1.19336
0.654125	0.74843	0.629534
1.64646	1.45831	1.04927
43.3842	1.58922	0.773829
40.6429	0.776493	0.682546
0.582224	0.78414	0.752375
2.4241	1.577	0.774209
0.486523	0.810404	0.819401
0.413369	0.857741	1.48734
1.5009	1.7041	0.400288
0.339714	1.01761	0.291739
0.417878	1.43572	0.629222
2.12948	1.31589	0.794452
56.5176	1.56122	0.887327
4.34789	0.446207	0.745523
21.7076	0.384475	0.768465
0.833252	1.37367	0.673514
0.754336	0.979648	0.972554
0.731788	1.25204	0.740748
0.284097	0.678636	1.68444
0.291363	1.44579	1.62752
0.758094	1.2998	1.24253
0.789911	1.09934	2.22941
0.287104	1.33665	0.81729
0.451199	1.47347	1.89075
51.117	0.80639	0.716734
1.00737	1.15713	1.54451
62.6865	1.45146	1.32949
0.600763	1.12266	1.10702
2.70819	1.27118	1.28723
50.9531	1.00034	0.752686
0.333952	1.74161	0.939923
3.06569	1.67904	0.739883
0.287104	0.596522	0.261253
0.552411	0.872863	0.55403
48.2985	0.774901	0.410704
44.0175	0.647008	0.830993
54.8087	1.24031	1.17685
58.0215	0.701439	0.467384
1.64947	0.78376	0.944906
36.1588	0.880683	0.966291
0.317668	0.758119	1.2718
0.515333	0.722927	0.947294
0.493788	1.64133	0.604758
3.42645	1.03141	0.516105
0.601765	0.988714	1.03356
14.5922	0.295061	0.689951
0.597005	1.92535	1.39655
0.302386	0.901237	0.978817
0.406855	0.894766	0.874143
0.286352	1.21713	0.802895
0.320173	0.697909	1.21304
1.51794	0.673514	1.24606
0.283095	0.838709	1.09204
0.283847	1.01646	0.819643
0.296874	1.12453	1.13325
0.351739	0.97553	0.5959
50.8394	0.791199	0.696525
51.7881	0.679535	1.04276
1.32854	0.423092	0.950754
0.791414	0.698429	0.750783
0.319171	1.41091	0.635036
0.751079	0.955668	0.691473
0.346478	0.537351	0.829989
0.853544	0.973627	1.64365
42.5602	0.441397	0.932691
0.296123	0.803933	0.48119
0.83726	0.623236	0.539946
0.353744	0.810335	0.782099
51.7458	0.801442	0.764486
0.317167	0.567698	1.15214
57.4838	0.780853	1.16605
0.297626	1.15889	0.940339
1.03392	1.56998	0.940962
1.10833	0.600606	0.770161
34.8029	0.430635	1.14221
39.4176	0.505101	1.32364
56.0824	0.495412	0.630572
0.584479	1.86531	0.617907
32.8308	0.46202	0.548217
0.634584	0.726111	1.43288
0.522849	0.841201	0.393956
52.0885	0.597872	0.814487
47.2007	0.942069	1.04653
31.7873	0.715765	0.612855
40.6683	0.685522	1.14951
3.16741	1.38841	1.36291
0.385561	1.12308	0.503613
0.36126	0.722581	1.26156
0.283847	0.792376	0.800162
47.0364	0.596073	1.18934
52.2022	0.460325	0.827221
0.460969	0.708117	1.26201
0.741058	0.518146	1.04622
0.760599	0.578667	1.26633
0.519342	0.71791	1.01245
1.14766	0.908123	1.37405
		1.10785
55.8414	1.30139	0.939404
47.6063	0.804522	0.646316
47.7506	0.893071	0.79594
49.2185	0.92539	0.732513
0.365268	1.37817	1.00584
0.302135	0.940096	0.918469
0.965029	1.35146	1.61088
50.641	1.03276	0.860613
49.592	0.491364
42.9458	1.18277	1.7478
0.296624	2.12435	0.968644
25.5502	0.730125	0.80331
0.407607	1.02356	0.59583
0.763605	1.65005	1.29249
3.10929	1.24647	1.26626
0.977305	0.957813	1.48049
5.40286	0.920304	1.43233
0.84653	0.400946	0.675521
0.44243	1.09502	1.19554
0.333952	1.15176	1.5969
0.528611	0.751302	1.58769
0.449445	0.564584	0.837775
0.625565	0.561781	0.785178
0.267312	0.450117	0.511191
55.0016	0.891029	0.810854
5.76036	2.72087	0.765489
39.6934	0.71836	0.848398
0.536879	1.41752	0.666351
48.1673	1.01643	1.04858
55.53	0.942415	0.74272
26.1104	0.820474	1.2817
0.815214	1.59243	0.838433
0.302887	1.64081	0.46991
0.631327	0.875285	1.11318
0.636087	1.15353	0.729468
0.289609	1.28218	1.13263
1.0487	0.803622	1.30997
1.17071	0.919369	0.801511
0.698719	0.820577	1.18374
1.2108	1.01041	0.692719
1.61014	0.87705	1.00127
36.0077	0.894524	0.758534
50.1592	0.747323	1.07605
56.0939	0.983765	0.949197
49.2222	0.829159	1.04276
47.1511	0.514236	0.770957
30.4653	0.561677	0.746388
1.35485	1.01297	1.01944
0.519091	1.21834	0.623374
3.70228	2.88597	0.888642
0.316165	0.556729	0.756077
0.294619	0.355477	1.59475
0.419131	0.790819	0.869437
0.277834	0.824695	1.21848
46.5221	0.476588	0.600917
0.406855	1.31011	1.05124
0.296624	1.20204	1.06913
0.283847	0.616523	1.45174
0.959517	1.11041	0.832308
0.976052	0.672476	1.43904
0.436167	1.07055	1.1472
0.295872	1.13284	1.0247
0.327438	0.745039	1.11332
0.315914	1.03941	1.5907
0.29487	0.60372	0.700885
43.5866	0.73708	1.16394
48.6067	0.99252	1.20007
0.969789	0.576972	1.77652
0.888618	0.647354	0.906843
5.18841	1.40336	1.39014
5.40987	0.92449	1.38481
37.5655	1.02671	0.93847
0.768115	0.694795	0.672684
0.291613	1.18388	0.844281
0.616296	0.671334	0.37752
0.426146	0.592474	0.360702
0.46122	1.12913	0.716526
49.9951	1.64783	0.861478
55.8735	1.44468	0.90058
0.300883	0.831304	0.854142
57.7825	0.927189	1.35755
1.08503	0.855699	1.47025
0.290611	0.874731	1.26976
1.5009	1.76884	0.870302
45.7131	1.25661	1.02072
47.0356	1.0583	1.09709
1.60688	2.46447	1.41596
51.4016	1.17093	1.99978
6.52647	1.60544	0.993385
2.37449	2.00525	0.926151
44.258	0.680193	0.805387
0.583226	0.841928	0.542369
0.745567	0.839055	0.3888
0.284348	0.597007	0.78722
46.137	1.11716	1.45188
1.22057	0.607699	0.863139
0.627068	0.712028	1.40969
0.387314	1.44406	1.43994
2.34217	0.878226	0.994666
0.687195	0.681819	1.07415
40.5284	0.869091	1.12875
0.60402	1.62223	1.02224
0.32819	1.14688	0.742997
45.0873	0.522368	1.02332
0.923441	0.721405	0.671334
0.496794	0.871409	1.38097
0.648363	1.09948	1.23232
0.344975	0.694657	1.46146
0.969789	1.05128	1.00992
0.305643	1.67026	1.1638
0.393327	1.57589	0.765247
45.5407	1.10366	2.9051
45.4395	0.685729	1.74209
1.12311	0.919923	0.848848
17.7303	1.14754	0.568217
54.5697	0.599948	0.599879
48.4799	0.606765	0.579602
50.9118	0.76234	0.699467
0.652121	0.695764	0.729883
0.961271	0.277551	0.587699
41.4526	0.397935	0.639257
		0.400669
0.62782		0.795767
0.274076		1.46516
38.2835		0.811684
1.01488
21.4907
49.5259
52.9789
1.34533
0.939475
0.594249
43.9061
41.8059
61.9144
3.65995
0.428902
1.07927
0.78465
51.8843
0.730285
1.12111
0.624313
0.774879
2.15779
59.4202
2.54485
3.92876
1.86217
3.27088
30.426
2.14
1.84563
1.9283
34.4983
0.419382
1.61489
0.379548
30.8153
0.282344
1.25915
0.302636
3.73385
0.910915
2.9264
4.11039
40.9218
44.8966
2.7598
2.21491
36.1786
0.451199
1.86392
0.389068
0.286102
0.316165
54.2501
54.3746
2.74527
0.627068
3.72007
0.570199
0.496043
0.649616
27.9916
0.624062
0.386813
4.9251
39.7536
3.86638
53.5478
41.2064
51.5574
4.36593
2.53683
4.20509
41.7167
43.1126
1.82859
3.06419
1.22006
1.85415
1.78826
36.1713
5.50633
39.9325
1.41122
1.56379
0.344975
51.146
57.0637
58.024
2.08639
0.286102
0.293116
0.282594
0.288106
1.73164
2.1891
1.87369
2.22743
35.2777
18.533
34.8377
41.5634
41.6235
0.888368
3.9002
2.14175
4.60618
3.76116
33.3917
2.58794
1.14891
50.8121
0.364266
0.30464
0.632329
48.2336
40.3897
4.81663
0.69947
56.3475
46.8074
62.5635
2.46969
34.3835
1.12111
1.13589
0.301133
2.50026
0.650117
27.247
1.00186
0.810955
45.7118
44.8693
27.8904
2.07586
1.426
0.787906
1.13388
50.8486
0.299379
0.291112
0.540637
40.7021
1.28445
52.104
53.9735
0.636588
8.11481
57.529
60.3621
52.4352
4.44259
63.8046
3.03363
2.39053
23.3782
4.92611
56.7829
0.415874
2.62302
37.6932
47.5059
50.6873
0.858555
1.51168
0.356249
36.4045
47.4833
0.938473
0.360257
8.46505
55.3847
29.0155
1.85415
3.093
0.672664
0.382304
45.8334
1.52846
0.317417
46.4752
48.7319
0.377043
25.6642
2.64682
0.370279
0.555167
2.28956
3.02862
9.42557
52.2381
0.391072
2.10793
52.1153
1.3338
0.916928
0.64686
31.5704
0.682435
37.8426
3.27789
0.624814
0.473746
0.521096
0.755087
62.5149
0.511325
48.3564
3.81227
11.2113
1.21355
56.3039
46.8513
0.345226
0.807949
3.90797
4.32033
39.2094
1.47986
3.29818
0.96578
49.8233
55.3236
42.916
0.787155
10.3245
1.36312
53.9968
0.58022
43.3166
43.5636
0.331697
0.944486
30.3085
51.2768
47.1935
52.0615
2.03653
8.36534
0.48026
0.309901
0.718009
45.7828
0.306895
0.79918
0.376792
57.218
0.287104
0.511575
4.55132
0.519342
46.4083
48.9058
48.5639
23.0577
3.29042
34.1881
0.292866
0.351739
0.58974
1.39268
2.94845
2.24397
20.7195	2.67018
12.613	1.18529
24.2974	1.49939
1.91362	2.57709
17.3824	0.917959
0.560263	1.87476
0.556898	1.07004
0.702246	0.817118
1.31998	1.54005
0.987963	1.16368
0.759578	0.927624
0.699017	0.97467
2.10607	0.945038
1.2831	1.47623
0.557033	0.986341
23.8691	0.958806
4.63418	0.843286
2.42973	1.34603
1.83838	1.03047
24.2831	1.64281
26.7649	2.44169
14.9883	0.818121
0.98083	1.88351
18.4008	1.21255
18.8097	0.854957
11.9138	0.891792
15.2811	0.778642
16.4196	0.955979
1.07033	1.30527
0.539941	0.426521
0.578297	0.921059
0.737372	0.964094
1.16278	0.677255
0.745851	0.943397
1.56141	0.991447
1.53221	1.33919
4.21684	1.25476
22.6892	1.03239
23.8164	0.826145
0.550842	0.893433
1.47636	1.19869
26.4358	2.33948
18.4389	0.880121
1.07006	1.34302
1.6209	1.37448
1.26009	1.15939
0.831983	1.03248
1.03668	1.35752
1.89316	1.06357
27.5223	2.06741
24.7182	2.27694
22.1239	0.765604
1.90123	1.22814
0.864955	1.11782
1.31876	1.4786
0.962123	1.05016
0.581123	1.18483
0.604675	1.41706
2.04322	1.44076
0.600772	1.26634
1.06158	1.51461
1.54136	0.822498
0.564839	0.663396
1.20518	0.755757
19.1857	0.975582
19.3231	1.38505
6.21013	0.70716
16.6461	2.19387
1.30504	0.834989
19.635	1.50176
17.0439	0.818851
17.9718	0.862706
20.0937	0.572494
18.5954	0.897171
0.743159	0.795327
0.59189	0.73041
0.713417	0.861156
1.19145	0.905741
23.5387	1.67472
2.00997	0.900089
1.11137	0.730684
0.981772	0.892156
1.34205	0.72886
0.854727	1.01698
27.7196	0.845383
15.0708	0.871733
1.13129	0.676069
11.5044	0.936741
1.06602	1.05089
2.1848	1.12365
1.33115	1.16495
1.07867	0.785116
21.1948	1.6698
25.0265	1.9456
10.2053	0.740804
7.29553	0.744451
0.877741	1.0374
0.799414	1.16532
0.921749	1.53321
0.837635	1.06539
18.6204	1.42389
0.560801	1.50103
15.5444	0.764328
1.29656	1.11089
0.884873	0.947226
1.06346	0.798701
0.724587	1.14289
0.547074	0.836448
3.73612	1.2378
15.2139	0.891518
2.0743	1.40001
16.7347	0.523259
2.04631	1.44331
24.7291	1.53814
11.7651	1.67937
2.83213	1.11463
0.578835	0.883768
1.59021	1.19422
0.763481	0.922427
14.8601	1.12602
17.8948	1.08727
0.609116	0.902824
0.596869	0.642881
0.709918	0.592643
13.3123	0.702966
0.845576	0.49545
21.0545	1.23917
0.556495	0.575411
23.8176	0.991173
1.27597	0.526267
12.2857	0.811921
3.70839	0.491438
1.63005	0.811192
16.0005	0.839092
0.622843	0.790678
2.72999	0.520888
0.75729	0.852039
6.65748	0.618629
1.07477	0.633855
0.677887	0.561279
0.750157	0.669778
0.85069	0.917686
0.578566	0.647987
1.46559	0.768887
0.629438	0.492988
1.37731	0.531647
15.5318	0.881215
1.05929	0.562555

## Sheet: C
ZsGreen	HA Hela all pos	HA Hela all neg	HA Hela1 pos	HA Hela1 neg	HA Hela2 pos	HA Hela2 neg	ZsGreen
52.074	2.544		2.544				52.074
9.362	1.567		1.567				9.362
27.925	1.683		1.683				27.925
36.986	2.106		2.106				36.986
0.87		1.036		1.036			0.87
0.863		1.079		1.079			0.863
1.09		1.569		1.569			1.09
34.437	1.656		1.656				34.437
21.823	1.305		1.305				21.823
0.829		0.851		0.851			0.829
0.914		1.134		1.134			0.914
0.804		0.746		0.746			0.804
36.736	2.889		2.889				36.736
30.137	1.178		1.178				30.137
57.805	1.321		1.321				57.805
0.969		0.897		0.897			0.969
0.951		1.117		1.117			0.951
21.001	1.114		1.114				21.001
9.276	1.228		1.228				9.276
8.259	1.05		1.05				8.259
0.83		0.609		0.609			0.83
0.809		0.753		0.753			0.809
1.382		1.365		1.365			1.382
0.93		1.191		1.191			0.93
0.803		0.935		0.935			0.803
0.765		0.662		0.662			0.765
0.716		0.431		0.431			0.716
0.795		0.732		0.732			0.795
0.808		0.755		0.755			0.808
0.858		0.74		0.74			0.858
0.769		0.569		0.569			0.769
0.911		1.108		1.108			0.911
6.601	1.197		1.197				6.601
0.732		0.47		0.47			0.732
7.842	1.247		1.247				7.842
0.888		1.013		1.013			0.888
1.026		1.281		1.281			1.026
1.05		1.172		1.172			1.05
0.911		0.97		0.97			0.911
0.768		0.425		0.425			0.768
0.765		0.464		0.464			0.765
0.795		0.623		0.623			0.795
0.844		0.857		0.857			0.844
0.749		0.582		0.582			0.749
7.988	0.812		0.812				7.988
0.763		0.521		0.521			0.763
5.427	0.933		0.933				5.427
1.075		0.928		0.928			1.075
0.891		0.95		0.95			0.891
0.798		0.722		0.722			0.798
0.811		0.781		0.781			0.811
0.836		0.754		0.754			0.836
0.967		1.104		1.104			0.967
0.803		0.812		0.812			0.803
6.046	0.936		0.936				6.046
45.944	1.485		1.485				45.944
31.721	1.384		1.384				31.721
0.804		0.909		0.909			0.804
0.804		0.725		0.725			0.804
18.362	0.943		0.943				18.362
14.233	1.229		1.229				14.233
27.642	1.944		1.944				27.642
25.253	1.324		1.324				25.253
23.077	1.271		1.271				23.077
0.839		0.914		0.914			0.839
0.96		1.063		1.063			0.96
0.913		0.876		0.876			0.913
0.799		0.839		0.839			0.799
0.902		1.219		1.219			0.902
0.795		0.879		0.879			0.795
0.887		1.303		1.303			0.887
0.83		0.874		0.874			0.83
0.884		0.828		0.828			0.884
1.417		1.451		1.451			1.417
0.751		0.566		0.566			0.751
0.844		0.974		0.974			0.844
1.843		0.844		0.844			1.843
0.787		0.491		0.491			0.787
0.981		1.188		1.188			0.981
43.872	0.939		0.939				43.872
0.836		0.714		0.714			0.836
0.86		0.878		0.878			0.86
0.862		0.829		0.829			0.862
23.667	1.796		1.796				23.667
26.726	1.83		1.83				26.726
28.337	0.875		0.875				28.337
33.984	0.982		0.982				33.984
18.594	0.848		0.848				18.594
20.075	0.913		0.913				20.075
16.219	1.14		1.14				16.219
12.433	1.049		1.049				12.433
48.996	2.452		2.452				48.996
35.684	1.328		1.328				35.684
24.023	0.946		0.946				24.023
0.939		0.668		0.668			0.939
6.247	1.118		1.118				6.247
0.782		0.553		0.553			0.782
0.923		0.548		0.548			0.923
0.778		0.561		0.561			0.778
8.597	2.036		2.036				8.597
5.461	1.66		1.66				5.461
10.693	1.694		1.694				10.693
4.96	0.906		0.906				4.96
6.28	0.556		0.556				6.28
0.791		0.667		0.667			0.791
0.767		0.554		0.554			0.767
0.874		0.722		0.722			0.874
0.761		0.458		0.458			0.761
1.037		0.955		0.955			1.037
1.193		0.902		0.902			1.193
0.791		0.614		0.614			0.791
0.824		0.838		0.838			0.824
8.355	0.751		0.751				8.355
0.76		0.871		0.871			0.76
18.127	1.189		1.189				18.127
5.881	0.801		0.801				5.881
0.791		0.637		0.637			0.791
1.098		1.452		1.452			1.098
1.442		0.981		0.981			1.442
41.868	1.221		1.221				41.868
48.709	1.09		1.09				48.709
0.956		0.965		0.965			0.956
0.755		0.615		0.615			0.755
0.898		1.236		1.236			0.898
27.133	0.827		0.827				27.133
51.463	1.076		1.076				51.463
48.674	1.717		1.717				48.674
34.496	2.331		2.331				34.496
15.207	1.598		1.598				15.207
49.904	1.599		1.599				49.904
57.086	3.03		3.03				57.086
53.323	3.2		3.2				53.323
52.965	1.664		1.664				52.965
48.732	1.168		1.168				48.732
0.862		0.903		0.903			0.862
1.25		1.226		1.226			1.25
0.93		1.244		1.244			0.93
0.935		0.939		0.939			0.935
0.829		0.867		0.867			0.829
1.103		1.372		1.372			1.103
1.071		1.288		1.288			1.071
1.074		1.179		1.179			1.074
10.139	0.773		0.773				10.139
0.74		0.637		0.637			0.74
0.769		0.518		0.518			0.769
0.847		0.896		0.896			0.847
0.857		0.846		0.846			0.857
0.982		1.455		1.455			0.982
0.861		1.069		1.069			0.861
0.815		0.627		0.627			0.815
1.026		0.638		0.638			1.026
0.839		0.957		0.957			0.839
0.869		1.079		1.079			0.869
3.941	1.635		1.635				3.941
29.422	2.085		2.085				29.422
58.915	1.252		1.252				58.915
19.044	1.796		1.796				19.044
3.301		1.445		1.445			3.301
5.74	0.575		0.575				5.74
0.847		1.166		1.166			0.847
20.921	1.728		1.728				20.921
0.801		0.629		0.629			0.801
0.761		0.352		0.352			0.761
0.814		0.66		0.66			0.814
52.995	1.289		1.289				52.995
58.921	2.058		2.058				58.921
8.012	0.978		0.978				8.012
8.105	0.871		0.871				8.105
0.96		1.417		1.417			0.96
0.961		1.315		1.315			0.961
0.805		0.906		0.906			0.805
1.111		1.429		1.429			1.111
1.015		1.357		1.357			1.015
0.955		1.286		1.286			0.955
0.859		1.185		1.185			0.859
29.252	1.091		1.091				29.252
3.333		0.818		0.818			3.333
48.972	0.922		0.922				48.972
28.933	0.582		0.582				28.933
0.834		0.697		0.697			0.834
0.835		0.823		0.823			0.835
0.935		0.808		0.808			0.935
4.886	1.186		1.186				4.886
0.798		0.6		0.6			0.798
0.857		0.955		0.955			0.857
0.828		0.8		0.8			0.828
1.023		0.492		0.492			1.023
0.933		1.181		1.181			0.933
0.823		0.811		0.811			0.823
1.225		1.875		1.875			1.225
58.891	1.479		1.479				58.891
58.921	1.624		1.624				58.921
35.725	1.505		1.505				35.725
39.879	1.698		1.698				39.879
0.996		0.911		0.911			0.996
2.107		0.671		0.671			2.107
0.891		0.964		0.964			0.891
1.028		1.194		1.194			1.028
3.144		1.154		1.154			3.144
23.414	1.453		1.453				23.414
31.365	1.952		1.952				31.365
23.908	1.394		1.394				23.908
17.889	1.537		1.537				17.889
24.03	1.741		1.741				24.03
1.274		0.866		0.866			1.274
0.795		0.836		0.836			0.795
0.811		0.679		0.679			0.811
0.845		0.821		0.821			0.845
0.976		0.926		0.926			0.976
0.941		1.098		1.098			0.941
1.139		1.095		1.095			1.139
2.603		1.112		1.112			2.603
0.79		0.793		0.793			0.79
0.816		0.798		0.798			0.816
0.967		1.336		1.336			0.967
0.834		1.01		1.01			0.834
16.089	0.852		0.852				16.089
1.668		0.839		0.839			1.668
0.849		0.848		0.848			0.849
1.035		1.316		1.316			1.035
0.852		0.819		0.819			0.852
31.387	1.245		1.245				31.387
35.719	1.188		1.188				35.719
37.963	0.868		0.868				37.963
28.152	1.136		1.136				28.152
16.934	0.909		0.909				16.934
23.342	1.49		1.49				23.342
27.919	1.885		1.885				27.919
23.961	1.189		1.189				23.961
37.179	1.869		1.869				37.179
24.209	1.434		1.434				24.209
0.735		0.507		0.507			0.735
0.839		0.889		0.889			0.839
0.79		0.753		0.753			0.79
0.901		1.265		1.265			0.901
5.045	1.701		1.701				5.045
0.869		0.919		0.919			0.869
0.892		0.951		0.951			0.892
1.066		1.199		1.199			1.066
2.471		0.888		0.888			2.471
1.209		0.973		0.973			1.209
0.857		0.896		0.896			0.857
0.971		1.49		1.49			0.971
0.952		1.299		1.299			0.952
0.905		1.128		1.128			0.905
11.902	1.793		1.793				11.902
36.748	1.205		1.205				36.748
1.065		1.16		1.16			1.065
0.855		0.753		0.753			0.855
0.916		0.998		0.998			0.916
40.976	1.049		1.049				40.976
44.947	1.299		1.299				44.947
22.828	1.881		1.881				22.828
0.903		1.078		1.078			0.903
0.813		0.865		0.865			0.813
23.068	2.145		2.145				23.068
24.376	1.903		1.903				24.376
0.866		0.788		0.788			0.866
0.859		0.901		0.901			0.859
0.853		0.86		0.86			0.853
0.767		0.699		0.699			0.767
0.797		0.712		0.712			0.797
0.895		1.042		1.042			0.895
17.935	1.151		1.151				17.935
20.098	1.342		1.342				20.098
17.413	1.415		1.415				17.413
1.136		0.955		0.955			1.136
27.165	1.88		1.88				27.165
27.045	1.849		1.849				27.045
14.048	1.165		1.165				14.048
0.788		0.705		0.705			0.788
51.091	1.812		1.812				51.091
55.243	1.448		1.448				55.243
57.149	2.159		2.159				57.149
52.832	4.349		4.349				52.832
0.765		0.474		0.474			0.765
1.499		0.978		0.978			1.499
0.809		0.795		0.795			0.809
15.315	1.156		1.156				15.315
21.993	0.951		0.951				21.993
0.909		0.849		0.849			0.909
0.901		1.032		1.032			0.901
0.858		0.925		0.925			0.858
0.835		0.797		0.797			0.835
14.085	1.315		1.315				14.085
10.161	1.271		1.271				10.161
2.892		0.66		0.66			2.892
1.078		0.873		0.873			1.078
0.845		0.998		0.998			0.845
0.827		0.871		0.871			0.827
24.703	1.365		1.365				24.703
55.145	1.819		1.819				55.145
58.18	3.068		3.068				58.18
58.917	1.938		1.938				58.917
0.868		1.262		1.262			0.868
0.99		1.913		1.913			0.99
1.267		1.475		1.475			1.267
14.868	1.738		1.738				14.868
12.678	1.778		1.778				12.678
24.484	1.424		1.424				24.484
15.556	1.732		1.732				15.556
0.83		1.117		1.117			0.83
0.875		1.237		1.237			0.875
11.133	1.628		1.628				11.133
11.383	1.891		1.891				11.383
2.101		1.392		1.392			2.101
1.627		1.538		1.538			1.627
5.068	1.018		1.018				5.068
33.697	1.756		1.756				33.697
30.066	1.939		1.939				30.066
0.976		1.25		1.25			0.976
0.948		1.549		1.549			0.948
0.873		1.309		1.309			0.873
0.921		1.489		1.489			0.921
0.766		0.808		0.808			0.766
2.129		1.13		1.13			2.129
0.946		1.025		1.025			0.946
1.498		1.158		1.158			1.498
29.58	1.327		1.327				29.58
34.907	1.473		1.473				34.907
30.482	2.149		2.149				30.482
12.199	1.404		1.404				12.199
12.182	1.161		1.161				12.182
1.011		1.35		1.35			1.011
6.425	2.253		2.253				6.425
0.939		1.329		1.329			0.939
1.089		1.783		1.783			1.089
0.906		0.998		0.998			0.906
10.413	0.878		0.878				10.413
24.857	3.346		3.346				24.857
0.791		1.02		1.02			0.791
1.256		1.525		1.525			1.256
9.685	0.937		0.937				9.685
0.87		1.249		1.249			0.87
52.317	2.235		2.235				52.317
0.823		0.88		0.88			0.823
58.875	1.623		1.623				58.875
58.912	1.898		1.898				58.912
3.559	1.734		1.734				3.559
1.246		1.618		1.618			1.246
0.817		1.15		1.15			0.817
6.503	1.961		1.961				6.503
11.996	2.643		2.643				11.996
0.878		1.048		1.048			0.878
0.846		0.977		0.977			0.846
35.214	2.863		2.863				35.214
1.148		1.131		1.131			1.148
1.768		1.372		1.372			1.768
0.776		0.762		0.762			0.776
22.749	1.195		1.195				22.749
3.804	1.072		1.072				3.804
0.859		1.201		1.201			0.859
0.709		0.781		0.781			0.709
0.772		1.03		1.03			0.772
3.92	1.46		1.46				3.92
0.857		1.106		1.106			0.857
0.767		0.928		0.928			0.767
0.84		1.553		1.553			0.84
0.803		1.367		1.367			0.803
2.651		1.115		1.115			2.651
1.086		1.912		1.912			1.086
0.764		1.092		1.092			0.764
2.557		1.634		1.634			2.557
0.764		0.878		0.878			0.764
26.945	2.325		2.325				26.945
33.632	2.414		2.414				33.632
19.819	2.063		2.063				19.819
11.942	2.451		2.451				11.942
58.919	1.254		1.254				58.919
2.883		1.917		1.917			2.883
0.809		1.228		1.228			0.809
6.649	1.176		1.176				6.649
0.758		0.998		0.998			0.758
4.606	1.334		1.334				4.606
7.022	1.532		1.532				7.022
0.789		1.259		1.259			0.789
0.763		1.085		1.085			0.763
0.739		0.887		0.887			0.739
0.888		1.584		1.584			0.888
0.842		1.192		1.192			0.842
20.597	1.015		1.015				20.597
58.559	3.229		3.229				58.559
20.107	1.143		1.143				20.107
17.713	1.985		1.985				17.713
0.841		1.32		1.32			0.841
0.781		1.148		1.148			0.781
30.38	1.484		1.484				30.38
10.755	1.692		1.692				10.755
0.912		1.854		1.854			0.912
0.796		1.307		1.307			0.796
0.76		1.115		1.115			0.76
0.823		1.339		1.339			0.823
0.739		1.114		1.114			0.739
24.777	1.909		1.909				24.777
39.414	1.857		1.857				39.414
13.516	1.703		1.703				13.516
44.869	2.426		2.426				44.869
24.927	1.753		1.753				24.927
27.761	1.898		1.898				27.761
0.738		1.164		1.164			0.738
0.82		1.055		1.055			0.82
0.837		1.396		1.396			0.837
0.758		0.902		0.902			0.758
45.601	1.774		1.774				45.601
41.28	1.651		1.651				41.28
33.037	1.659		1.659				33.037
0.795		1.062		1.062			0.795
2.006		3.256				3.256	2.006
5.676	0.336				0.336		5.676
1.253		0.391				0.391	1.253
1.965		0.32				0.32	1.965
0.685		1.077				1.077	0.685
3.809	0.416				0.416		3.809
3.34	0.239				0.239		3.34
1.031		0.443				0.443	1.031
1.09		0.503				0.503	1.09
0.826		1.168				1.168	0.826
2.145	1.844				1.844		2.145
1.745		2.912				2.912	1.745
1.534		0.993				0.993	1.534
1.243		1.56				1.56	1.243
1.652		1.374				1.374	1.652
0.524		0.857				0.857	0.524
1.319		0.337				0.337	1.319
1.622		0.649				0.649	1.622
1.294		0.882				0.882	1.294
1.378		1.041				1.041	1.378
2.102	2.507				2.507		2.102
1.178		0.347				0.347	1.178
1.396		0.262				0.262	1.396
1.654		1.193				1.193	1.654
0.757		0.816				0.816	0.757
0.729		0.776				0.776	0.729
1.087		0.359				0.359	1.087
0.984		0.312				0.312	0.984
2.114	1.113				1.113		2.114
1.398		0.47				0.47	1.398
1.275		2.365				2.365	1.275
1.067		0.394				0.394	1.067
1.977		0.437				0.437	1.977
0.916		0.297				0.297	0.916
0.528		0.88				0.88	0.528
0.71		1.423				1.423	0.71
1.102		2.36				2.36	1.102
2.214	0.925				0.925		2.214
1.612		3.557				3.557	1.612
1.36		1.822				1.822	1.36
1.117		0.634				0.634	1.117
1.971		0.446				0.446	1.971
1.375		0.383				0.383	1.375
2.027		0.393				0.393	2.027
1.938		0.542				0.542	1.938
1.384		0.374				0.374	1.384
0.651		1.154				1.154	0.651
1.067		0.594				0.594	1.067
0.872		0.396				0.396	0.872
1.344		0.49				0.49	1.344
0.577		0.965				0.965	0.577
0.784		0.52				0.52	0.784
2.654	0.376				0.376		2.654
1.355		3.297				3.297	1.355
0.695		0.703				0.703	0.695
1.263		0.782				0.782	1.263
0.888		0.42				0.42	0.888
0.919		0.541				0.541	0.919
2.079	0.938				0.938		2.079
2.66	0.457				0.457		2.66
1.089		0.786				0.786	1.089
0.723		1.178				1.178	0.723
1.636		0.589				0.589	1.636
3.197	1.367				1.367		3.197
2.051		0.461				0.461	2.051
1.513		0.455				0.455	1.513
2.047		2.465				2.465	2.047
1.441		0.346				0.346	1.441
1.845		3.567				3.567	1.845
0.883		0.855				0.855	0.883
1.074		0.793				0.793	1.074
0.825		0.859				0.859	0.825
0.983		0.976				0.976	0.983
0.548		1.042				1.042	0.548
0.468		0.72				0.72	0.468
0.675		1.176				1.176	0.675
1.46		0.57				0.57	1.46
1.1		0.968				0.968	1.1
0.785		0.354				0.354	0.785
0.71		0.794				0.794	0.71
0.764		0.544				0.544	0.764
0.63		0.837				0.837	0.63
0.651		0.77				0.77	0.651
1.89		2.717				2.717	1.89
0.655		0.676				0.676	0.655
1.532		2.102				2.102	1.532
0.713		0.696				0.696	0.713
0.677		0.425				0.425	0.677
0.529		0.397				0.397	0.529
0.751		0.504				0.504	0.751
0.567		0.704				0.704	0.567
0.694		0.39				0.39	0.694
0.731		1.652				1.652	0.731
1.46		0.694				0.694	1.46
0.486		0.899				0.899	0.486
0.603		0.769				0.769	0.603
5.389	0.549				0.549		5.389
2.12	0.829				0.829		2.12
1.901		2.411				2.411	1.901
1.595		2.297				2.297	1.595
1.684		3.104				3.104	1.684
0.718		1.365				1.365	0.718
3.059	0.529				0.529		3.059
1.144		0.751				0.751	1.144
1.76		0.489				0.489	1.76
5.331	0.869				0.869		5.331
1.77		0.397				0.397	1.77
2.983	0.965				0.965		2.983
4.332	0.628				0.628		4.332
2.123	1.071				1.071		2.123
0.48		0.491				0.491	0.48
1.39		1.664				1.664	1.39
1.624		0.452				0.452	1.624
1.255		0.479				0.479	1.255
2.341	3.886				3.886		2.341
2.749	3.024				3.024		2.749
1.973		0.533				0.533	1.973
1.057		2.142				2.142	1.057
1.851		2.548				2.548	1.851
0.744		1.507				1.507	0.744
6.781	1.956				1.956		6.781
1.847		0.733				0.733	1.847
2.419	2.698				2.698		2.419
1.272		1.355				1.355	1.272
0.997		0.601				0.601	0.997
1.029		0.591				0.591	1.029
0.819		0.215				0.215	0.819
2.693	1.854				1.854		2.693
1.292		1.436				1.436	1.292
3.753	0.707				0.707		3.753
4.232	1.094				1.094		4.232
2.094	2.093				2.093		2.094
2.373	2.446				2.446		2.373
0.607		0.758				0.758	0.607
1.308		0.586				0.586	1.308
8.729	0.841				0.841		8.729
2.081	1.403				1.403		2.081
2.232	4.02				4.02		2.232
0.687		1.663				1.663	0.687
0.444		0.845				0.845	0.444
0.966		1.295				1.295	0.966
1.33		0.94				0.94	1.33
2.61	0.997				0.997		2.61
2.645	1.457				1.457		2.645
1.585		0.619				0.619	1.585
1.553		1.731				1.731	1.553
0.968		0.905				0.905	0.968
0.808		2.398				2.398	0.808
1.642		2.838				2.838	1.642
5.724	0.844				0.844		5.724
0.755		0.7				0.7	0.755
0.806		0.53				0.53	0.806
0.586		1.383				1.383	0.586
0.787		1.801				1.801	0.787
2.253	1.02				1.02		2.253
1.459		2.306				2.306	1.459
1.048		0.437				0.437	1.048
6.868	0.756				0.756		6.868
2.003		4.249				4.249	2.003
4.457	1.104				1.104		4.457
0.858		0.463				0.463	0.858
0.575		0.354				0.354	0.575
2.841	3.555				3.555		2.841
2.238	0.88				0.88		2.238
0.68		0.398				0.398	0.68
0.698		0.463				0.463	0.698
3.062	0.787				0.787		3.062
2.534	0.622				0.622		2.534
1.04		0.393				0.393	1.04
1.986		0.641				0.641	1.986
1.202		0.292				0.292	1.202
0.887		1.814				1.814	0.887
0.914		0.435				0.435	0.914
0.705		0.748				0.748	0.705
1.027		0.332				0.332	1.027
0.517		1.496				1.496	0.517
0.939		1.828				1.828	0.939
0.888		1.583				1.583	0.888
0.47		0.975				0.975	0.47
0.62		1.008				1.008	0.62
1.107		0.937				0.937	1.107
0.837		0.728				0.728	0.837
0.445		0.805				0.805	0.445
0.767		0.67				0.67	0.767
0.845		0.725				0.725	0.845
0.658		1.373				1.373	0.658
0.641		1.276				1.276	0.641
0.793		0.466				0.466	0.793
0.861		0.641				0.641	0.861
0.944		0.43				0.43	0.944
1.081		0.649				0.649	1.081
0.439		0.75				0.75	0.439
1.542		0.431				0.431	1.542
0.555		1.222				1.222	0.555
0.627		0.998				0.998	0.627
0.892		0.673				0.673	0.892
0.798		0.991				0.991	0.798
0.961		0.569				0.569	0.961
0.824		0.568				0.568	0.824
1.921		0.413				0.413	1.921
1.46		0.582				0.582	1.46
0.873		0.696				0.696	0.873
0.857		0.681				0.681	0.857
0.782		1.085				1.085	0.782
0.67		1.781				1.781	0.67
0.401		0.265				0.265	0.401
0.729		0.27				0.27	0.729
0.563		0.449				0.449	0.563
0.764		0.563				0.563	0.764
1.567		0.424				0.424	1.567
0.671		2.313				2.313	0.671
0.51		1.325				1.325	0.51
1.046		2.409				2.409	1.046
0.465		0.455				0.455	0.465
0.877		0.743				0.743	0.877
1.932		3.147				3.147	1.932
1.364		0.739				0.739	1.364
0.801		0.275				0.275	0.801
1.599		0.509				0.509	1.599
1.598		0.408				0.408	1.598
0.931		1.952				1.952	0.931
1.168		0.422				0.422	1.168
0.921		0.314				0.314	0.921
0.561		1.146				1.146	0.561
0.526		0.989				0.989	0.526
1.051		2.269				2.269	1.051
1.162		2.38				2.38	1.162
0.802		0.928				0.928	0.802
0.648		0.283				0.283	0.648
1.234		0.456				0.456	1.234
0.894		0.29				0.29	0.894
0.581		0.594				0.594	0.581
0.534		0.475				0.475	0.534
1.494		0.552				0.552	1.494
0.647		0.895				0.895	0.647
0.814		0.365				0.365	0.814
0.475		0.513				0.513	0.475
0.502		0.859				0.859	0.502
0.495		0.776				0.776	0.495
1.729		2.405				2.405	1.729
1.201		1.932				1.932	1.201
0.816		0.963				0.963	0.816
0.678		0.353				0.353	0.678
0.783		0.397				0.397	0.783
0.725		0.273				0.273	0.725
0.647		0.486				0.486	0.647
0.562		0.399				0.399	0.562
0.647		0.572				0.572	0.647
0.597		0.327				0.327	0.597
1.096		0.482				0.482	1.096
0.792		0.683				0.683	0.792
0.634		1.703				1.703	0.634
0.536		1.361				1.361	0.536
0.573		1.281				1.281	0.573
1.343		2.943				2.943	1.343
1.318		0.974				0.974	1.318
0.725		2.179				2.179	0.725
0.686		1.516				1.516	0.686
0.633		0.531				0.531	0.633
1.029		0.392				0.392	1.029
0.55		0.613				0.613	0.55
0.955		2.462				2.462	0.955
0.666		0.36				0.36	0.666
1.426		0.566				0.566	1.426
0.922		0.703				0.703	0.922
0.74		1.911				1.911	0.74
0.949		1.081				1.081	0.949
0.968		0.442				0.442	0.968
1.383		0.48				0.48	1.383
0.75		0.487				0.487	0.75
0.74		0.366				0.366	0.74
0.513		0.371				0.371	0.513
0.553		0.491				0.491	0.553
0.862		0.806				0.806	0.862
0.91		0.704				0.704	0.91
0.61		0.545				0.545	0.61
0.512		0.657				0.657	0.512
0.766		0.586				0.586	0.766
0.542		0.484				0.484	0.542
0.612		0.452				0.452	0.612
0.442		0.287				0.287	0.442
0.696		0.365				0.365	0.696
0.782		0.374				0.374	0.782
0.429		0.673				0.673	0.429
1.5		0.33				0.33	1.5
0.776		0.953				0.953	0.776
1.155		0.549				0.549	1.155
0.63		0.787				0.787	0.63
0.688		0.902				0.902	0.688
0.529		0.6				0.6	0.529
0.501		0.745				0.745	0.501
0.92		0.585				0.585	0.92
0.954		0.413				0.413	0.954
0.721		0.474				0.474	0.721
0.409		0.266				0.266	0.409
0.597		0.376				0.376	0.597
13.801	0.696				0.696		13.801
1.831		0.351				0.351	1.831
1.978		0.78				0.78	1.978
0.94		0.803				0.803	0.94
2.452	0.973				0.973		2.452
1.663		4.468				4.468	1.663
2.764	2.262				2.262		2.764
0.753		0.941				0.941	0.753
0.437		0.861				0.861	0.437
0.936		1.916				1.916	0.936
2.445	0.32				0.32		2.445
0.558		1.083				1.083	0.558
0.888		1.744				1.744	0.888
0.679		1.736				1.736	0.679
0.663		1.405				1.405	0.663
0.455		0.708				0.708	0.455
0.645		1.229				1.229	0.645
0.919		1.44				1.44	0.919
1.789		3.621				3.621	1.789
1.13		2.888				2.888	1.13
1.637		3.029				3.029	1.637
0.606		1.443				1.443	0.606
1.287		2.251				2.251	1.287
0.727		2.747				2.747	0.727
0.569		1.017				1.017	0.569
1.248		2.987				2.987	1.248
0.712		0.877				0.877	0.712
1.023		0.714				0.714	1.023
1.153		0.306				0.306	1.153
1.747		1.531				1.531	1.747
1.717		0.508				0.508	1.717
1.341		0.946				0.946	1.341
0.376		0.653				0.653	0.376
1.639		3.257				3.257	1.639
1.267		2.092				2.092	1.267
0.909		1.582				1.582	0.909
3.218	0.52				0.52		3.218
0.521		0.811				0.811	0.521
1.583		0.912				0.912	1.583
1.49		0.742				0.742	1.49
2.418	0.885				0.885		2.418
3.067	0.623				0.623		3.067
1.782		0.717				0.717	1.782
0.746		0.946				0.946	0.746
0.993		0.842				0.842	0.993
1.407		1.18				1.18	1.407
1.821		0.51				0.51	1.821
4.301	0.585				0.585		4.301
0.717		1.228				1.228	0.717
0.496		0.686				0.686	0.496
0.671		1.09				1.09	0.671
2.113	2.958				2.958		2.113
1.845		2.273				2.273	1.845
1.221		3.531				3.531	1.221
1.729		2.957				2.957	1.729
1.605		3.749				3.749	1.605
1.967		0.481				0.481	1.967
0.513		0.744				0.744	0.513
1.263		3.47				3.47	1.263
1.894		0.552				0.552	1.894
0.995		0.691				0.691	0.995
1.491		2.64				2.64	1.491
0.741		1.359				1.359	0.741
0.718		0.422				0.422	0.718
1.163		2.063				2.063	1.163
3.399	0.801				0.801		3.399
1.023		0.364				0.364	1.023
0.802		1.358				1.358	0.802
1.037		1.368				1.368	1.037
0.715		1.159				1.159	0.715
0.771		1.186				1.186	0.771
1.135		2.258				2.258	1.135
1.112		0.356				0.356	1.112
1.121		0.326				0.326	1.121
0.804		0.789				0.789	0.804
0.957		0.743				0.743	0.957
0.496		0.856				0.856	0.496
0.824		0.932				0.932	0.824
0.751		0.555				0.555	0.751
1.284		3.005				3.005	1.284
0.633		1.013				1.013	0.633
0.642		1.052				1.052	0.642
0.52		0.888				0.888	0.52
1.438		0.368				0.368	1.438
2.403	0.717				0.717		2.403
2.594	0.727				0.727		2.594
2.451	1.07				1.07		2.451
1.282		1.149				1.149	1.282
1.003		1.614				1.614	1.003
0.521		0.801				0.801	0.521
0.504		0.419				0.419	0.504
1.152		1.78				1.78	1.152
0.636		0.79				0.79	0.636
0.553		0.999				0.999	0.553
0.6		0.265				0.265	0.6
1.25		0.391				0.391	1.25
0.484		0.837				0.837	0.484
0.616		1.445				1.445	0.616
4.894	0.965				0.965		4.894
1.408		2.436				2.436	1.408
0.599		0.437				0.437	0.599
1.403		0.432				0.432	1.403
5.324	0.527				0.527		5.324
2.833	0.504				0.504		2.833
6.456	0.658				0.658		6.456
0.82		0.409				0.409	0.82
0.79		0.396				0.396	0.79
1.318		0.609				0.609	1.318
2.805	0.608				0.608		2.805
0.53		0.96				0.96	0.53
0.849		0.772				0.772	0.849
1.397		0.47				0.47	1.397
0.888		0.626				0.626	0.888
1.187		0.929				0.929	1.187
0.758		1.741				1.741	0.758
1.48		0.436				0.436	1.48
0.591		1.142				1.142	0.591
1.132		0.335				0.335	1.132
1.104		0.37				0.37	1.104
1.276		0.447				0.447	1.276
1.626		0.375				0.375	1.626
0.943		1.297				1.297	0.943
0.614		0.344				0.344	0.614
0.807		0.443				0.443	0.807
0.796		0.615				0.615	0.796
0.554		0.685				0.685	0.554
1.044		1.958				1.958	1.044
1.088		0.429				0.429	1.088
0.611		1.154				1.154	0.611
0.651		0.911				0.911	0.651
0.742		0.757				0.757	0.742
0.801		0.548				0.548	0.801
1.345		1.307				1.307	1.345
0.855		0.505				0.505	0.855
1.486		0.471				0.471	1.486
1.795		0.411				0.411	1.795
1.271		0.494				0.494	1.271
2.477	1.106				1.106		2.477
0.637		0.661				0.661	0.637
0.893		0.247				0.247	0.893
1.569		0.269				0.269	1.569
0.665		1.04				1.04	0.665
0.557		0.718				0.718	0.557
0.419		0.507				0.507	0.419
0.436		0.577				0.577	0.436
1.064		1.043				1.043	1.064
0.98		0.551				0.551	0.98
1.657		0.422				0.422	1.657
1.688		0.596				0.596	1.688
0.756		0.386				0.386	0.756
1.065		1.138				1.138	1.065
0.656		0.299				0.299	0.656
0.903		1.686				1.686	0.903
0.686		1.262				1.262	0.686
0.807		0.478				0.478	0.807
0.809		0.56				0.56	0.809
0.554		0.886				0.886	0.554
0.697		0.273				0.273	0.697
0.568		0.589				0.589	0.568
0.628		0.451				0.451	0.628
0.619		0.617				0.617	0.619
0.919		0.431				0.431	0.919
1.667		0.444				0.444	1.667
0.517		0.381				0.381	0.517
