# Supplementary material for: The switch-like expression of heme-regulated kinase 1 mediates neuronal proteostasis following proteasome inhibition
Source: eLife. 2020 Apr 24;9:e52714. doi: 10.7554/eLife.52714 (PMC7224698; doi:10.7554/eLife.52714)
Supplement: Figure 4—source data 1. [file elife-52714-fig4-data1.xlsx]

## Sheet: 4A
	ddPCR
		Ribosomic	eif2ak1	Dilution	Normalization
	Experiment 1
	Control	11680	160	3200	0.273973
	PI	21340	175	3500	0.164011
	Experiment 2
	Control	10720	147	2940	0.274254
	PI	15300	205	4100	0.267974
	Experiment 3
	PI	954	249		0.261006
	PI	751	233		0.310253
	All Experiments
	mRNA
		Average	Devest
	Control	1	0.000725204
	PI	1.04201	0.127038
		t-test
		P value	0.6417
		P value summary	ns

## Sheet: 4B
Immunoprecipitated HRI
		Experiment 1	Experiment 2	Experiment 3	Experiment 4
	Control	18865368	4306305	6253169	2726694
	2h PI	25239874	5.46473e+06	9.13152e+06	4009740
	Relative Values	Experiment 1	Experiment 2	Experiment 3	Experiment 4
	Control	1	1	1	1
	2h PI	1.33789	1.26901	1.4603	1.47055
	t-test
	P value Control vs PI	0.0002
	P value summary	***

## Sheet: 4D
Immunoprecipitated HRI
Experiment 1	Arbitrary Units	Experiment 2	Arbitrary Units	Experiment 3	Arbitrary Units	Experiment 4
Control	1625648	Control	1444326	Control	1416184	Control	2540548
Control	1781062	2h	772134	Control	2896062	Control	4822276
2h	955648	4h	597426	2h	1389648	2h	2904740
4h	880527	2h PI	1621497	4h	1440548	4h	1234012
2h PI	1811355	4h PI	1558740	2h PI	1642598	2h PI	3116811
4h PI	1530477			4h PI	1973841	4h PI	2166447
Relative Values
	Normalised Values
Control	1
2h	0.632294
4h	0.483473
Control	1
2h PI	0.948634
4h PI	0.870416
p Values
Control vs PI
2h	0.0222
	*
4h	0.0213
	*

## Sheet: 4G
Mean ZsGreen Norm to Negative ZsGreen	ZsGreen-HRI-HA	ZsGreen Positive Cells	ZsGreen Negative Cells
20.7195	2.67018	2.67018
12.613	1.18529	1.18529
24.2974	1.49939	1.49939
1.91362	2.57709		2.57709
17.3824	0.917959	0.917959
0.560263	1.87476		1.87476
0.556898	1.07004		1.07004
0.702246	0.817118		0.817118
1.31998	1.54005		1.54005
0.987963	1.16368		1.16368
0.759578	0.927624		0.927624
0.699017	0.97467		0.97467
2.10607	0.945038	0.945038
1.2831	1.47623		1.47623
0.557033	0.986341		0.986341
23.8691	0.958806	0.958806
4.63418	0.843286	0.843286
2.42973	1.34603	1.34603
1.83838	1.03047		1.03047
24.2831	1.64281	1.64281
26.7649	2.44169	2.44169
14.9883	0.818121	0.818121
0.98083	1.88351		1.88351
18.4008	1.21255	1.21255
18.8097	0.854957	0.854957
11.9138	0.891792	0.891792
15.2811	0.778642	0.778642
16.4196	0.955979	0.955979
1.07033	1.30527		1.30527
0.539941	0.426521		0.426521
0.578297	0.921059		0.921059
0.737372	0.964094		0.964094
1.16278	0.677255		0.677255
0.745851	0.943397		0.943397
1.56141	0.991447		0.991447
1.53221	1.33919		1.33919
4.21684	1.25476	1.25476
22.6892	1.03239	1.03239
23.8164	0.826145	0.826145
0.550842	0.893433		0.893433
1.47636	1.19869		1.19869
26.4358	2.33948	2.33948
18.4389	0.880121	0.880121
1.07006	1.34302		1.34302
1.6209	1.37448		1.37448
1.26009	1.15939		1.15939
0.831983	1.03248		1.03248
1.03668	1.35752		1.35752
1.89316	1.06357		1.06357
27.5223	2.06741	2.06741
24.7182	2.27694	2.27694
22.1239	0.765604	0.765604
1.90123	1.22814		1.22814
0.864955	1.11782		1.11782
1.31876	1.4786		1.4786
0.962123	1.05016		1.05016
0.581123	1.18483		1.18483
0.604675	1.41706		1.41706
2.04322	1.44076	1.44076
0.600772	1.26634		1.26634
1.06158	1.51461		1.51461
1.54136	0.822498		0.822498
0.564839	0.663396		0.663396
1.20518	0.755757		0.755757
19.1857	0.975582	0.975582
19.3231	1.38505	1.38505
6.21013	0.70716	0.70716
16.6461	2.19387	2.19387
1.30504	0.834989		0.834989
19.635	1.50176	1.50176
17.0439	0.818851	0.818851
17.9718	0.862706	0.862706
20.0937	0.572494	0.572494
18.5954	0.897171	0.897171
0.743159	0.795327		0.795327
0.59189	0.73041		0.73041
0.713417	0.861156		0.861156
1.19145	0.905741		0.905741
23.5387	1.67472	1.67472
2.00997	0.900089		0.900089
1.11137	0.730684		0.730684
0.981772	0.892156		0.892156
1.34205	0.72886		0.72886
0.854727	1.01698		1.01698
27.7196	0.845383	0.845383
15.0708	0.871733	0.871733
1.13129	0.676069		0.676069
11.5044	0.936741	0.936741
1.06602	1.05089		1.05089
2.1848	1.12365	1.12365
1.33115	1.16495		1.16495
1.07867	0.785116		0.785116
21.1948	1.6698	1.6698
25.0265	1.9456	1.9456
10.2053	0.740804	0.740804
7.29553	0.744451	0.744451
0.877741	1.0374		1.0374
0.799414	1.16532		1.16532
0.921749	1.53321		1.53321
0.837635	1.06539		1.06539
18.6204	1.42389	1.42389
0.560801	1.50103		1.50103
15.5444	0.764328	0.764328
1.29656	1.11089		1.11089
0.884873	0.947226		0.947226
1.06346	0.798701		0.798701
0.724587	1.14289		1.14289
0.547074	0.836448		0.836448
3.73612	1.2378	1.2378
15.2139	0.891518	0.891518
2.0743	1.40001	1.40001
16.7347	0.523259	0.523259
2.04631	1.44331	1.44331
24.7291	1.53814	1.53814
11.7651	1.67937	1.67937
2.83213	1.11463	1.11463
0.578835	0.883768		0.883768
1.59021	1.19422		1.19422
0.763481	0.922427		0.922427
14.8601	1.12602	1.12602
17.8948	1.08727	1.08727
0.609116	0.902824		0.902824
0.596869	0.642881		0.642881
0.709918	0.592643		0.592643
13.3123	0.702966	0.702966
0.845576	0.49545		0.49545
21.0545	1.23917	1.23917
0.556495	0.575411		0.575411
23.8176	0.991173	0.991173
1.27597	0.526267		0.526267
12.2857	0.811921	0.811921
3.70839	0.491438	0.491438
1.63005	0.811192		0.811192
16.0005	0.839092	0.839092
0.622843	0.790678		0.790678
2.72999	0.520888	0.520888
0.75729	0.852039		0.852039
6.65748	0.618629	0.618629
1.07477	0.633855		0.633855
0.677887	0.561279		0.561279
0.750157	0.669778		0.669778
0.85069	0.917686		0.917686
0.578566	0.647987		0.647987
1.46559	0.768887		0.768887
0.629438	0.492988		0.492988
1.37731	0.531647		0.531647
15.5318	0.881215	0.881215
1.05929	0.562555		0.562555
