# Supplementary material for: The switch-like expression of heme-regulated kinase 1 mediates neuronal proteostasis following proteasome inhibition
Source: eLife. 2020 Apr 24;9:e52714. doi: 10.7554/eLife.52714 (PMC7224698; doi:10.7554/eLife.52714)
Supplement: Figure 5—figure supplement 1—source data 1. [file elife-52714-fig5-figsupp1-data1.xlsx]

## Sheet: A
	Experiment 1 (Average technical replicates)
	ATF4	Mono	Poli	mono/(mono+poli)	*100	-100	relative to total
	Control	0.5378	0.0623409	0.896123	89.6123	10.3877	13.0162
	PI (2h)	0.183365	0.416222	0.305819	30.5819	69.4181	86.9838
						79.8058
	Experiment 2 (Average technical replicates)
	ATF4	Mono	Poli	mono/(mono+poli)	*100	-100	relative to total
	Control	150800	10170	0.936821	93.6821	6.31795	8.84221
	PI (2h)	22220	41510	0.348658	34.8658	65.1342	91.1578
						71.4521
		All experiments Nomalised
	Control	1
	PI (2h)	8.5
		t-test Control vs PI
		P value	0.0377
		P value summary	*

## Sheet: B AND C
Figure Supl. 7C
Transfection 1
	Mono	poly	mono/(mono+poli)	*100	100-mono	Normalised values
c-wt	0.817155	0.182845	0.817155	81.7155	18.2845	12.6398
PI-wt	0.38971	0.61029	0.38971	38.971	61.029	42.1884
c-opt	0.759547	0.240453	0.759547	75.9547	24.0453	16.6221
PI-opt	0.587005	0.412995	0.587005	58.7005	41.2995	28.5497
					144.658	100
Transfection 2
	Mono	poly	mono/(mono+poli)	*100	100-mono	Normalised values
c-wt	35.3013	25.9244	0.576577	57.6577	42.3423	15.5382
PI-wt	9.67445	50.9944	0.159463	15.9463	84.0537	30.8449
c-opt	121.825	284.492	0.299827	29.9827	70.0173	25.694
PI-opt	71.5212	227.624	0.239085	23.9085	76.0915	27.923
Transfection 3
	Mono	poly	mono/(mono+poli)	*100	100-mono	Normalised values
c-wt	3.32169	1.25558	0.725692	72.5692	27.4308	11.3767
PI-wt	0.303994	1.03938	0.226292	22.6292	77.3708	32.0888
c-opt	133.471	140.406	0.487338	48.7338	51.2662	21.2622
PI-opt	14.0163	79.7189	0.149531	14.9531	85.0469	35.2724
					241.115	100
	Average Norm. to Control				c-wt vs PI-wt
	c-wt	1			P value	0.0045
	PI-wt	2.65764			P value summary	**
	c-opt	1			c-opt vs PI-opt
	PI-opt	1.44303			P value	0.056
					P value summary	ns
Figure Supl. 7B
	All experiments Normalised
wt-c	1
opt-c	1.57751
	wt-c vs opt-c
	P value	0.0029
	P value summary	**
