# Supplementary material for: The switch-like expression of heme-regulated kinase 1 mediates neuronal proteostasis following proteasome inhibition
Source: eLife. 2020 Apr 24;9:e52714. doi: 10.7554/eLife.52714 (PMC7224698; doi:10.7554/eLife.52714)
Supplement: Figure 5—figure supplement 2—source data 1. [file elife-52714-fig5-figsupp2-data1.xlsx]

## Sheet: A
Normalised protein synthesis (AU)
	Experiment 1	Experiment 2
	2 Biological Replicates	2 Biological Replicates
Control	1	1
PI	0.135042	0.089894
PI+AA	0.0745282	0.0434481
All experiments normalised
Control	1
PI	0.112468
PI+AA	0.0589881
t-test
Control vs PI		PI vs PI+AA
P value	0.0006	P value	0.1903
P value summary	***	P value summary	ns

## Sheet: B
Normalised protein synthesis (AU)
	Experiment 1	Experiment 2
	2 Biological Replicates	2 Biological Replicates
Control	1	1
PI	0.389816	0.350162
PI+Mitotempo	0.306349	0.242488
	All experiments normalised
Control	1
PI	0.369989
PI+Mitotempo	0.274418
t-test
Control vs PI		PI vs PI+Mitotem
P value	0.001	P value	0.1261
P value summary	***	P value summary	ns

## Sheet: C
Normalised protein synthesis (AU)
Experiment 1	Protein Synthesis (AU)
	2 Biological Replicates
Control	1
PI	0.389816
PI+Trolox	0.472878
PI+NAC	0.349859
Experiment 2	Protein Synthesis (AU)
	2 Biological Replicates
Control	1
PI	0.123265
PI+Trolox	0.115827
Experiment 3	Protein Synthesis (AU)
	2 Biological Replicates
Control	1
PI	0.274318
PI+NAC	0.157966
	All experiments normalised
Control	1
PI	0.262467
PI+Trolox	0.294352
PI+NAC	0.253913
	Control vs PI
P value	0.0007
P value summary	***
	PI vs PI+Trolox vs PI+NAC
ANOVA summary
F	0.0317
P value	0.969
P value summary	ns

## Sheet: D
Normalised protein synthesis (AU)
Experiment 1	Protein synthesis (AU)
	2 Biological Replicates
Control	1
PI	0.242524
L-SMTC	0.232083
PI+L-NNA	0.196305
Experiment 2	Protein synthesis (AU)
	2 Biological Replicates
Control	1
PI	0.276764
L-SMTC	0.313062
PI+L-NNA	0.203966
	All experiments normalised
Control	1
PI	0.259644
L-SMTC	0.272572
PI+L-NNA	0.200135
Control vs PI
P value	0.0005
P value summary	***
PI vs PI+L-SMTC vs PI+L-NNA
ANOVA summary
P value	0.248
P value summary	ns

## Sheet: E
Normalised protein synthesis (AU)
Exper 1	Protein synthesis (AU)
	2 Biological Replicates
Control	1
PI	0.119341
PI+LMMA	0.202433
Exper 2	Protein synthesis (AU)
	2 Biological Replicates
Control	1
PI	0.126868
PI+LMMA	0.216539
Exper 1	Protein synthesis (AU)
	2 Biological Replicates
Control	1
PI	0.242524
PI+7-Nitroindazole	0.288106
Exper 2	Protein synthesis (AU)
	2 Biological Replicates
Control	1
PI	0.29942
PI+7-Nitroindazole	0.320848
	All experiments normalised
Control	1
PI	0.197038
PI+LMMA	0.209486
PI+ 7-Nitroindazole	0.304477
Control vs PI
P value	< 0,0001
P value summary	****
PI vs PI+LMMA vs PI+7-Ni
ANOVA summary
P value	0.2769
P value summary	ns

## Sheet: F
Normalised protein synthesis (AU)
Exper 1	Protein synthesis (AU)
	2 Biological Replicates
Control	1
PI	0.205448
PI+CoPPIX	0.275692
Exper 1	Protein synthesis (AU)
	2 Biological Replicates
Control	1
PI	0.139105
PI+CoPPIX	0.276189
	All experiments normalised
Control	1
PI	0.172276
PI+CoPPIX	0.275941
	Control vs PI
	P value	0.0016
	P value summary	**
	PI vs PI+CoPPIX
	P value	0.0889
	P value summary	ns

## Sheet: G
Normalised protein synthesis (AU)
SnPPIX	Protein Synthesis (AU)		ZnPPIX	Protein Synthesis (AU)
Exper 1	2 Biological Replicates		Exper 1	2 Biological Replicates
Control	1		Control	1
PI	0.165461		PI	0.295507
PI+SnPP	0.147822		PI+ZnPP	0.183225
Exper 2	2 Biological Replicates		Exper 2	2 Biological Replicates
Control	1		Control	1
PI	0.331714		PI	0.168074
PI+SnPP	0.15504		PI+ZnPP	0.180765
All experiments normalised
Control	1		Control vs PI
PI	0.240189		P value	0.0011
PI+ZnPPIX	0.181995		P value summary	**
PI+SnPPIX	0.151431
			ANOVA (PI,ZnPPIX,SnPPIX)
			P value	0.3469
			P value summary	ns

## Sheet: H
Control	PI	PI+Hemin
26.107	8.294	23.673
61.313	11.075	37.032
41.108	4.895	33.009
32.046	4.455	21.949
41.525	10.723	11.526
23.602	10.649	7.027
37.617	7.153	24.272			ANOVA
30.476	3.969	24.542
32.19	6.401	25.717			Dunnett's multiple comparisons test	Mean Diff,	95% CI of diff,	Significant?	Summary
25.263	10.565	23.695
53.991	7.908	12.637			ctrl vs. PI	28.51	26,81 to 30,20	Yes	****
36.62	9.053	16.05			ctrl vs. PI+Hemin	13.35	11,72 to 14,98	Yes	****
56.949	7.817	15.657			PI vs. PI+Hemin	-15.16	-16,89 to -13,43	Yes	****
48.646	4.775	20.441
40.094	8.063	24.286
36.893	7.588	28.964
64.818	4.647	20.452
58.49	9.215	23.567
55.72	7.875	15.918
51.139	10.604	29.079
67.285	9.44	27.027
25.513	11.539	22.029
31.447	6.782	6.59
44.345	9.341	19.182
16.69	10.362	27.169
53.267	8.857	22.356
30.744	9.874	26.144
49.578	8.792	21.334
34.516	7.439	12.222
25.395	3.809	12.152
53.318	8.238	10.643
32.1	6.539	8.198
42.844	10.769	19.12
48.918	7.634	22.233
39.577	8.411	27.603
50.07	5.303	9.399
36.973	6.786	15.03
34.989	3.794	27.732
50.803	14.429	22.433
31.84	8.419	19.42
28.582	6.075	15.602
29.121	4.272	6.662
34.777	4.014	13.048
43.522	1.724	14.545
41.253	5.099	12.089
45.619	4.058	11.707
27.321	8.579	19.937
39.048	6.489	29.762
31.217	6.023	26.394
23.164	4.021	24.032
37.383	7.553	20.206
44.282	4.854	25.294
28.834	5.791	25.353
35.056	17.125	17.124
46.463	6.004	25.063
27.326	5.864	14.358
41.071	7.59	19.3
44.673	7.549	8.919
25.859	3.344	24.31
35.27	7.385	24.771
37.469	5.709	23.596
41.329	5.344	17.516
37.078	2.894	10.854
31.734	8.551	19.692
28.475	10.077	16.194
14.01	7.109	15.551
35.807	6.71	3.455
42.552	5.683	3.179
47.165	2.759	18.443
43.075	10.102	21.967
25.288		28.814
28.632	11.011	13.392
29.132	7.824	14.264
9.819	10.945	11.651
24.637	8.591	7.589
17.052	9.055	22.397
	8.499	9.837
42.291	6.614	8.547
34.498	9.275	15.936
35.014	7.74	7.451
44.559	5.517	18.782
23.645	5.22	9.708
45.471	8.646	14.491
32.117	9.461	25.512
26.749	8.31	10.117
21.03	6.459	17.816
20.867	10.009	17.57
41.375	5.64	29.058
51.15	9.753	16.444
48.091	9.739	5.828
24.498	14.724	11.317
32.719	7.725	11.036
53.489	9.241
47.84	13.926	18.373
41.564	6.957	24.704
41.542	6.294	17.95
43.069	7.042	12.898
36.547	8.061	10.957
33.282	7.739	22.877
49.237	10.397	9.419
49.923	10.118	28.395
28.095	9.454	27.704
53.286	14.766	35.49
31.907	7.545	17.444
54.545	8.193	15.502
46.558	3.666	38.124
38.018	2.415	22.929
34.042	5.162	31.251
51.982	6.348	30.37
42.172	7.934	16.021
27.756	9.179	22.816
53.924	3.667	26.031
34.497	6.07	26.166
43.136	4.522	32.515
37.634	5.522	44.951
37.336	10.648	26.739
55.81	7.051	27.354
57.044	13.014	42.817
43.495	15.639	41.595
46.312	9.988	4.264
41.923	5.124	45.502
41.8	9.457	8.794
28.274	8.964	19.48
28.892	7.502	16.817
51.031	7.107	9.41
56.229	4.61	42.911
34.425	4.308	35.197
48.67	2.046	39.452
39.248	8.804	37.109
41.72	8.102	28.8
40.734	7.268	31.636
43.856	10.935	34.379
38.454	7.474	29.566
34.912	6.899	13.867
40.21	7.421	30.373
32.797	8.158	17.845
45.054	6.753	28.633
43.306	5.197	18.986
41.34	5.548	28.978
44.451	6.286	28.978
36.572	2.838	33.87
	5.252	21.108
48.994	8.535	10.43
42.257		29.943
46.303	23.319	14.837
53.43	15.434	34.469
31.325	7.115	21.458
27.649	10.757	46.53
54.817	12.851	40.14
40.132	11.923	35.486
40.412	14.584	28.206
52.726	14.77	40.547
49.779	8.546	28.544
40.223	13.246	42.983
34.081	5.963	17.189
38.78	14.09	40.786
33.564	16.227	7.348
36.821	13.271	24.217
39.182	16.614	15.112
35.607	10.064	26.208
33.61	7.106	16.587
47.527	6.583	20.444
47.452	15.146	19.068
38.537	7.833	18.248
49.219	9.665	33.353
41.725	10.759	31.833
32.9	9.799	29.907
30.164	6.608	30.536
70.577	8.548	28.736
47.052	10.327	22.83
48.999	10.348	17.234
36.298	16.317	28.359
36.393	7	16.241
43.618	13.169	24.446
38.466	15.242	28.596
34.656	17.329	22.742
33.659	6.992	18.412
26.716	6.91	23.66
42.865	12.798
43.798	5.919	26.276
25.722	12.836	22.866
26.587	13.295	15.973
43.509	16.305	30.105
35.193	10.945	28.498
30.678	7.826	21.707
37.826	15.343	26.331
31.396	11.806	17.147
39.012	9.563	24.061
36.606	11.806	21.381
41.914	8.885	30.061
44.269	9.275	33.017
39.143	10.765	12.268
33.264	5.059	38.637
32.302	5.945	28.396
23.728	5.984	23.4
46.447	20.934	24.193
28.984	18.911	47.821
30.393	16.196	29.679
30.742	21.257	27.831
28.508	7.476	44.134
		40.859
46.853	6.391	17.744
33.56	9.005	30.034
36.162	12.281	42.684
18.919	7.313	25.886
26.558	5.007	31.017
32.708	8.404	42.552
38.834	4.109	38.192
28.945	6.306	22.989
36.049	5.124	33.076
29.737	9.574	43.551
31.221	3.008	48.072
30.431	13.903	34.02
42.444	10.017	24.396
34.027	10.145	44.214
26.967	8.004	23.902
26.26	11.203	23.326
30.179	14.861	32.852
34.552	12.999	43.151
20.583	12.384	45.691
18.895	18.514	34.36
32.873	17.648	36.74
37.222	7.376	22.89
34.489	8.239	24.737
25.992	14.909	20.184
22.052	6.913	19.575
29.227	7.09	14.5
30.364	6.339	39.794
20.443	5.909	24.179
14.237	4.72	7.616
38.85	5.997	16.046
33.485	3.259	16.203
26.502	6.635	18.075
24.616	10.18
27.405	11.964	46.67
32.068	5.141	29.219
31.131	10.18	26.464
33.313	8.774	35.834
32.626	5.768	32.755
21.858	9.157	34.933
26.673	11.654	30.167
21.036	5.899	25.504
24.922	10.566	37.087
37.714	12.381	20.304
36.91	9.486	25.268
35.633	7.288	22.001
	11.388	27.477
		17.15
		16.049
		25.014
		32.201
		47.055
		25.095
		21.996
		27.039
		38.894
		21.225
		25.009
		17.936
		47.099
		21.889
		28.293
		16.259
		34.379
		21.844
		27.189
		20.133
		17.131
		22.24
		11.985
		22.738
		16.845
		28.131
		18.748
		22.044
		15.302
		31.239
		23.083
		20.801
		26.313
		31.551
		29.395
		18.781
		19.51
		14.507
		15.085
		18.032
		30.983

## Sheet: J
Normalised protein synthesis (AU)
	Protein Synthesis (AU)
Exper 1	2 Biological Replicates
Control	1
PI	3.13815
PI+Hemin	2.16938
Exper 2	2 Biological Replicates
Control	1
PI	2.8655
PI+Hemin	1.92179
All experiments normalised
Control	1
PI	3.00182
PI+Hemin	2.04559
	Tukey's multiple comparisons test	Mean Diff,	95% CI of diff,	Significant?	Summary
	Control vs PI	-2.002	-2,630 to -1,373	Yes	**
	Control vs PI_Hemin	-1.046	-1,674 to -0,4174	Yes	*
	PI vs PI_Hemin	0.956	0,3279 to 1,584	Yes	*

## Sheet: L
Normalised protein synthesis (AU)
	Protein Synthesis (AU)
Exper 1	2 Biological Replicates
Control	1
Hemin	0.646408
Exper 2	2 Biological Replicates
Control	1
Hemin	0.797467
All experiments normalised
Control	1
Hemin	0.713576
		Unpaired t test Control vs Hemin
		P value	0.066
		P value summary	ns
