# Supplementary material for: The switch-like expression of heme-regulated kinase 1 mediates neuronal proteostasis following proteasome inhibition
Source: eLife. 2020 Apr 24;9:e52714. doi: 10.7554/eLife.52714 (PMC7224698; doi:10.7554/eLife.52714)
Supplement: Figure 5—source data 1. [file elife-52714-fig5-data1.xlsx]

## Sheet: 5B
	ddPCR for Actin mRNA in ribosome purified fractions
	Exper1
	Actin	Monosomes	Polisomes	mono/(mono+poli)	*100	-100	Relative to total
	Control	0.614684	8.72023	0.0658479	6.58479	93.4152	70.0448
	PI 2h	6.94979	4.62348	0.600504	60.0504	39.9496	29.9552
						133.365
	Exper2
	Actin	Monosomes	Polisomes	mono/(mono+poli)	*100	-100
	PI 2h	39506.7	44773.3	0.468755	46.8755	53.1245	36.8722
	Control	8893.33	89406.7	0.0904713	9.04713	90.9529	63.1278
						144.077
		Actin mRNA in Polysomes
		Experiment 1	Relative to total
		Control	63.1278
		PI 2h	36.8722
		Experiment 2
		Control	70.0448
		PI 2h	29.9552
		All experiments normalised
		Control	1
		PI 2h	0.505873
			t-Test
			P value	0.0242
			P value summary	*

## Sheet: 5C
ddPCR for HRI mRNA in ribosome purified fractions
Exper1
HRI	Monosomes	Polisomes	mono/(mono+poli)	Relative to total
Control	0.211743	0.0979721	0.68367	48.1726
PI 2h	0.307579	0.158682	0.65967	51.8274
Exper2
HRI
Control	2.09462	4.64729	0.310687	43.841
PI 2h	1.00741	7.60207	0.117012	56.159
Exper3
HRI
Control	2.80498	0.977801	0.741513	43.8683
PI 2h	3.21086	1.58682	0.669252	56.1317
HRI mRNA in Polysomes
Experiment 1	Relative to total
Control	48.1726
PI 2h	51.8274
Experiment 2
Control	43.841
PI 2h	56.159
Experiment 2
Control	43.8683
PI 2h	56.1317
All experiments	Average
Control	1			t-Test	0.0357
PI 2h	1.21213			P value summary	*

## Sheet: 5G
Mean ZsGreen norm to neg ZsGre	HRI-HA wt ZG pos	HRI-HA wt ZG neg	HRI-HA opt ZG pos	HRI-HA opt ZG neg
48.34	1.115
1.82		0.724
43.77	0.878
43.05	0.515
46.58	0.448
49.11	1.07
38.63	0.984
40.89	0.76
51.28	1.03
1.15		1.027
35.12	0.81
0.7		0.989
0.84		1.369
1.06		0.974
0.57		1.167
0.74		1.088
1.14		1.205
0.44		0.901
46.47	0.936
48.32	1.224
1.58		1.043
1.05		0.858
51.77	1.507
19.01	0.484
49.83	1.009
30.42	1.156
48.87	0.735
0.68		1.172
0.49		0.889
0.71		1.056
0.69		1.123
40	0.439
44.13	0.964
0.45		0.931
50.09	0.593
1.82		0.96
1.95		1.212
38.85	0.785
47.53	0.648
49.99	1.393
50.32	1.005
51.02	0.964
43.96	0.823
48.76	0.852
30.42	0.471
50.89	0.769
1.34		1.077
1.25		0.884
0.64		1.305
0.86		0.884
2.22		1.042
0.74		1.232
48.51	1.048
29.7	0.988
44.88	0.855
42.76	0.595
51.87	1.184
34.72	1.197
0.81		0.918
22.05	1.007
0.98		1.02
0.88		0.983
0.6		1.111
0.71		1.168
1		0.977
2.06		0.92
42.99	0.615
8.28	0.547
48.55	0.965
0.62		1.258
0.56		1.104
1.02		0.857
50.64	0.876
1		1.442
51.17	0.847
51.15	1.739
11.64	0.959
2.43		1.192
0.64		1.033
0.74		1.003
1.24		1.062
1.22		0.903
0.58		0.969
45.14	0.785
41.53	0.881
42.05	0.536
36.12	0.63
35.28	0.96
40.9	0.768
1.74		0.976
1.54		0.874
2.18		1.222
42.7	0.716
1.56		0.894
1.02		0.795
1.34		0.742
43.32	0.898
46.57	1.069
0.58		1.077
0.62		0.932
0.94		0.603
47	0.976
44.92	0.738
0.79		0.995
0.81		0.691
0.59		1.106
0.69		1.04
0.95		1.122
35.83	0.355
48.07	0.574
0.48		1.316
0.97		0.842
1.02		0.651
42.91	1.036
2.09		1.282
45.95	1.162
25.67	0.734
42.34	0.452
0.55		1.145
29.43	0.57
45.86	0.831
0.5		1.034
0.69		0.942
1.12		0.898
48.26	1.074
43.96	1.014
2.15		0.31
0.47		1.25
20.27	0.729
43.86	0.934
0.47		0.985
46.97	0.959
1.19		0.604
1.24		0.959
1.22		1.03
37.59	0.757
0.57		1.26
41.87	0.713
0.87		0.976
0.6		1.062
0.99		0.886
0.98		0.952
0.95		1.156
1.12		1.187
49.56	0.912
44.98	0.487
21.46	0.477
1.03		1.022
41.61	0.664
41.71	0.8
39.74	0.397
46.61	0.653
19.07	0.801
38.07	0.505
29.5	0.771
0.7		1.156
0.48		0.763
0.93		0.641
14.67	0.658
0.51		0.682
0.7		0.906
14.87			6.216
7.69			5.254
0.45				1.146
0.55				0.858
0.54				1.02
0.56				1.144
2.89				1.057
4.35			5.713
31.43			3.47
0.46				0.719
0.51				0.947
0.55				0.856
0.44				0.538
0.42				0.608
0.49				0.552
0.45				0.879
15.35			1.406
23.21			5.376
4.62			3.546
0.54				1.096
0.77				0.652
11.02			7.168
10.75			7.297
30.31			1.078
29.53			3.064
27.93			10.039
13.3			6.357
0.55				0.711
0.81				1.108
30.88			1.198
6.46			5.764
8.57			6.279
0.51				1.031
21.68			5.488
0.46				1.095
0.62				1.07
12.76			8.392
0.58				1.083
15.43			4.483
0.72				0.754
5.34			1.289
22.01			2.028
32.16			1.203
14.59			6.636
21.33			5.134
7.82			7.278
4.69			6.232
23.6			3.379
20.6			5.754
0.51				0.969
8.37			5.656
0.66				1.098
0.77				1.087
0.59				1.057
17.44			4.848
2.76				2.772
0.49				0.848
6.24			4.25
8.69			4.598
8.11			5.664
14.57			1.027
0.76				0.901
11.29			4.959
7.77			5.586
0.51				0.949
0.54				1.015
0.48				0.648
0.46				1.324
0.54				1.258
9.84			8.024
8.16			4.955
24.13			5.426
19.72			6.832
14.06			6.994
36.98			3.638
18.62			6.782
0.56				1.071
0.53				1.181
1.36				1.4
17.22			6.819
21.49			7.78
7.21			4.23
0.59				0.992
8.92			1.911
16.48			4.711
32.91			4.804
0.46				1.197
20.9			0.876
0.71				1.202
0.66				1.048
17.21			0.781
0.46				1.104
1.23				1.295
30.88			1.958
22.03			7.5
0.68				1.413
14.97			5.52
7.39			5.609
3.68			6.54
32.7			2.907
0.45				0.925
0.65				1.131
0.69				0.791
0.52				1.024
0.44				0.846
4.34			5.719
0.58				1.222
6.52			9.078
0.54				0.723
0.48				0.89
6.38			4.966
0.49				0.785
14.5			5.831
3.66			3.91
0.64				1.199
15.81			10.01
20.18			8.576
8.09			6.838
0.48				1.118
8.12			1.132
1.14				1.155
27.14			7.248
32.09			0.888
0.45				0.956
5.58			5.188
15.1			6.634
0.55				1.059
62.31	0.375
65.33	1.104
61.21	0.982
64.52	0.348
63.32	0.971
0.95		1.109
0.74		1.192
0.65		1.438
1.79		1.289
1.37		1.144
0.6		0.728
0.62		0.809
0.71		0.658
0.59		0.715
69.68	0.63
69.7	0.523
61.57	0.324
49.13	0.559
53.06	0.43
0.73		0.229
0.63		1.131
1		1.57
0.72		1.189
2.04		1.22
0.64		1.516
0.79		1.288
0.83		1.531
0.61		0.917
0.93		1.099
0.77		1.257
0.62		1.328
0.96		1.404
0.61		1.211
0.87		0.753
1.38		0.396
57.25	0.531
48.21	0.519
57.77	0.797
49.76	1.378
52.97	0.845
52.54	0.845
10.27	1.301
1.1		1.148
0.81		1.372
0.62		1.184
1.26		1.114
0.7		1.113
0.77		1.081
0.75		0.831
0.89		1.201
0.79		1.227
0.78		0.927
2.13		0.826
0.65		1.115
0.59		1.307
0.9		1.37
61.94	0.281
36.88	0.74
70.18	0.647
69.78	0.987
61.71	0.736
62.88	0.867
0.66		1.191
1.35		0.891
0.64		1.458
0.66		1.342
0.74		1.245
0.62		1.46
0.63		1.403
0.81		1.045
1.12		1.047
2.23		1.261
1.02		0.583
2.56		0.433
0.57		0.753
2.41		1.073
1.15		0.879
64.09	0.349
0.59		0.926
66.37	0.431
58.89	0.547
1.63		1.442
1.95		1.422
1.3		1.184
0.88		1.169
61.26	0.431
1.66		1.37
0.75		1.441
0.91		1.204
61.61	0.989
54.8	0.337
50.85	0.674
28.59	0.791
1.86		1.107
0.84		1.401
0.9		1.026
0.99		1.014
0.68		1.246
2.34		0.244
0.58		0.414
1.35		1.353
0.68		0.588
0.6		0.527
19.66	1.151
30.48	0.308
64.59	0.308
46.37	0.958
51.48	1.479
63.33	0.771
44.98	0.608
59.91	0.877
3.11		0.898
0.62		1.407
0.61		1.381
1.04		1.134
0.7		0.318
30.7	0.287
2.63		0.876
1.83		1.063
0.67		1.192
1.08		0.644
0.92		0.84
1.56		0.86
1.27		1.37
0.72		0.22
0.73		1.146
1.88		1.049
1.08		0.708
0.76		0.95
0.91		1.447
1.05		1.562
0.81		0.203
0.94		1.192
1.19		1.151
1.14		0.678
2.52		0.613
0.67		0.763
64.82	0.608
51.39	1.105
51.87	0.693
62.22	0.477
62.31	0.694
56.88	0.911
38.94	0.29
13.12	0.279
0.62		1.158
0.79		1.148
0.65		1.116
1.23		1.073
1.09		1.26
0.85		0.813
1.17		0.376
0.99		1.448
1.17		1.093
0.72		1.162
0.89		1.077
0.73		0.682
2.47		0.773
1.5		1.302
1.25		0.604
0.79		0.756
68.71	1.151
60.36	1.162
55.71	0.904
57.68	1.128
41.12	0.278
70.18	0.827
43.52	0.361
56.87	0.666
0.66		0.943
1.19		0.779
1.34		1.733
0.69		0.939
0.87		1.765
1.23		0.865
0.69		1.634
0.83		1.112
0.7		1.198
0.61		1.265
0.73		0.735
1.73		0.583
1.18		1.006
0.61		1.042
0.78		0.985
1.12		0.842
1.02		0.545
10.82	0.427
0.82		0.482
54.96	0.821
65.65	0.574
22.54	0.968
62.01	0.777
63.8	0.314
62.16	0.872
68.68	1.037
51.64	0.423
43.6	0.818
40.44	0.953
1.6		0.746
0.59		0.719
0.7		1.238
0.61		1.202
14.18	0.757
11.52	0.192
1.34		0.853
0.84		0.74
0.71		1.768
0.76		1.287
0.67		1.05
1.67		1.067
0.95		1.124
1.62		1.265
0.93		1.157
1.02		0.741
0.73		1.158
1.5		0.868
0.59		0.639
68.55	0.441
54.5	0.867
68.09	1.192
68.96	1.079
59.92	0.797
31.74	0.667
1.14		1.505
0.69		1.461
0.89		1.298
1.4		1.074
1.4		1.2
1.33		1.387
1.39		1.279
1.7		0.71
1.17		1.006
0.82		1.289
0.63		0.481
0.71		1.015
0.61		0.669
1.56		1.105
0.61		0.691
0.62		1.281
0.6		0.835
0.78		1.321
67.84	0.931
62.48	0.692
60.02	1.11
64.37	0.821
45.59	0.518
45.04	0.818
61.83	0.218
64.02	0.677
1.52		0.755
0.78		1.12
1.34		1.052
19.65	1.066
1.17		1.015
1.02		1.525
0.9		0.943
1.01		1.288
0.62		0.912
0.61		0.288
0.7		0.969
1.2		1.22
1.1		1.059
0.67		0.923
0.74		0.794
21.04	0.962
41.67	0.536
69.23	0.384
58.67	0.579
26.77	0.457
69.93	0.903
58.86	1.199
42.78	0.591
57.99	0.455
50	0.806
0.61		0.854
0.94		0.671
0.83		1.038
1.21		0.975
1.12		1.147
0.85		1.042
0.94		1.263
1.53		0.432
0.73		1.252
1.56		0.75
0.65		1.078
4.2	0.724
1.11		1.183
0.78		0.893
0.68		0.995
1.8		1.154
0.76		1.018
0.99		0.968
60.39	0.898
68.92	0.917
55.76	0.691
47.42	0.832
51.93	0.7
52.26	0.887
22.71	0.461
59.86	0.787
20.89	0.163
49.85	0.612
41.48	0.451
25.42	0.331
2.46		1.051
1.58		1.03
1.66		1.098
0.72		0.278
1.13		1.168
1.01		0.601
0.77		0.908
0.6		1.023
1.01		1.224
0.61		0.749
1.04		0.749
0.99		0.899
1.26		0.243
0.79		1.063
1.06		0.418
0.62		0.883
60.15	0.908
61.42	0.739
51.25	0.925
57.27	0.743
0.81		1.149
0.7		0.559
0.75		1.41
1.02		0.65
0.75		1.127
1.72		0.453
0.73		0.791
1.23		0.993
0.67		0.817
15.46	1.097
9.12	0.276
0.7		0.76
1.16		0.881
0.86		0.99
0.93		0.946
0.91		0.577
0.67		0.705
0.62		0.815
60.85	0.97
58.96	0.304
50.29	0.903
62.12	1.056
66.42	1.115
60.87	0.931
65.57	0.414
0.83		1.438
25.53	0.483
41.24	1.118
0.64		0.831
0.74		1.098
0.61		0.892
0.81		0.864
0.9		1.021
1.3		1.202
0.71		0.596
0.6		1.073
0.65		0.595
0.66		1.109
0.69		1.114
0.72		1.117
0.74		0.832
1.28		0.674
1		0.348
0.87		1.014
1.1		1.398
0.69		0.903
0.67		0.921
0.6		0.47
1.08		1.104
0.69		0.736
1.16		0.903
1.86		1.015
4.22	0.936
0.74		1.167
6.41	0.883
0.68		0.939
1.36		1.018
0.65		1.084
0.59		0.951
0.79		0.721
44.92	0.684
13.01			5.651
12.99			4.364
6.68			2.564
0.58				1.199
0.57				0.879
0.61				1.55
0.6				1.26
0.68				1.394
9.38			0.384
0.67				0.364
12.96			0.997
5.33			0.927
0.57				1.43
0.56				0.725
0.57				1.552
0.58				1.093
0.59				0.999
0.73				1.124
0.63				1.262
0.58				1.013
1.98				0.996
0.58				1.244
0.56				1.122
0.57				1.625
0.57				1.046
0.57				1.243
0.69				0.976
8.97			4.055
29.64			4.679
11.82			5.169
0.61				1.48
0.63				1.187
0.6				1.425
0.58				1.87
0.59				1.711
0.61				1.497
0.62				1.41
0.59				1.279
0.6				1.013
0.67				1.147
0.64				1.062
0.57				0.938
0.59				0.803
0.61				0.933
0.59				1.407
0.68				0.823
0.65				1.132
0.7				1.019
4.52			1.838
0.56				1.377
41.33			0.888
33.26			1.609
0.73				1.239
0.72				1.34
15.23			1.091
12.76			3.4
5.13			4.201
24.87			1.392
7.91			4.762
0.61				1.138
1.21				1.486
0.63				1.384
0.73				1.343
15.17			5.945
8.96			4.79
0.68				1.494
0.81				1.624
0.64				1.153
21.86			1.052
26.06			0.882
0.62				1.603
1.57				1.299
8.43			5.345
0.77				1.672
0.64				1.589
0.63				1.261
0.65				1.436
0.87				1.252
0.75				1.345
11.8			3.665
3.67				4.695
13.36			1.698
0.66				1.392
0.69				1.785
6.94			4.891
1.42				4.432
3.13				3.577
0.62				1.552
0.66				1.323
11.13			3.511
9.14			2.358
0.64				1.207
10.04			3.346
0.6				1.629
0.6				1.217
13.23			0.624
0.94				1.546
0.72				1.252
0.62				1.376
16.53			3.616
0.69				1.359
0.7				0.724
0.8				0.821
0.59				0.86
12.45			4.998
23.08			2.001
27.32			0.705
11.98			1.294
24.76			2.657
26.06			0.75
14.64			2.514
6.84			3.879
0.62				1.045
0.69				1.344
0.6				0.527
0.64				1.643
0.73				1.049
0.69				1.421
0.82				0.844
9.51			1.564
0.93				0.289
0.7				1.01
0.66				1.005
8.14			4.803
0.64				1.34
0.74				0.925
0.69				0.963
0.58				0.916
0.61				1.281
0.63				0.843
0.69				1.012
0.61				0.957
0.73				0.767
0.7				0.722
0.63				1.016
0.59				1.711
0.66				1.42
0.63				0.788
26.23			3.418
22			6.557
0.7				1.537
7.74			2.195
3.27				1.068
22.25			2.01
11.08			5.982
0.63				1.555
9.23			5.939
4.63			0.831
0.66				1.063
0.7				1.742
0.63				1.378
0.61				0.379
0.59				0.42
0.61				1.093
0.74				1.614
9.51			3.961
0.88				1.269
0.93				1.062
9.71			4.359
20.16			2.171
16.46			3.566
12.44			0.758
28.51			0.746
25.8			1.002
13.61			1.494
0.7				0.531
12.52			5.27
0.81				1.262
0.74				0.541
0.63				0.399
10.42			0.65
0.87				0.969
0.71				1.008
0.65				0.919
0.67				1.298
0.76				1.071
0.6				1.453
0.65				1.337
0.76				1.968
0.59				1.572
0.71				0.69
0.68				1.295
0.62				0.749
0.6				1.326
0.59				0.775
0.68				1.241
0.74				0.864
3.48				4.303
42.95			1.475
0.72				1.159
22.99			0.74
14.31			2.505
6.63			2.977
0.88				1.245
0.79				1.406
5.44			4.877
8.24			3.042
0.64				1.037
11.38			0.586
4.92			2.294
11.68			2.749
0.87				0.918
0.61				1.137
4.82			0.981
0.88				1.661
0.87				1.15
0.68				1.181
1.05				0.899
0.88				1.323
0.78				0.86
0.67				1.102
0.6				1.51
0.63				1.123
0.71				1.377
0.74				0.945
0.63				1.28
2.35				0.778
0.59				0.985
1.22				0.973
0.76				1.014
0.74				1.165
0.63				1.115
0.67				0.331
12.04			6.235
39.31			0.581
6.74			5.258
30.54			3.277
0.63				1.238
4.27			0.886
17.03			4.865
30.7			0.902
0.7				1.05
6.52			5.891
0.62				1.702
0.65				1.637
2.61				0.683
0.6				1.758
0.65				0.997
0.6				0.908
0.68				1.277
1.37				0.945
0.66				1.002
0.71				1.189
0.78				0.839
1.05				1.13
0.66				1.088
0.68				1.321
0.71				0.41
0.64				0.709
0.63				0.841
5.87			5.495
48.97			1.251
22.55			2.524
0.68				0.583
0.67				0.78
0.74				0.843
0.72				1.055
8.71			1.012
0.65				0.761
0.87				1.303
1.01				0.526
0.76				1.54
0.64				0.967
0.9				0.849
0.97				1.289
0.72				1.188
0.7				1.277
0.71				1.378
8.71			4.464
0.6				0.36
0.71				0.684
0.84				0.265
0.67				0.585
0.66				1.085
1.79				0.818
0.85				1.17
5.83			2.286
0.96				0.754
12.34			4.306
7.46			4.531
31.48			1.205
5.56			3.084
10.99			0.977
12.52			5.097
9.34			4.698
9.17			1.591
14.85			4.166
35.3			1.665
9.45			2.506
0.69				0.774
0.64				1.025
0.61				0.699
0.71				1.086
0.68				0.916
0.59				0.605
6.43			3.093
5.15			3.191
7.47			2.31
0.64				0.899
0.68				0.777
0.7				0.805
7.74			0.702
5.57			4.279
0.73				0.641
0.62				1.341
7.41			3.823
11.56			4.569
13.54			4.786
0.72				1.558
6.45			2.822
14.47			4.429
0.59				0.867
0.86				0.435
0.66				0.924
0.81				0.748
1.17				1.228
0.67				1.007
20.88			1.249
0.77				1.499
20.3			3.011
11.24			3.543
14.59			2.143
0.66				0.893
23			1.1
13.55			0.659
12.42			5.209
7.04			4.471
0.63				0.602
9.07			1.903
11.97			3.588
0.69				1.338
0.66				0.827
0.64				0.947
0.62				1.187
0.95				0.984
0.84				0.967
0.9				0.642
0.89				0.858
24.62			0.604
0.69				1.128
0.74				1.307
6.5			1.792
0.72				0.921
0.93				1.07
6.51			4.183
19.73			2.174
27.92			0.638
10.87			3.342
11.14			2.636
8.26			3.073
0.83				1.097
0.66				1.004
0.7				0.377
0.76				1.236
0.67				0.258
0.66				0.744
0.66				1.22
9.95			4.604
0.74				1.451
0.81				1.066
0.65				0.911
0.67				1.329
0.64				0.541
0.72				0.268
0.62				0.756
0.66				0.908
0.62				1.386
2.11				3.266
0.79				0.225
0.61				0.729
0.78				1.292
0.59				0.893
0.61				0.712
0.85				0.733
55.75	0.776
51.62	0.989
44.2	1.135
45.22	0.398
54.31	1.056
51.31	0.639
51.8	0.526
29	1.053
48.32	1.25
51.76	0.973
53.74	0.347
30.8	0.984
0.7		0.847
0.96		0.997
0.75		0.94
0.76		1.144
0.94		0.734
1.47		1.087
0.8		0.833
0.68		0.823
1.72		0.941
0.9		0.997
0.88		1.05
0.65		0.911
0.65		0.931
0.93		1.1
0.59		1.194
1.56		0.977
1.46		1.557
0.8		1.306
1.84		1.057
1.22		0.937
1.14		1.349
1.39		1.211
0.95		1.064
1.42		1.245
42.19	0.977
28.35	0.781
49.11	0.819
48.2	0.676
47.42	0.433
13.84	0.613
46.79	0.374
45.48	0.411
50.05	0.718
43.61	0.616
50.66	0.859
38.63	0.423
52.2	0.447
35.97	0.823
47.91	0.649
46.86	0.42
45.89	0.406
39.75	0.372
30.98	0.399
9.15	1.11
9.39	0.897
0.71		0.932
0.96		0.923
0.57		0.976
1.19		0.946
0.79		0.777
2.08		0.724
1.41		0.688
0.85		0.814
1.78		0.925
1.18		0.861
0.85		0.847
1.04		0.774
1.03		0.975
2.84		0.879
1.26		0.893
0.81		0.826
0.66		0.853
0.79		0.68
0.78		0.971
0.87		0.735
5.44	0.564
1.37		0.784
0.57		0.773
0.88		0.935
0.6		0.919
0.69		0.726
0.84		0.982
0.84		0.803
0.72		0.947
0.9		0.895
0.6		0.802
0.64		1.027
0.87		1.059
0.81		0.851
0.61		0.99
0.7		0.814
1.21		0.843
0.77		0.651
0.96		0.929
0.78		0.795
0.76		0.858
1.5		1.121
0.78		0.831
1.14		1.143
0.8		0.936
0.99		1.028
0.72		1.029
0.53		0.902
0.53		0.793
0.95		1.132
0.7		1.016
50.6	0.519
49.71	0.331
43.89	0.6
47.56	0.648
46.17	0.599
52.44	0.866
52.55	0.925
29.86	0.992
40.42	0.766
34.77	0.762
28.19	0.94
49.67	0.91
50.46	0.851
46.45	0.65
20.4	0.542
48.74	0.364
1.47		1.004
0.73		0.78
1.51		0.871
0.75		0.901
0.72		0.994
1.99		0.668
1.13		0.899
0.68		0.781
0.93		0.687
1.01		0.743
0.67		0.705
1.77		0.868
0.61		0.611
1.13		0.794
0.7		0.821
0.59		0.627
1.05		0.445
0.69		1.111
0.63		0.764
0.87		0.824
1.09		0.582
0.88		0.896
1.31		0.911
0.78		0.966
0.77		0.861
1.01		0.803
1.33		0.601
0.6		0.881
1.19		0.778
1.53		0.756
1.08		0.766
1.14		0.79
1.08		0.611
1.12		0.824
0.77		0.93
1.83		0.746
1.13		0.968
0.62		0.889
2.6		0.756
1.03		0.659
0.59		0.902
0.99		0.81
1.32		0.847
1.61		0.853
1.36		0.436
0.98		0.758
0.63		0.843
0.99		0.738
0.9		0.612
0.69		0.863
0.92		0.731
0.87		1.022
0.73		0.818
0.81		0.799
0.72		0.856
0.96		0.503
0.6		1.032
0.79		0.81
0.9		0.816
0.95		0.825
0.69		0.921
1.56		0.416
49.49	0.896
48.07	0.801
48.7	0.35
16.54	0.61
30.68	0.375
48.87	0.299
19.56	0.233
42.99	0.315
50.27	0.339
47.7	1.046
49.05	0.675
0.71		0.966
1.15		1.005
0.94		0.889
0.84		1.18
1.05		1.174
0.73		1.034
1.02		1.218
1.18		1.33
1.1		0.528
2.06		1.006
0.87		1.16
0.84		1.102
0.66		0.872
1.08		0.793
1.03		1.343
1.27		1.022
1.28		1.103
1.15		1.215
3.25		1.153
0.76		1.303
0.55		1.023
0.95		0.919
0.62		0.998
0.54		1.146
0.65		0.99
1.04		0.935
1.14		0.887
0.66		0.942
0.55		0.957
0.73		0.599
0.94		1.057
0.66		1.065
52.86	0.321
31.37	1.019
43.02	0.77
45.09	1.33
16.01	1.34
14.31	1.074
46.8	1.044
50.55	1.089
51.12	0.368
38.96	0.884
50.63	0.908
43.41	0.753
0.62		0.856
0.77		0.833
1.01		1.33
7.76	0.574
1.33		1.417
2.33		1.219
1.54		0.895
1.21		0.853
0.63		1.203
1.16		1.39
1.05		1.324
0.78		1.425
0.68		1.143
1.22		1.051
0.53		0.956
0.52		0.816
2.18		1.105
0.74		1.123
1.01		0.953
0.77		0.89
0.83		1.129
0.68		1.065
46.44	1.123
47.05	0.462
38.03	0.417
51.3	0.968
51.31	0.948
53.14	0.494
52.79	1.081
48.22	0.995
50.41	0.399
50.73	0.6
27.73	0.738
21.7	0.932
44.71	0.816
50.09	0.999
50.13	1.195
0.86		1.064
1.2		0.916
0.87		0.798
0.75		0.869
8.76	1.081
0.92		1.112
1.3		0.661
1.24		0.801
1.09		1.022
1.08		0.801
1.29		0.914
0.78		1.037
1.07		1.086
0.68		0.81
0.68		1.294
0.93		0.886
0.68		1.308
1.47		0.892
0.84		1.072
0.67		1.054
0.77		1.018
1.07		1.322
1.04		1.049
1.36		0.954
9.25	0.828
1.1		0.972
1.31		1.087
1.24		1.005
0.75		1.053
1.05		1.116
1.13		1.139
0.91		1.269
35.93	0.345
47.1	0.564
52.75	0.823
44.23	0.461
52.36	0.667
39.79	1.479
52.01	0.755
52.88	0.854
0.78		0.976
0.65		1.162
0.72		0.922
0.58		1.666
1.08		1.121
0.97		1.943
0.59		1.126
0.67		1.425
1.63		1.52
1.13		1.295
53.32	1.129
34.54	1.305
53.21	0.482
51.38	1.134
43.6	1.103
42.27	0.317
18.04	1.244
43.36	0.729
17.25	1.729
21.21	0.954
49.77	0.946
51.96	0.892
25.36	0.285
0.62		1.403
0.65		0.949
0.93		1.071
0.8		0.855
1.28		1.16
0.8		1.116
0.6		1.152
0.99		1.139
1.72		1.572
0.93		1.086
1.01		1.176
1.31		1.231
1.22		1.337
2.71		1.261
0.77		1.064
0.88		1.193
1.95		1.151
0.88		1.104
1.24		1.184
0.7		0.973
1.03		1.083
0.81		1.497
0.62		1.283
1.6		0.967
1.08		1.05
1.42		1.272
1.61		1.103
1.04		0.883
0.74		1.09
1.23		1.129
0.59		1.28
0.96		1.281
0.97		1.228
0.84		1.198
0.97		1.044
0.76		0.99
0.98		1.006
51.47	0.462
45.41	0.617
52.35	0.995
41.87	0.338
32.6	0.713
38.83	0.937
51.84	0.97
52.17	1.053
48.79	0.484
48.49	0.528
48.93	0.441
22.46	0.377
40	0.29
48.53	0.709
19.97	0.401
1.4		0.89
1.27		0.958
1.21		1.09
1.1		0.808
0.92		0.973
1.01		1.289
0.85		0.897
0.96		0.945
1.01		1.215
0.74		0.975
1.21		0.954
0.96		1.022
0.82		0.937
1.13		0.994
0.65		0.925
0.82		0.803
0.83		0.946
1.4		1.239
1.12		1.085
0.87		1.092
0.9		1.058
1.29		1.101
1.03		1.038
0.83		1.15
0.96		1.106
0.72		1.007
0.62		0.994
0.8		1.072
1.49		1.194
0.71		1.049
1.48		0.966
0.67		1.306
1.33		1.104
1.01		1.101
0.67		1.308
1.14		0.961
0.97		0.976
1.13		1.004
0.93		1.087
1.06		0.628
1.79		0.902
0.62		1.08
54.4	0.637
51.17	0.768
55.16	0.886
51.25	0.505
36.8	1.268
55.04	0.948
52.48	0.415
52.93	1.045
46.44	0.688
53.56	0.855
27.66	0.337
16.52	0.46
46.61	0.413
50.46	0.428
0.84		0.907
0.75		0.784
1.46		0.735
0.64		1.035
1.51		1.249
1.32		1.081
3.08		0.882
0.98		1.172
1.07		1.04
1.03		1.197
0.91		1.298
0.86		0.837
0.55		0.985
0.65		1.123
0.97		1.216
0.79		1.472
1.35		1.136
0.72		1.09
0.53		0.784
2.08		1.139
2.02		1.005
0.82		0.868
2.58		0.756
1.16		0.899
0.87		0.962
2.39		1.351
1.09		0.352
1.09		0.724
1.16		1.064
0.93		0.98
0.66		0.858
1.97		0.967
50.12	0.353
50.05	0.771
47.93	0.925
43.46	0.46
24.29	1.077
51.65	0.612
53.81	0.852
50.39	0.429
44.67	0.837
21.55	0.803
0.61		0.787
0.79		0.94
1.42		1.129
1.25		1.027
0.85		0.91
2.96		0.974
1.4		1.456
0.6		0.502
3.97	0.951
0.85		1.072
1.24		1.009
0.78		1.059
0.61		1.046
0.64		0.941
0.67		0.859
1		1.541
1.59		1.095
0.59		1.277
1.18		0.945
0.59		1.461
1.26		1.399
0.72		1.415
1.66		1.49
0.9		1.205
1.12		1.231
1.16		0.99
0.56		1.452
0.74		1.168
0.95		0.877
1.23		1.199
0.69		1.288
0.67		0.914
0.6		1.003
47.49	0.753
49.9	0.506
35.91	0.932
49.6	0.469
26.76	0.824
50.62	1.077
50.67	0.894
26.18	0.653
45.24	0.225
49.9	1.063
49.94	0.393
48.59	0.994
49.78	0.972
0.75		0.784
0.71		0.787
0.96		1.072
1.09		0.809
0.65		0.931
1.18		0.783
0.95		0.823
0.79		0.787
1.08		0.994
0.84		0.927
0.6		0.993
0.55		1.129
0.79		1.072
1.23		0.96
1.35		0.927
0.98		1.066
0.97		1.301
0.79		0.927
0.69		1.175
0.64		0.806
0.65		0.983
0.71		0.963
0.64		0.765
0.9		1.114
1.88		0.801
0.64		0.848
0.65		0.958
1.29		1.266
0.86		0.827
0.69		0.982
1.5		0.905
1.22		1.076
0.58		1.19
1.19		0.868
0.72		1.229
0.7		0.9
0.86		0.87
2.28		1.011
0.75		0.726
0.69		0.921
0.59		0.92
1.05		0.97
51.77	0.645
48.49	0.4
29.91	0.578
51.86	0.877
31.78	0.321
52	1.08
45.68	0.309
49.46	0.859
50.06	0.304
49.95	0.453
47.58	0.786
46.76	0.702
51.91	0.37
50.11	0.396
0.79		1.041
0.79		1.121
1.05		1.254
1.37		1.187
0.92		1.058
1.59		0.991
0.56		1.233
1.47		1.353
0.76		1.106
1.18		0.966
1.45		1.022
1.4		0.96
0.67		1.081
0.65		1.001
0.56		1.058
0.53		1.027
0.57		1.093
0.84		1.106
1.29		0.923
1.36		0.942
1.69		0.999
1.47		1.566
0.96		0.937
0.79		1.335
0.66		0.869
1.5		0.958
1.02		0.997
1.39		0.897
0.64		0.688
1.06		1.096
0.83		0.93
1.21		0.909
0.95		0.685
1.74		0.868
0.66		1.131
1.52		1.007
1.08		1.168
0.96		1.168
0.56		0.872
0.52		0.745
0.85		0.997
0.66		0.961
0.96		0.931
1.53		1.351
0.74		0.888
1.58		0.807
48.89	0.831
21.84	0.372
40.36	0.669
24.46	0.263
16.75	1.141
17.78	0.365
11.28	0.966
44.69	0.394
47.65	0.759
15.12	0.906
49.23	0.681
37.24	0.303
11.68	1.041
5.56	0.923
0.6		0.832
0.8		0.916
0.98		1.014
0.58		1.351
0.56		0.966
0.84		1.045
1.49		0.999
1.02		1.077
1.33		1.008
0.69		1.01
0.7		1.055
0.85		1.038
0.88		1.04
0.84		0.937
0.57		1.16
0.53		1.126
0.56		1.161
0.7		0.996
5.54	0.868
0.69		0.845
0.66		0.818
0.56		1.217
0.67		1.217
0.54		0.926
0.9		0.832
0.92		0.973
0.56		0.957
1.08		1.059
0.59		0.77
0.55		0.86
0.67		1.04
0.68		0.664
0.54		0.911
0.63		0.964
49.68	0.43
50.38	0.537
23.87	1.149
50.4	0.784
51.34	0.628
51.93	0.768
49.98	0.934
43.39	0.837
48.89	0.358
46.08	0.305
54.99	0.362
50.73	0.454
51.03	0.348
47.51	0.926
51.24	0.342
35.32	0.817
53.8	0.9
0.92		1.09
0.69		0.753
2.5		1.22
1.11		0.968
1.18		1.234
0.89		1.382
1.05		1.332
0.75		1.126
0.63		1.095
0.74		0.924
1.5		1.12
1.25		0.798
1.01		0.917
0.65		1.068
1.55		1.148
1.41		1.087
1.16		1.157
1.1		1.105
0.87		0.957
0.93		0.949
0.89		1.006
0.92		0.355
0.82		1.111
1.31		1.506
0.94		0.993
0.83		1.062
0.55		0.899
1.69		0.981
25.58			5.261
25.77			0.962
19.66			4.541
29.46			1.366
12.46			1.91
13.29			1.926
0.64				1.064
0.59				1.053
0.58				1.036
0.64				1.185
0.54				0.531
0.61				0.838
0.65				0.933
0.67				1.05
1.88				1.085
0.79				1.016
0.79				1.123
0.66				0.849
1.4				0.956
0.57				0.955
0.56				1.047
0.63				0.85
0.64				1.112
0.6				1.017
0.59				1.094
0.54				1.098
0.59				0.961
0.57				1.051
0.56				1.004
0.55				1.194
0.6				0.973
0.58				1.052
0.55				1.261
0.57				1.115
0.61				0.977
0.71				1.175
0.6				1.005
0.66				0.988
0.61				1.194
0.52				1.014
0.54				0.766
0.55				1.001
0.66				1.077
0.59				1.099
0.61				1.038
0.77				1.174
7.44			3.255
6.89			3.736
0.54				1.069
0.56				0.94
0.62				1.179
0.57				1.071
0.57				0.985
0.54				0.906
0.59				0.986
0.59				1.022
0.58				1.012
0.72				0.982
0.63				0.834
29.98			5.726
27.96			1.769
29.7			1.9
19.16			0.974
20.61			0.922
6.99			5.497
7.82			3.632
6.4			1.102
0.6				1.03
0.56				1.073
0.63				1.187
2.64				1.135
0.59				1.088
0.6				1.355
0.89				0.935
0.55				1.55
0.58				1.245
0.55				1.148
0.56				1.261
0.63				0.898
1.16				1.339
0.52				0.909
0.58				1.06
0.56				1.135
0.61				0.856
0.61				1.084
0.55				1.009
0.65				1.301
0.64				1.032
0.64				1.15
0.54				0.968
0.67				0.893
0.61				0.993
0.67				0.965
0.58				1.038
0.56				1.044
0.54				0.981
0.81				1.159
0.69				0.711
0.54				1.24
0.71				0.984
0.63				0.334
0.7				1.017
20.77			1.372
19.41			4.159
26.84			1.13
32.44			2.499
26.22			4.131
35.97			1.875
17.45			1.181
27.51			4.362
18.62			3.155
11.75			4.636
0.76				0.893
1.1				1.009
1.93				1.046
0.59				1.306
0.65				1.147
0.57				1.013
0.76				1.261
0.52				1.196
0.75				1.068
0.7				1.031
0.62				1.003
0.54				1.219
0.72				1.071
0.55				0.999
4.85			1.068
0.74				0.971
0.7				0.962
0.54				1.128
0.58				1.253
0.56				1.141
0.76				1.158
0.68				1.098
0.61				1.031
0.55				1.404
0.53				0.967
0.55				0.809
1.3				1.134
0.58				1.119
0.6				1.161
0.63				1.301
0.71				1.087
0.72				0.449
0.68				1.204
0.94				1.711
0.58				1.196
0.71				1.45
0.65				0.979
16.1			3.409
14.41			3.62
31.72			0.955
25.74			1.143
26.21			1.83
30.09			4.978
31.48			2.019
21.97			2.366
18.37			1.79
11.31			5.576
22.45			0.726
25.97			0.82
8.47			1.504
19.34			4.924
0.57				0.998
0.61				0.971
0.58				0.958
0.62				0.975
0.54				0.834
2.51				0.787
0.63				1.104
0.56				0.825
0.63				1.146
0.69				0.991
0.8				1.022
0.58				1.067
0.71				1.178
0.74				1.088
0.83				1.212
0.7				1.003
0.65				1.023
0.79				0.967
0.64				0.974
0.62				0.948
0.77				1.196
0.58				0.98
4.37			0.964
0.55				0.927
0.65				1.045
0.56				0.966
0.56				0.932
0.6				0.941
2.24				0.775
0.59				0.906
0.66				0.926
0.69				0.865
0.7				0.932
0.57				1.045
0.54				1.31
0.56				1.145
0.55				1.208
0.69				1.217
0.57				1.148
24.65			0.899
30.66			0.831
21.94			4.686
33.55			1.16
17.02			4.173
18.29			0.766
25.05			0.834
19.02			4.256
15.77			1.097
10.62			6.7
11.5			3.104
6.48			0.573
10.26			0.966
6.51			5.884
7.24			0.763
0.56				0.962
0.59				1.177
0.61				0.88
[truncated: 485 more rows]
