# Supplementary material for: The switch-like expression of heme-regulated kinase 1 mediates neuronal proteostasis following proteasome inhibition
Source: eLife. 2020 Apr 24;9:e52714. doi: 10.7554/eLife.52714 (PMC7224698; doi:10.7554/eLife.52714)
Supplement: Figure 6—source data 1. [file elife-52714-fig6-data1.xlsx]

## Sheet: 6A
eIF2a phosphorylated "in vitro"
	Experiment 1	Experiment 2	Experiment 3	Experiment 4
Control	22030844	9569317	12308681	13534217
Hemin 100	16606723	7829004	10417610	11270803
Hemin 200	13194602	8108075	9540388
All experiments normalised			pValues
Hemin			Control vs Hemin 100
picomolar	1		< 0,0001
100	0.812764		****
200	0.740436		Control vs Hemin 200
			0.0084
			**

## Sheet: 6B
			Arbitrary Units
		Purified HRI (ng)	Experiment 1	Experiment 2	Experiment 3	All experiments	St. Dev	/100000	/10000
	Hippocampus	6.66667	19657815	19756401	21461250	20291822	1.01395e+06	202.918	10.1395
		3.33333	11480309	15372401	14845815	1.38995e+07	2.11157e+06	138.995	21.1157
		1	6231317	7769409	7514702	7.17181e+06	824387	71.7181	8.24387
		0.5	4388690	5116095		4.75239e+06	514353	47.5239	5.14353
	Blood	6.66667	8982116	13567986	14730714	1.24269e+07	3.03942e+06	124.269	30.3942
		3.33333	6608510	10800451	9839037	9082666	2.19594e+06	90.8267	21.9594
		1	3311690	6223146	4833560	4.78947e+06	1.45623e+06	47.8947	14.5623
		0.5	3226891	5739569		4483230	1.77673e+06	44.8323	17.7673
	t-Test	pValues
	Purified HRI (ng)	Hp vs Blood
	6.66667	0.0154	*
	3.33333	0.0423	*
	1	0.6985	ns
	0.5	0.6985	ns

## Sheet: 6C
Normalised Protein Synthesis (AU)
	Experiment 1	Experiment 2	Experiment 3
	2 biological replicates	2 biological replicates	2 biological replicates
Control	1	1	1
PI	0.160381	0.135606	0.132108
PI+Hemin	0.561858	0.741642	0.80951
	All experiments Normalised
Control	1
PI	0.142698
PI+Hemin	0.704337
	t-Test
	PI vs PI+Hemin
	P value	0.0017
	P value summary	**
	Control vs PI
	P value	< 0,0001
	P value summary	****

## Sheet: 6E
HA positiv	HA negativ
	1.30461
	1.19667
	1.64336
	1.01298
0.131697
	1.19921
	1.29446
	1.2454
	1.1846
	0.938401
	1.50641
	1.40327
	1.59167			Unpaired t test
	1.44092			P value	< 0,0001
0.533625				P value summary	****
	1.34967
	1.73064
	0.112967
0.741123
	0.962103
	1.63915
	0.692028
	1.34143
	1.67115
	1.49262
	1.43534
0.36212
	1.71208
0.147475
	1.36957
	0.339678
	1.72848
	1.45982
0.864793
	1.18543
	1.72002
	1.34758
	1.33164
	1.27499
0.967143
	1.4147
	1.44548
	1.55335
0.514532
	1.59456
	1.50137
	1.04089
	1.36916
	1.80119
	1.41715
	1.32686
	0.823172
	0.715677
0.705786
0.7419
	1.23822
	1.50275
	1.12653
	1.53756
	0.101798
0.429082
	1.22957
	1.28816
	1.25224
	1.06986
	1.3487
	1.33379
	1.33474
0.179688
0.285163
	1.23805
	1.53861
	1.45813
	1.34428
	1.34777
	1.07743
	0.518572
	1.14595
	1.5746
	0.110274
	1.82562
	1.59316
0.541307
	1.77067
	1.15999
	1.82608
	1.6041
0.572656
	1.10911
	1.38318
	1.29049
	1.35878
	0.990949
	1.47487
	1.22101
	1.48452
0.921518
	1.77459
0.142262
0.188647
	1.83384
	1.48604
0.112467
	1.63133
	1.40959
	1.18353
	0.84677
	1.46902
0.55869
	0.430808
	0.72184
	1.23447
1.07252
	0.926179
	1.14602
0.0925799
	1.25322
0.124412
0.235429
0.0723135
	1.10031
	1.24533
	1.0132
	1.27319
	1.22667
	1.05372
	1.27623
	1.40168
	0.955387
1.30515
0.383577
0.470478
	1.16912
	0.851121
	1.40805
	1.23068
	1.00493
	1.05605
	1.24034
0.323469
0.679201
	1.03468
	1.05308
	1.0716
0.0874701
	1.09219
	1.24882
0.133285
	0.933291
	1.08815
	1.09392
	0.894157
	1.24544
	1.43268
	1.43268
	1.74464
	1.49688
	1.08065
	1.18869
	0.849705
	1.92175
0.479972
0.147285
	1.38143
	1.18175
	1.34917
0.346946
	1.53198
	1.85286
0.336485
	1.2479
	1.38046
	1.09649
	0.454579
0.754967
	0.977656
	1.17847
	1.16575
	1.82645
	0.947723
	1.13551
	0.896625
	1.42455
	0.943269
	0.950295
	1.19439
0.172265
0.107978
0.103196
	1.02654
0.0905429
	0.893034
	1.12323
	0.943804
	1.15287
	1.28602
	1.02135
	1.06176
	0.814558
0.0936329
	1.07203
	1.15771
	1.39761
	1.31172
	1.45968
0.397388
	1.40631
0.301459
	1.63404
1.17997
	1.28327
	1.43061
	1.40285
0.847219
	1.3071
	1.3365
0.10185
	1.22116
0.31299
0.0884887
0.294208
	1.26479
	0.812936
	1.0074
	0.88316
	0.945082
	0.848842
	0.770711
0.149167
	1.00519
	0.949553
	0.876721
0.259372
	1.01874
	1.33748
	0.618782
0.101833
	0.993124
	1.20792
	1.24487
	1.48092
	1.05168
	1.64957
	1.25355
	0.923814
	0.600984
	1.04493
0.158057
0.0943407
	0.541462
	0.597514
	0.933291
	0.863567
	0.809707
	0.795828
	0.867313
	1.20754
	0.755882
0.638099
0.226884
	0.809535
0.0937538
	0.883281
	0.765256
	0.945927
0.177081
	1.03516
0.0916823
	0.92554
	0.807947
	0.667497
0.42342
	0.942389
	1.06003
	1.12801
0.372978
	0.919377
	0.901493
	0.810001
	0.655603
	0.740622
	0.720718
	0.830077
	0.958926
	0.475329
	1.20328
	1.41091
0.365062
	1.53075
	1.29977
	1.25124
	0.953634
0.159092
0.327832
	1.51874
0.374448
	1.65481
	1.5319
	0.891208
	1.15811
	1.22038
0.634375
	1.19125
	1.50595
0.295269
0.180853
0.558945
	1.19605
	1.60151
1.10234
	1.43738
	0.894092
	1.61229
	1.81493
	1.59184
	1.19298
	1.1379
	1.48481
	0.746536
0.542349
	1.13944
	0.853218
	0.791553
	1.2154
0.55357
	1.17664
	1.14815
	1.25042
	1.09799
	1.35134
0.909089
0.296029
	1.11301
	1.57991
	1.31985
	1.17332
0.90062
0.592871
	1.62791
0.239582
	1.17552
	1.26372
	1.22287
	1.18941
	1.5447
	1.31159
	0.966559
0.50158
	0.705295
	1.55492
0.398359
	1.34544
	1.25181
	1.50597
	1.18734
	0.159249
	1.1144
	1.13213
	1.33364
	1.41355
0.111191
	1.16629
	1.36861
0.377883
	1.57983
	1.13105
	1.16529
0.331398
	0.862945
0.153848
	1.41324
0.319049
	1.21949
	0.836229
	1.4528
	1.53979
	1.24133
0.167219
	1.37527
1.2628
	1.09878
	1.16236
0.198104
	0.941547
0.656686
	1.01561
	0.965117
	1.24686
	1.3694
	0.925685
0.197449
0.753196
	1.37622
0.207674
	1.29835
0.188351
	1.39108
0.750154
	0.992725
	1.31773
	0.96475
0.405123
1.03507
	1.1891
	1.26594
	1.25491
	1.46706
0.433439
	1.39586
	1.55518
	1.22413
	1.54123
	1.47823
	1.27446
	0.812422
	0.408794
	1.27035
	1.53743
	1.07426
0.482126
	1.01685
	1.19133
	1.6093
	1.06726
0.722704
	1.50099
	1.04278
	1.12809
	0.880537
	0.725745
	1.15609
	1.14421
	1.25328
	1.29376
	1.25467
	1.26815
0.692763
0.161897
	1.07104
	1.25792
	1.19036
	1.19088
	0.719322
	1.13302
	0.89092
0.515895
0.153376
	1.72432
	1.15774
	1.38718
0.193044
	1.5006
	1.70143
	1.32179
	1.31851
	1.16524
	0.596804
	0.818269
	1.21752
	1.20952
	0.286827
0.313255
	0.994062
0.43627
	1.0869
	1.16936
	0.90492
	1.03436
	1.01994
	1.2053
0.121049
	0.925082
	0.999305
	0.905602
	1.06228
	1.0056
0.78235
	0.819396
0.527038
0.12063
0.475467
	1.69
0.772256
	1.14316
	0.803194
	1.29028
	0.954027
	0.85036
	1.0369
	1.36591
	0.946397
	0.995268
	0.995923
	0.624438
	1.06105
	0.954001
0.764653
	1.20832
0.449301
	1.38049
	1.25724
	0.990916
	1.52598
1.24274
	1.04907
	1.59737
	0.991073
	1.34502
	1.20832
	1.40616
0.705846
	0.728472
0.181666
0.214727
	1.46822
	1.02508
	0.987822
	1.17345
	1.51578
	1.12287
	1.05796
0.134001
0.274871
	1.24846
	1.40642
0.311839
0.772623
	1.18635
0.349462
	1.46651
	0.978724
	1.0348
	1.31468
0.15335
	1.28797
	1.0712
1.08732
0.183396
0.588336
	0.915407
	1.30724
0.870286
0.191183
	1.09977
	1.06522
	1.13378
	0.971147
	0.907332
	0.942701
	0.773121
	0.771496
0.758037
	1.42428
	1.33251
0.452347
0.360201
	1.35717
	1.61089
	1.36473
0.606079
	1.05105
0.721597
	1.27712
	1.3299
	1.53573
	0.769742
	1.14581
	0.650583
	1.11016
	1.76081
	1.01771
	1.13952
0.136744
	1.19416
	1.32921
	1.37698
	1.19418
0.514605
	1.59388
	1.40474
	2.1518
0.130341
	1.36531
	1.05445
0.930605
0.403343
	1.05073
	1.25948
	1.20404
	1.19073
	1.50637
0.222487
	1.35463
	0.677727
	1.02406
	1.32318
	1.1003
	1.05443
	1.01478
	0.949423
	1.04327
	0.999995
	1.15371
	1.25343
0.204472
	1.15673
	1.19209
	2.06641
0.338789
	1.18869
0.775398
0.122313
0.125412
	1.22394
	1.357
	1.11902
	1.77965
	1.65877
0.123751
0.439204
	1.16605
	1.40308
	1.50695
	1.2028
	1.10228
	1.48592
	1.41383
	1.99922
	1.23837
0.103533
	1.11996
0.0977462
	1.3509
	1.26915
	1.18369
	1.14951
	0.970219
	0.830619
	0.644722
	0.906953
	0.922316
	0.812604
0.0778647
	1.11988
	1.11467
	0.831907
	1.17583
	0.98898
	0.837358
	0.787421
	0.674703
0.0804595
	0.98534
	1.26775
0.269736
	1.37405
	0.686389
	0.763078
	1.48803
0.622693
	1.18005
	1.26607
	1.52927
	1.19002
	1.11887
	0.955602
	1.08434
	0.91526
	1.18382
	1.18307
	1.20818
	0.961128
	0.938315
	0.912422
	1.27165
	1.29764
	0.874993
	1.17217
0.690851
0.380157
0.221348
0.180035
0.179382
0.111691
	1.03965
1.6155
0.615973
	1.55438
	1.25045
	0.951476
	1.58666
	1.53204
1.17766
0.555507
	1.13734
	1.50146
	1.56375
	1.43647
	1.36658
	0.884308
	1.48428
	1.72801
	1.70976
	1.20473
	0.699046
0.386262
	0.212088
	1.05245
	0.0864707
	0.982204
0.464855
	1.0952
	0.990996
	0.874955
	1.32588
	1.42929
0.11339
	1.28985
	1.03179
0.175966
	1.2057
	1.10039
	1.78917
	1.35417
	1.71887
	1.60301
	1.75708
	1.46681
0.145985
0.490915
	1.31849
	1.07719
	1.29607
	1.40171
	1.2786
	1.69706
	1.25336
	1.15192
0.193308
	1.02271
	0.974606
	1.20409
0.122985
0.16217
0.280712
0.178971
	1.16562
	0.955919
0.484717
0.810159
	0.837489
	0.924706
	1.24113
	1.08118
1.33712
	1.26574
	1.05617
	0.927152
0.80846
	0.845367
	1.34108
0.209437
	1.26738
	1.43647
	1.85957
	1.37343
	1.63762
	1.41039
0.099501
0.125226
	1.19797
	0.977873
	1.15227
	0.104448
	0.911022
	0.159799
	1.30292
	1.26538
	1.30173
	0.959634
0.0876654
0.666395
	1.0325
	1.39419
	1.16377
	1.43384
	1.46754
0.47557
	1.45594
	1.34838
	1.21427
	1.17585
	1.48845
0.117068
0.614405
	1.20426
	1.29516
	1.31229
	0.79108
	1.25059
	0.0810756
	1.36468
	0.88526
	1.1426
	1.41921
	1.03345
	0.983847
	1.47314
	1.1909
	1.52168
	1.09384
	1.16842
	1.06507
	1.56239
	1.22627
	1.62194
0.818634
	1.22112
0.105157
	1.44504
	0.886735
	0.906953
0.142867
0.144099
0.0564337
	1.46237
	0.917183
0.0857799
0.188791
	1.28058
	1.4799
	1.06683
	1.23979
	1.23187
0.14212
	1.22636
	1.02137
	1.31272
0.320942
	1.18361
	1.1765
	1.17975
	1.2733
	0.39946
1.5844
	1.15948
	0.165381
	1.51621
0.0861906
	1.20742
	1.04454
	1.24658
	1.28593
	1.2461
	1.29529
	1.61957
1.23239
	1.45897
0.733227
0.196332
	0.898085
	1.15341
	1.52567
	1.4919
	1.00948
0.196594
0.107118
	1.44457
	1.096
	2.20259
0.197527
	1.94718
	1.42242
	1.25605
	1.17152
0.108574
	1.69381
	1.60118
	0.601729
	0.248808
	1.84426
1.06619
	1.27876
	1.32844
0.757944
	1.13836
0.175667
0.566428
	1.20687
	1.03565
	1.46369
	0.960941
	1.19985
	1.27221
	1.75456
0.165586
	1.07489
	1.1283
	1.58636
	1.48298
0.820893
	1.03029
	1.36651
	1.12253
	1.27604
	1.08402
	1.12836
0.36078
	1.26812
	1.33703
	1.09438
	1.34511
	1.36272
	1.02157
0.100976
0.329697
0.213974
0.114921
	1.33705
	0.998426
	1.37575
	1.07842
	0.977854
	1.44077
	0.347301
	1.05247
	0.951196
	0.977219
	1.06399
	1.16827
0.259001
0.366866
	1.07919
	1.32644
	0.937195
	1.08932
0.153191
0.137864
	1.03987
	1.30796
	1.0201
	1.06754
	1.20872
	1.37065
	1.47198
0.129538
	0.83747
	1.48292
0.0916791
	1.20394
	1.49953
	0.883207
	1.01784
0.118337
	1.06483
	1.10777
	1.31577
	1.31748
	1.11973
	1.22028
	1.06955
0.220358
	0.831925
	1.00306
	1.14092
	1.0364
	1.25664
	0.983044
	0.932248
0.0886735
0.259281
	0.993741
	1.2391
	1.07969
	1.186
	1.15854
	1.83741
0.2579
	1.0787
	1.24137
0.102488
	1.20553
	1.12625
	1.00188
	1.11936
	1.42949
	0.97412
	1.28089
	1.40121
	1.18128
	1.48115
0.197975
	0.925565
	1.05544
	1.10945
	1.36245
0.604473
	0.940518
	1.4925
	1.3158
0.109078
0.50682
0.109003
	1.28549
	1.18892
	1.38842
	1.18666
	0.0784434
	1.11423
	0.868067
	1.04306
	1.315
	1.23517
	0.871857
	1.14891
	1.25528
	1.2937
	0.376349
0.126066
	1.42169
	0.922335
	0.987151
	1.46351
	1.26628
0.165381
0.14395
	1.17992
	1.06748
	0.7894
	1.28782
	1.05473
	1.32269
0.237477
0.375528
	1.05755
	0.832243
	0.830283
	1.10078
0.197098
	1.51464
	1.1319
	0.940275
	1.38743
	1.26023
	1.23256
0.349019
	1.20058
	1.29342
0.34004
	1.02212
	1.25119
0.0956367
0.29083
0.198405
0.0842118
	1.02682
	0.959205
	0.95254
	0.815722
	1.18746
0.180371
	1.38463
	1.76718
	1.15029
	1.20527
	1.11368
	1.66303
	1.34035
0.155972
	1.25239
	1.16048
	1.24925
	1.00429
	1.4453
0.521325
	1.20833
	1.31857
	0.849212
0.394756
	0.928608
	1.2786
	1.47344
0.144921
0.553547
	1.19526
	1.37129
	1.37127
	1.26967
	1.56127
0.115388
	1.06541
	1.05941
0.109675
	1.30481
	1.07502
	1.38346
0.673228
	1.03451
	0.613639
	1.18038
	1.18823
	1.03276
	1.53506
	1.24234
	0.831104
