# Supplementary material for: The switch-like expression of heme-regulated kinase 1 mediates neuronal proteostasis following proteasome inhibition
Source: eLife journal article supplement (doi:10.7554/elife.52714), 2020-04-24

**Figure 4- figure supplement 1- source data**

**Figure 4- figure supplement 1A**

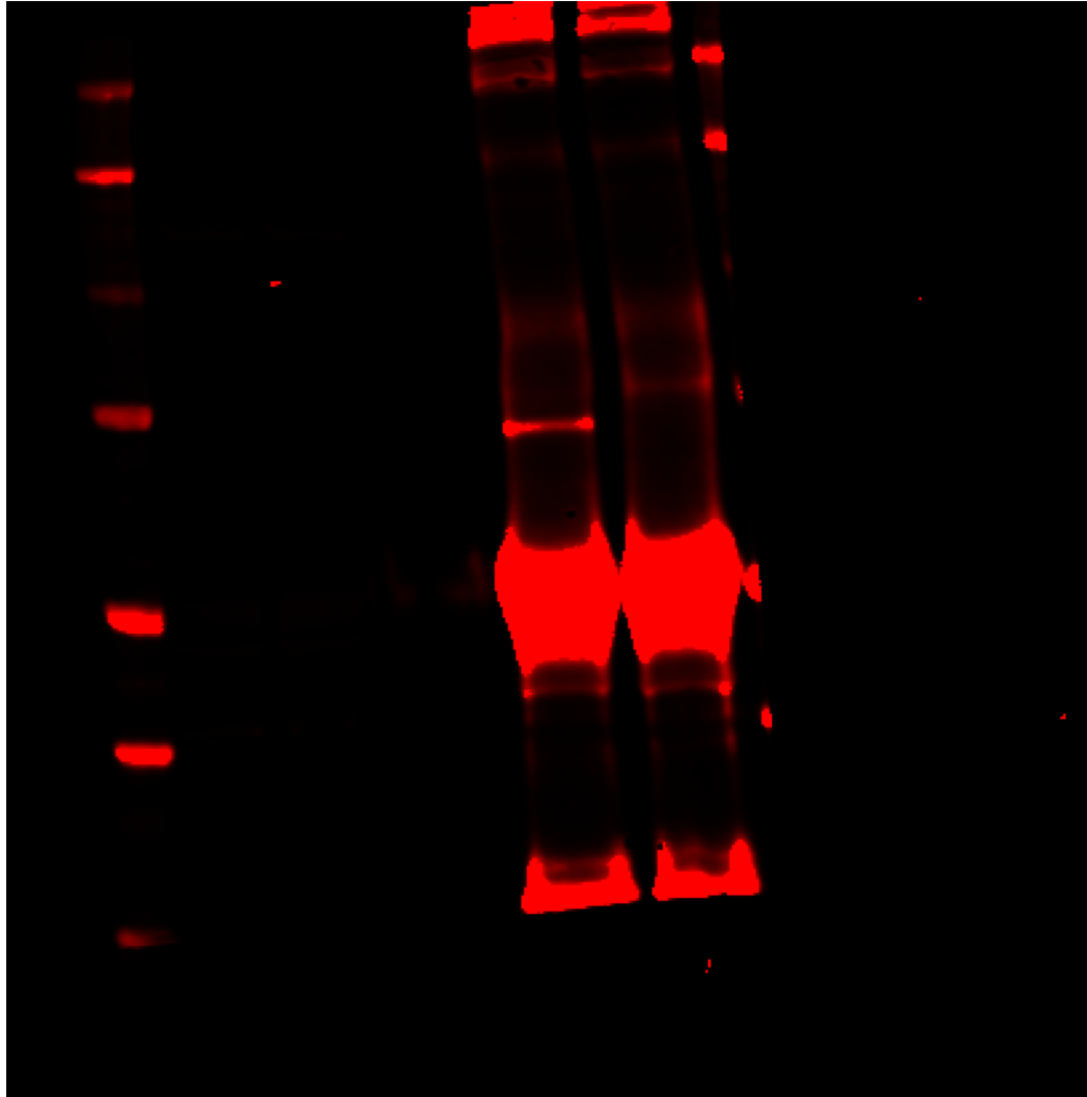

**Figure 4- figure supplement 1- source data**

**Figure 4- figure supplement 1B**

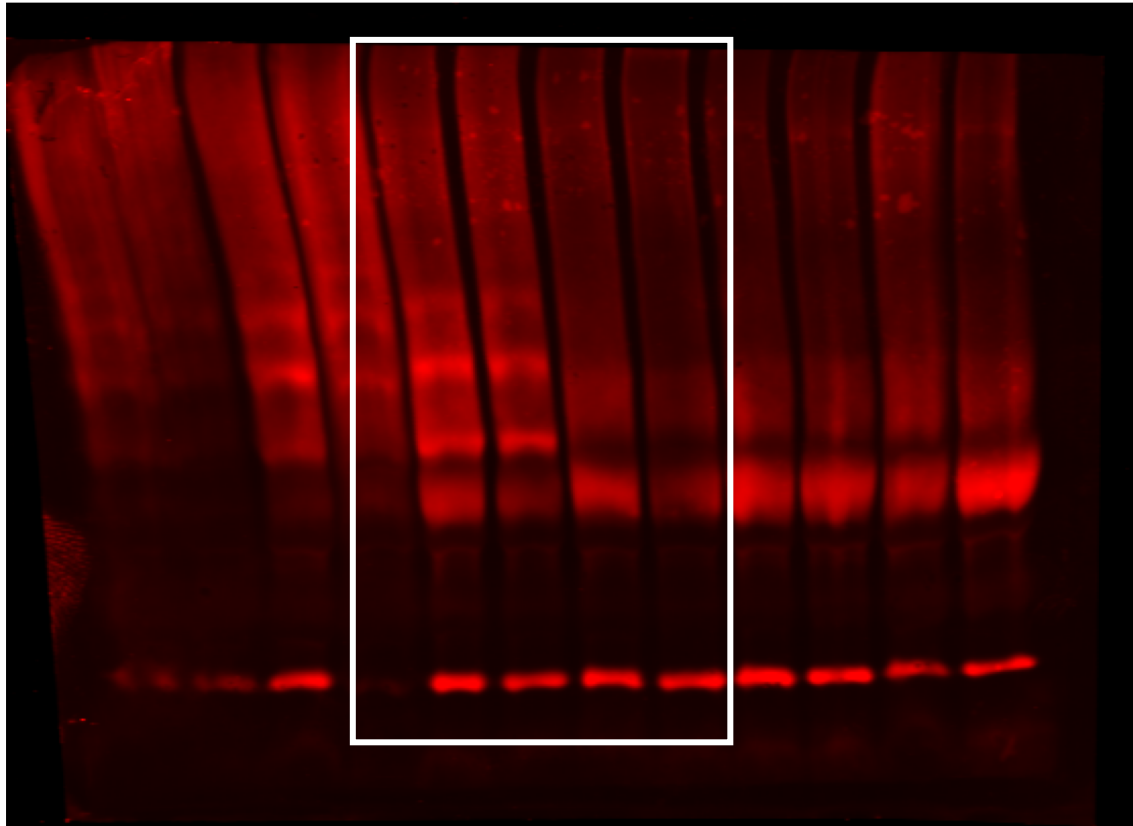

Figure 4- figure supplement 1- source data

Figure 4- figure supplement 1C

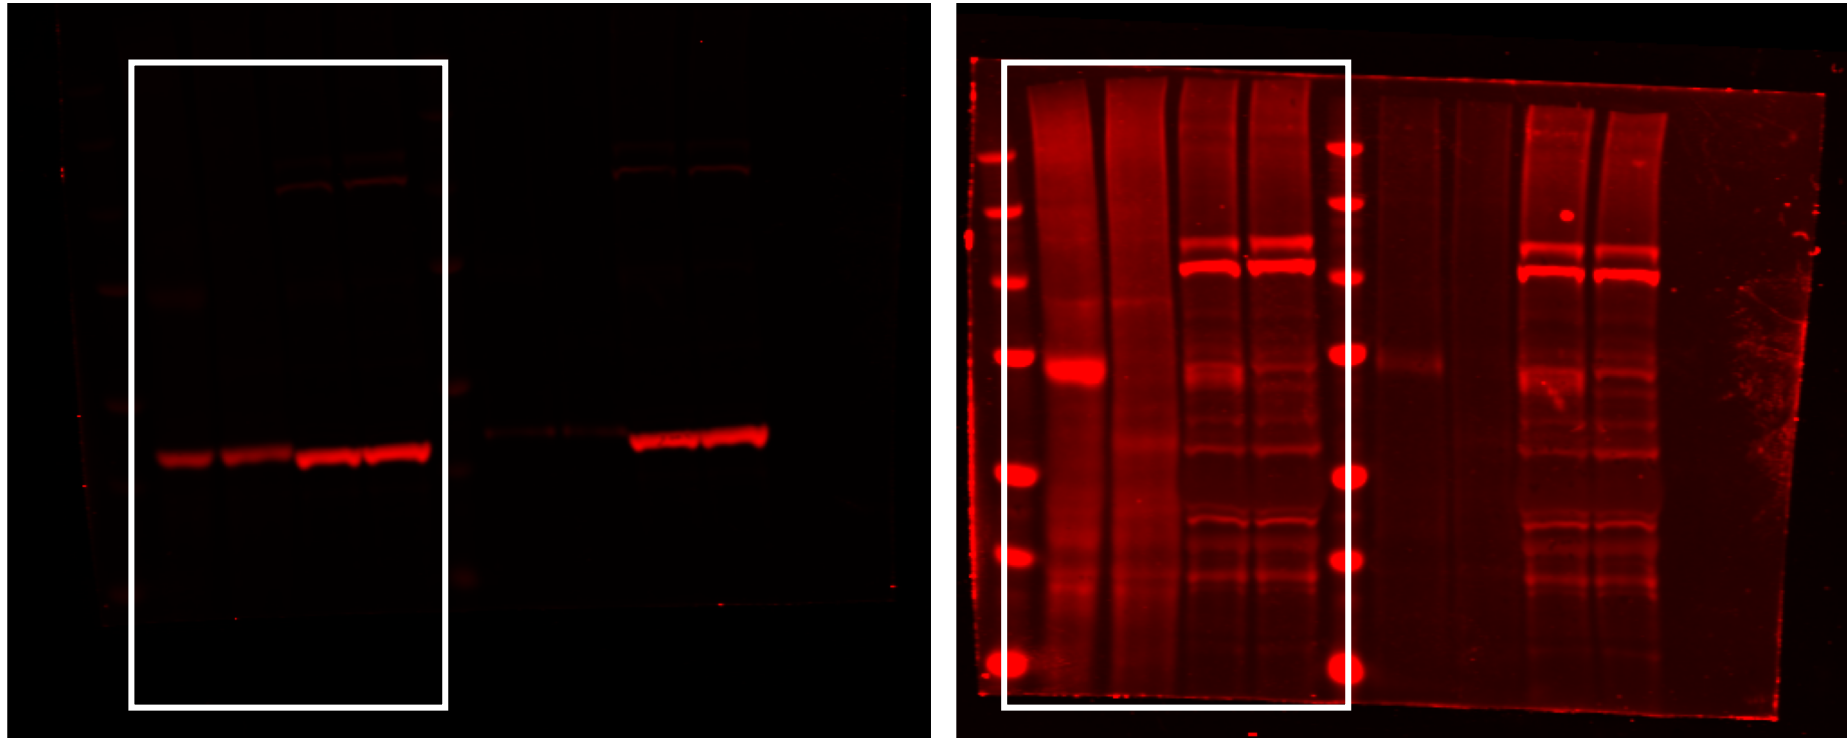

Figure 4- figure supplement 1- source data

Figure 4- figure supplement 1D

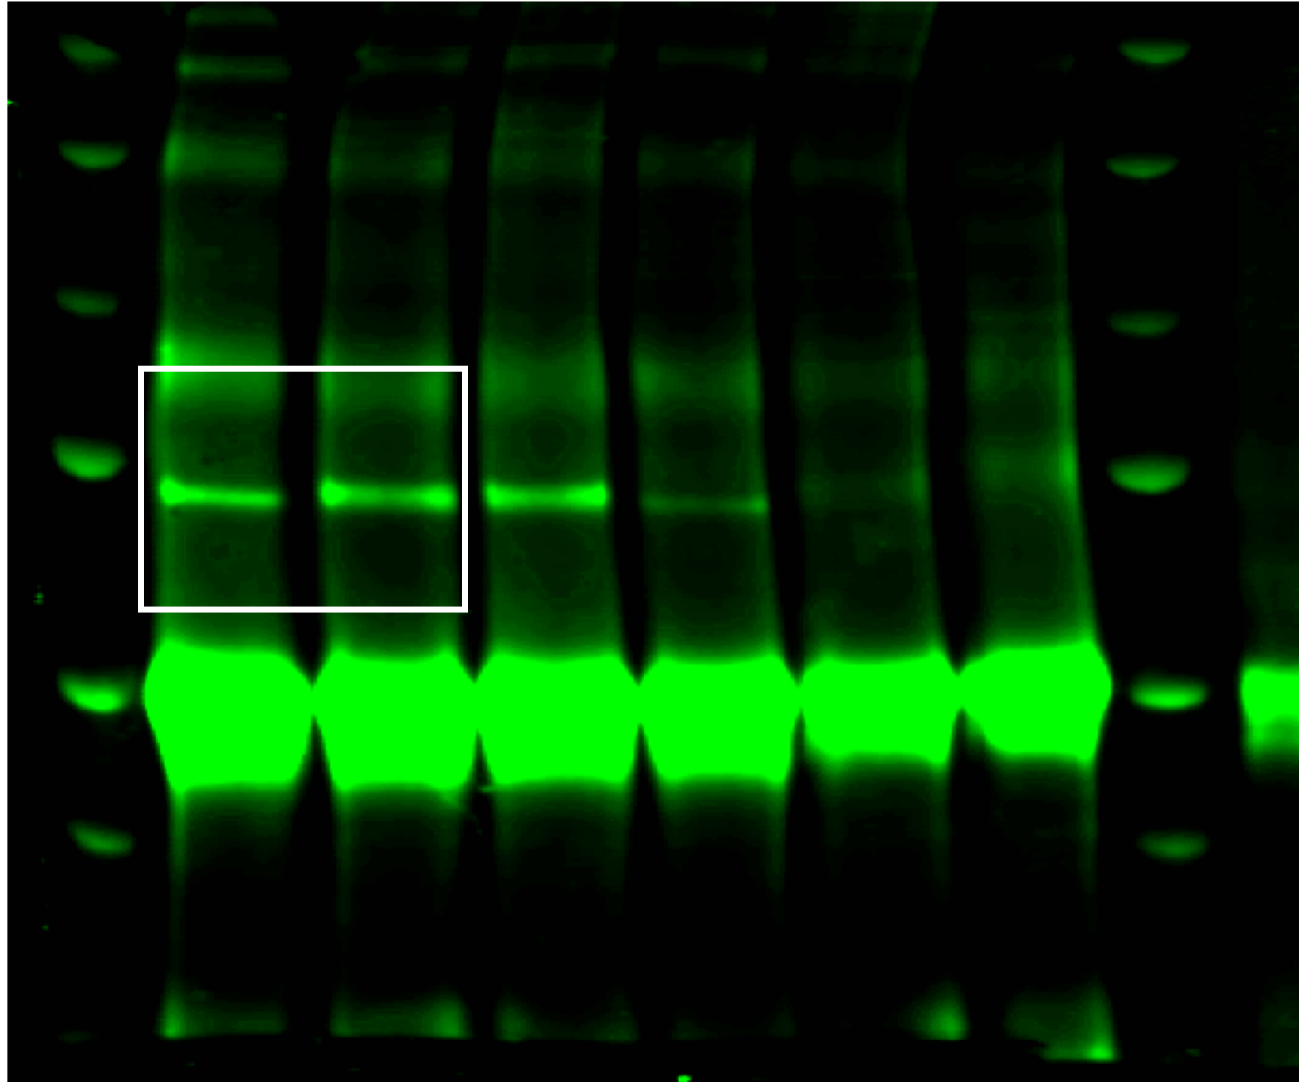

**Figure 4- figure supplement 1- source data**

**Figure 4- figure supplement 1D and F**

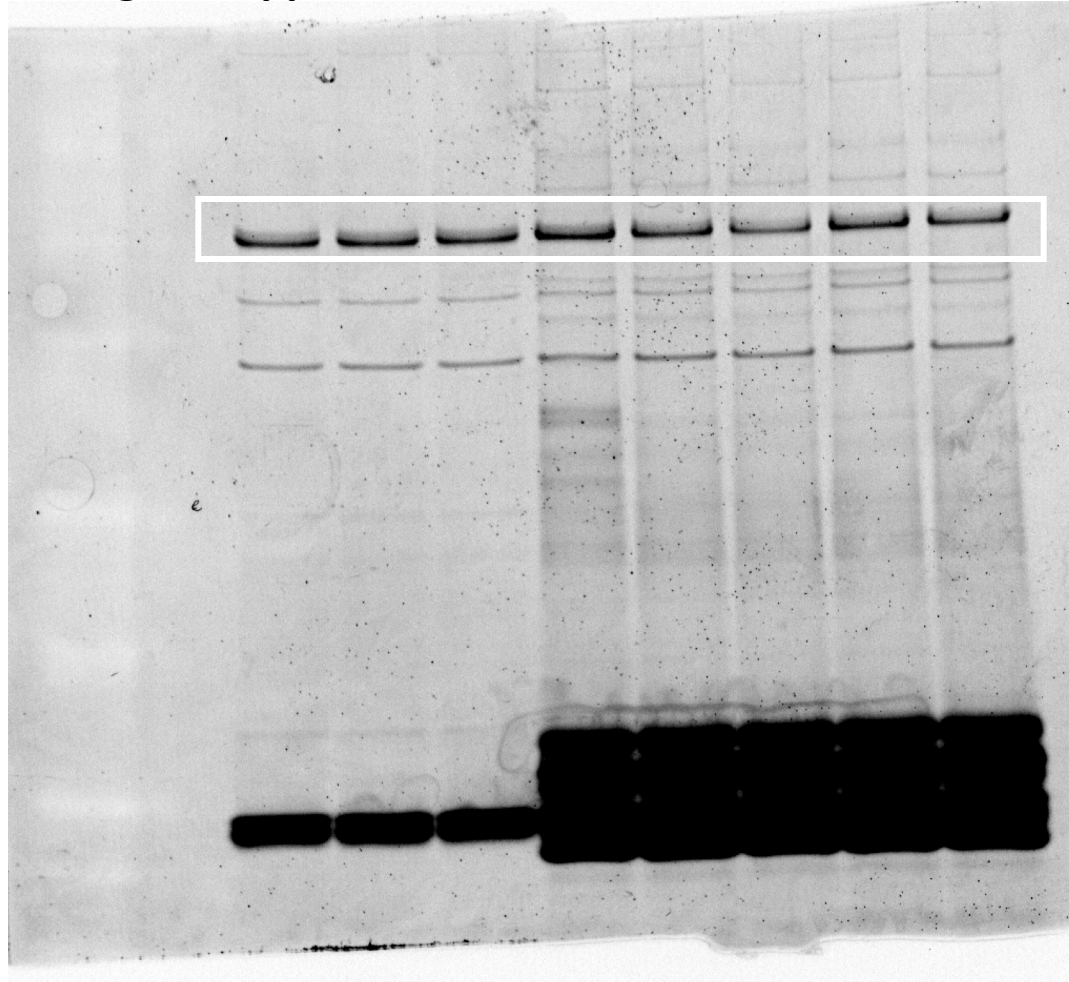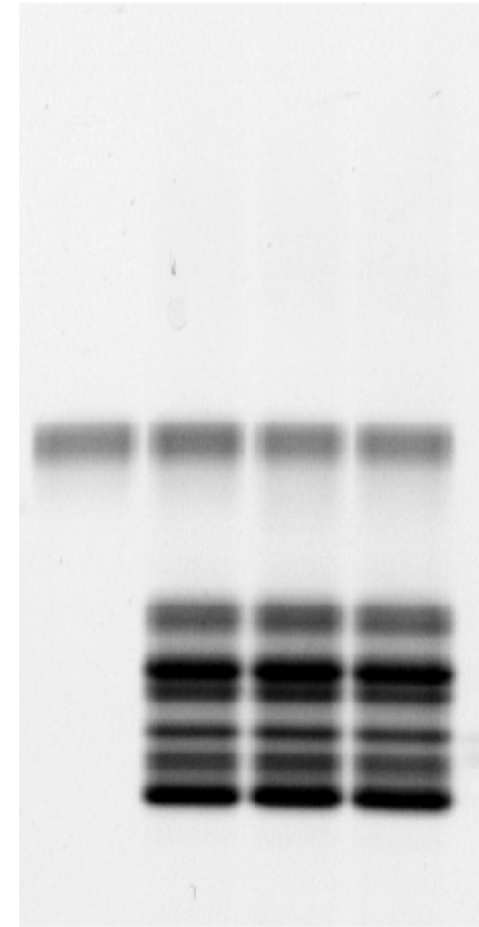

Supplement: supp [file elife-52714-supp-v1.zip]
