# Supplementary material for: The switch-like expression of heme-regulated kinase 1 mediates neuronal proteostasis following proteasome inhibition
Source: eLife journal article supplement (doi:10.7554/elife.52714), 2020-04-24

Figure 2-figure supplement 1-Source data

Figure 2-figure supplement 2C

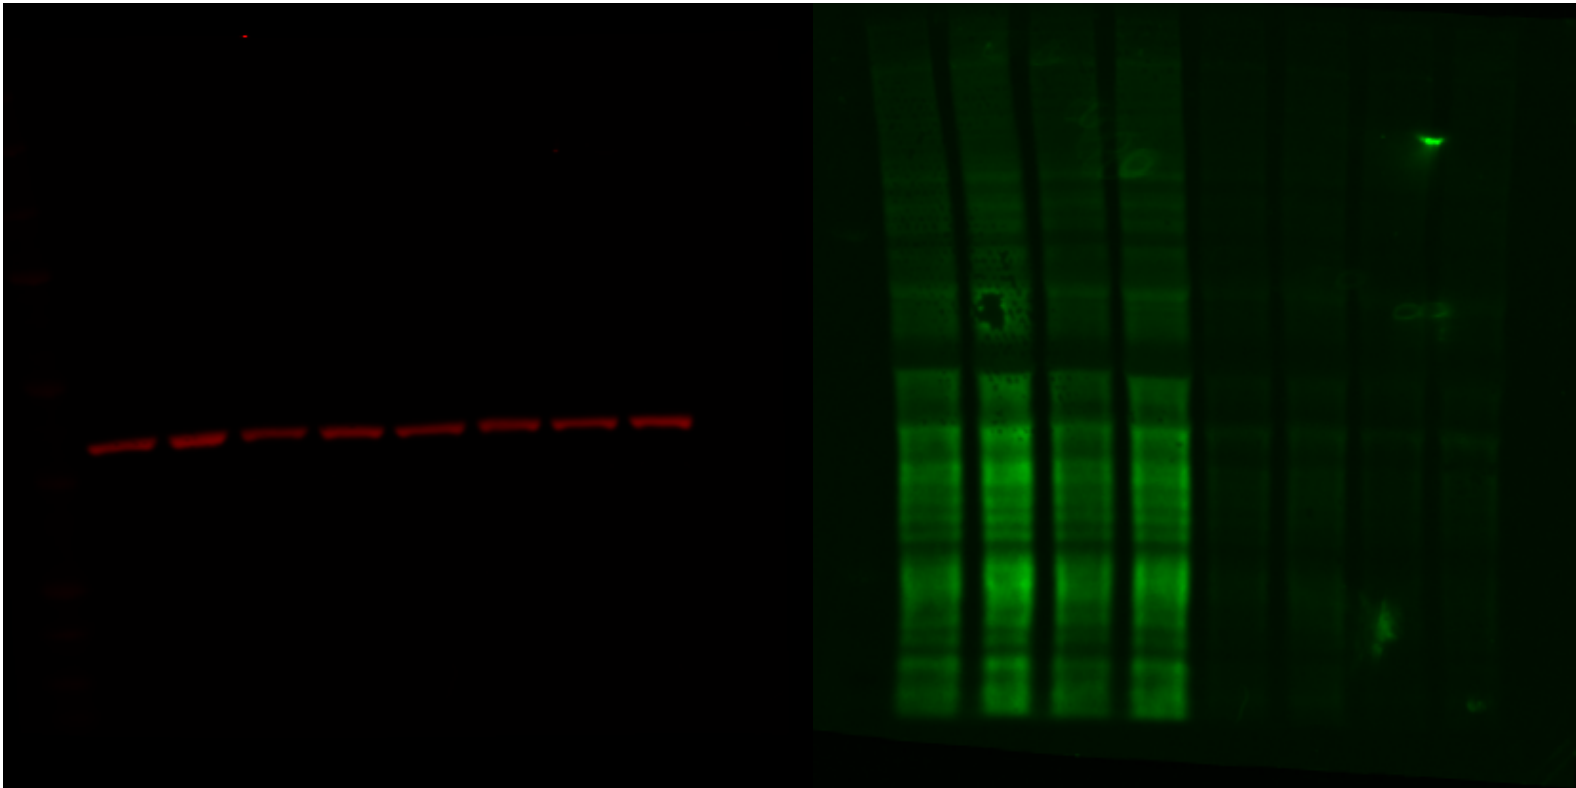

Figure 2-figure supplement 1-Source data

Figure 2-figure supplement 2C

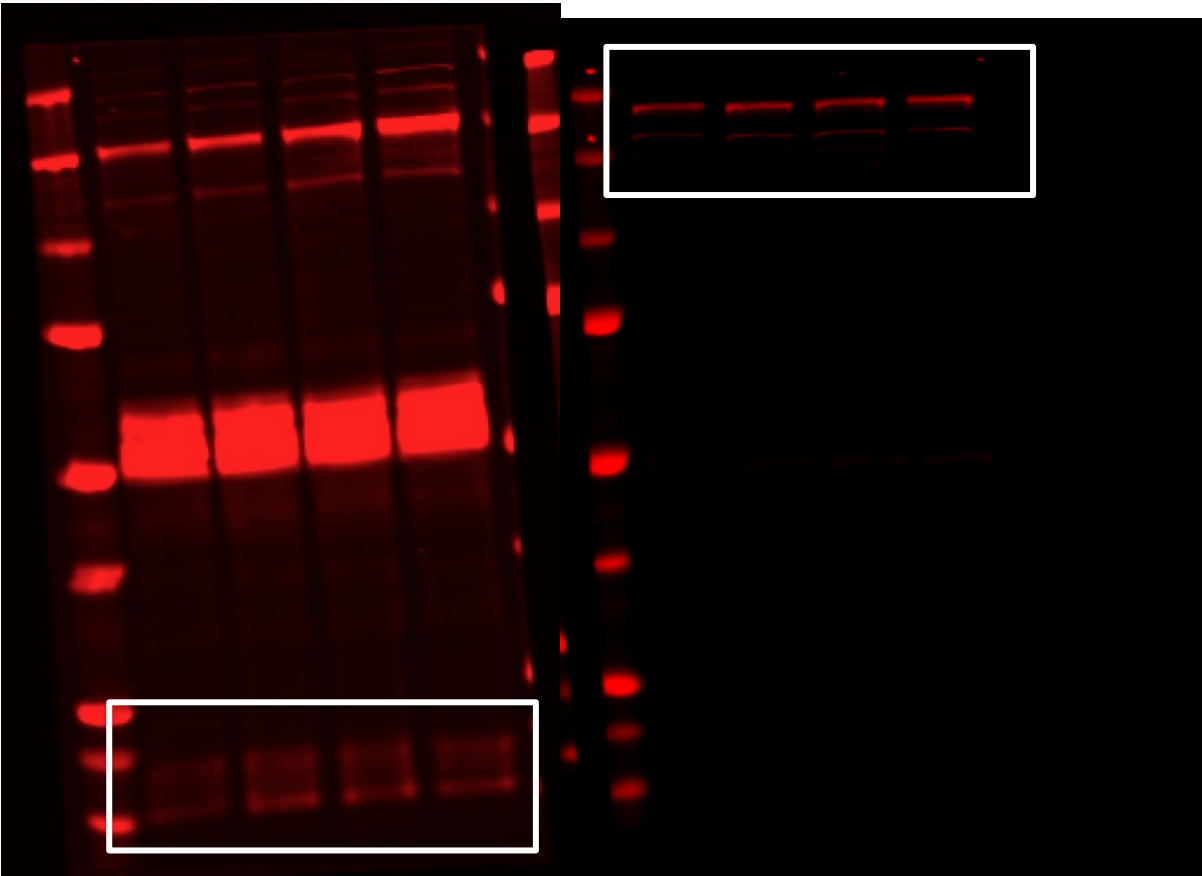

p4EBP1

pelf4G

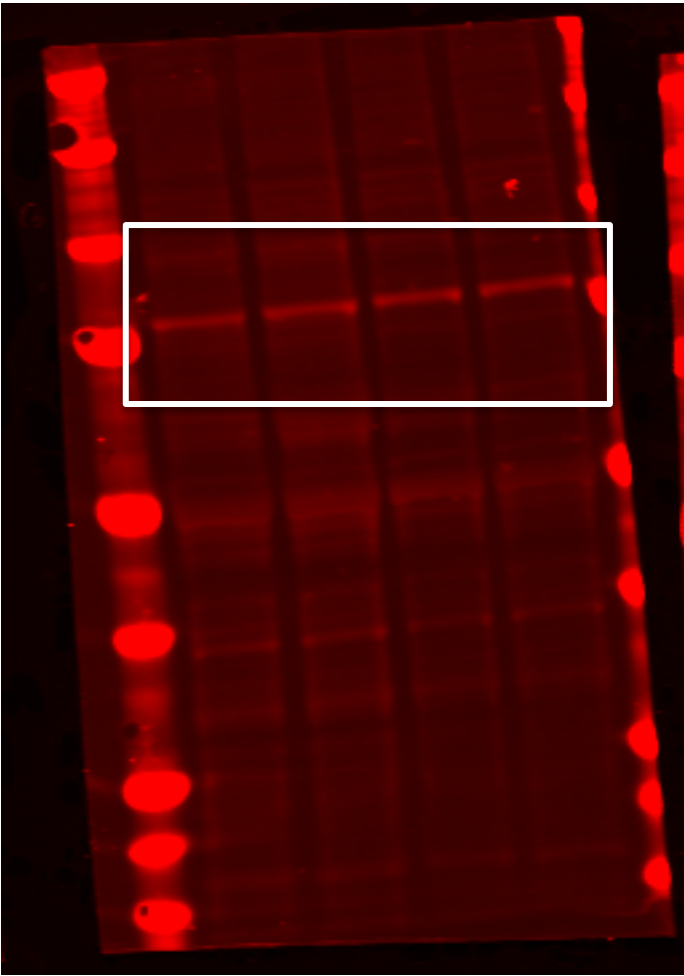

pelf4B

Figure 2-figure supplement 1-Source data

Figure 2-figure supplement 2C

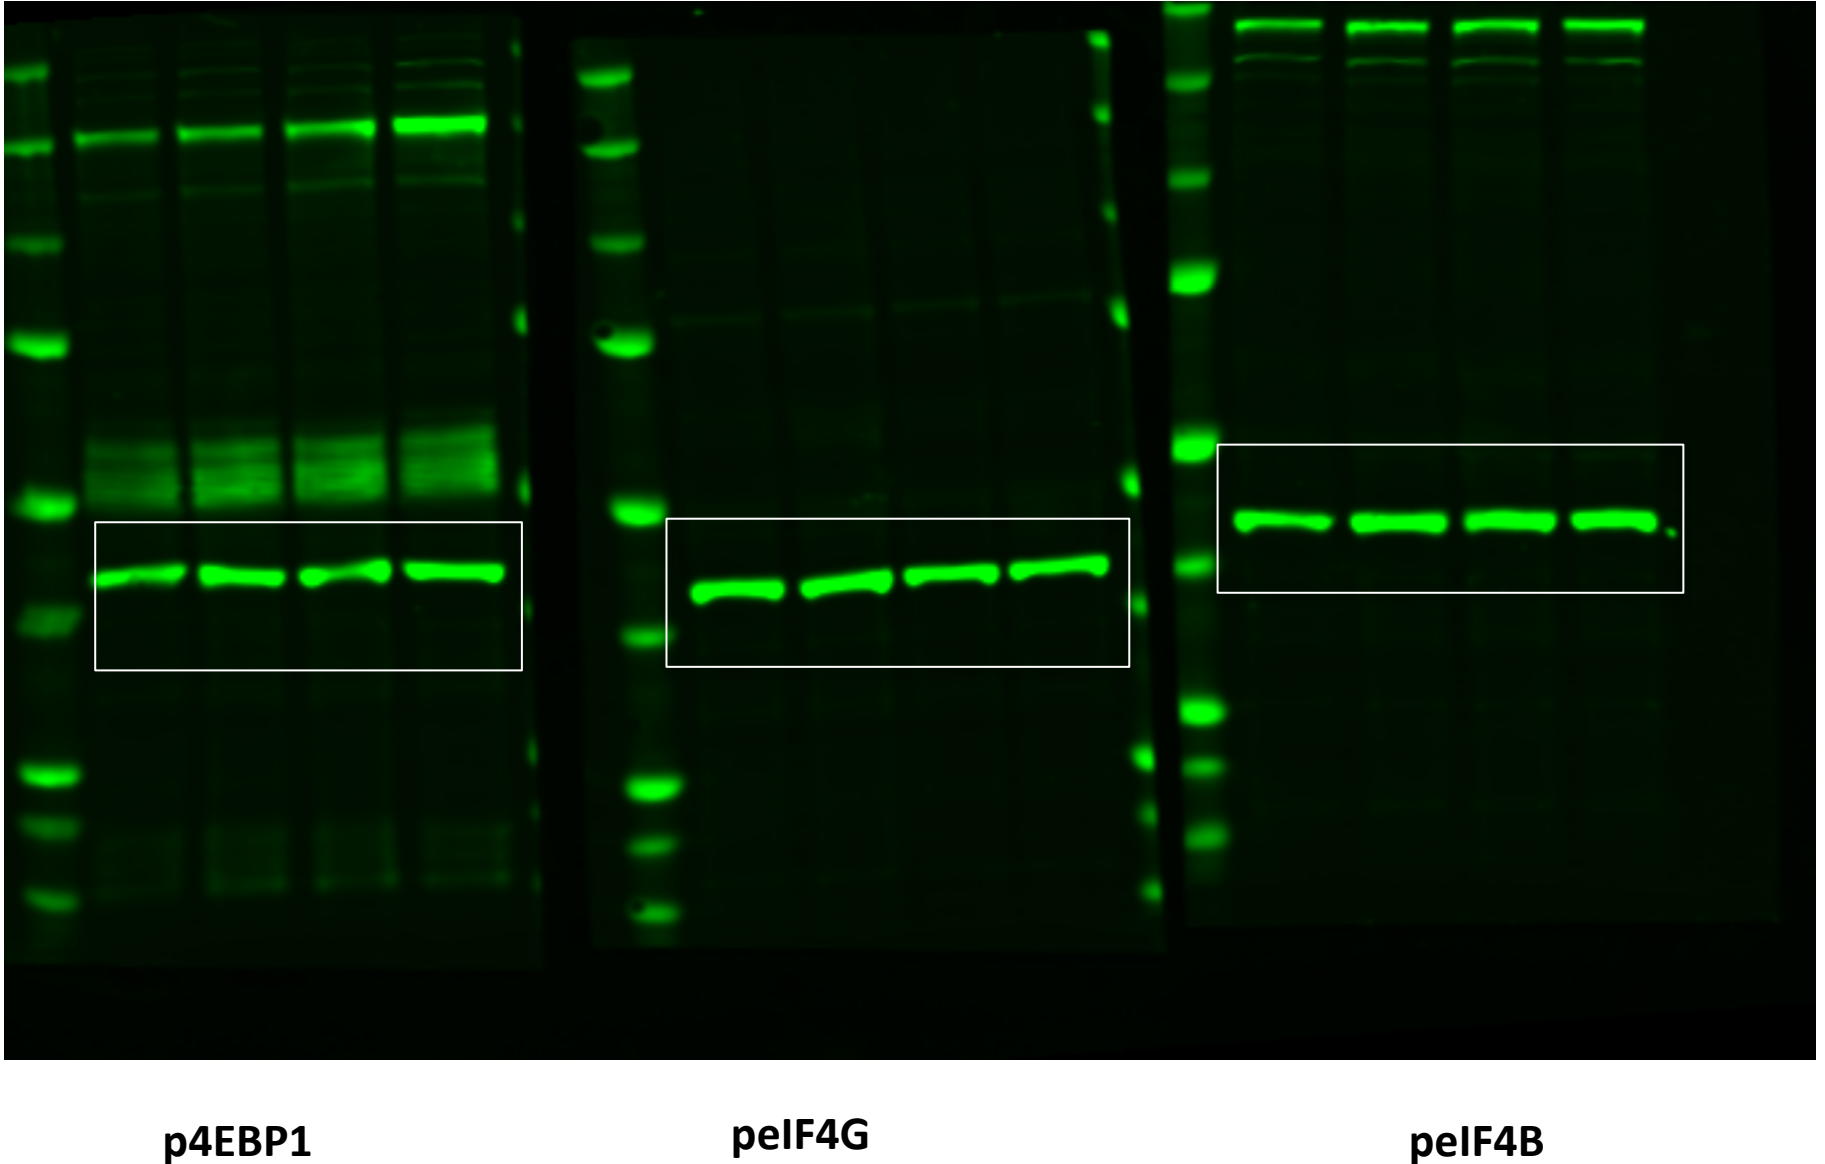

Supplement: supp [file elife-52714-supp-v1.zip]
