# Supplementary material for: The switch-like expression of heme-regulated kinase 1 mediates neuronal proteostasis following proteasome inhibition
Source: eLife journal article supplement (doi:10.7554/elife.52714), 2020-04-24

Figure 5- figure supplement 2- source data

Figure 5-figure supplement 2I

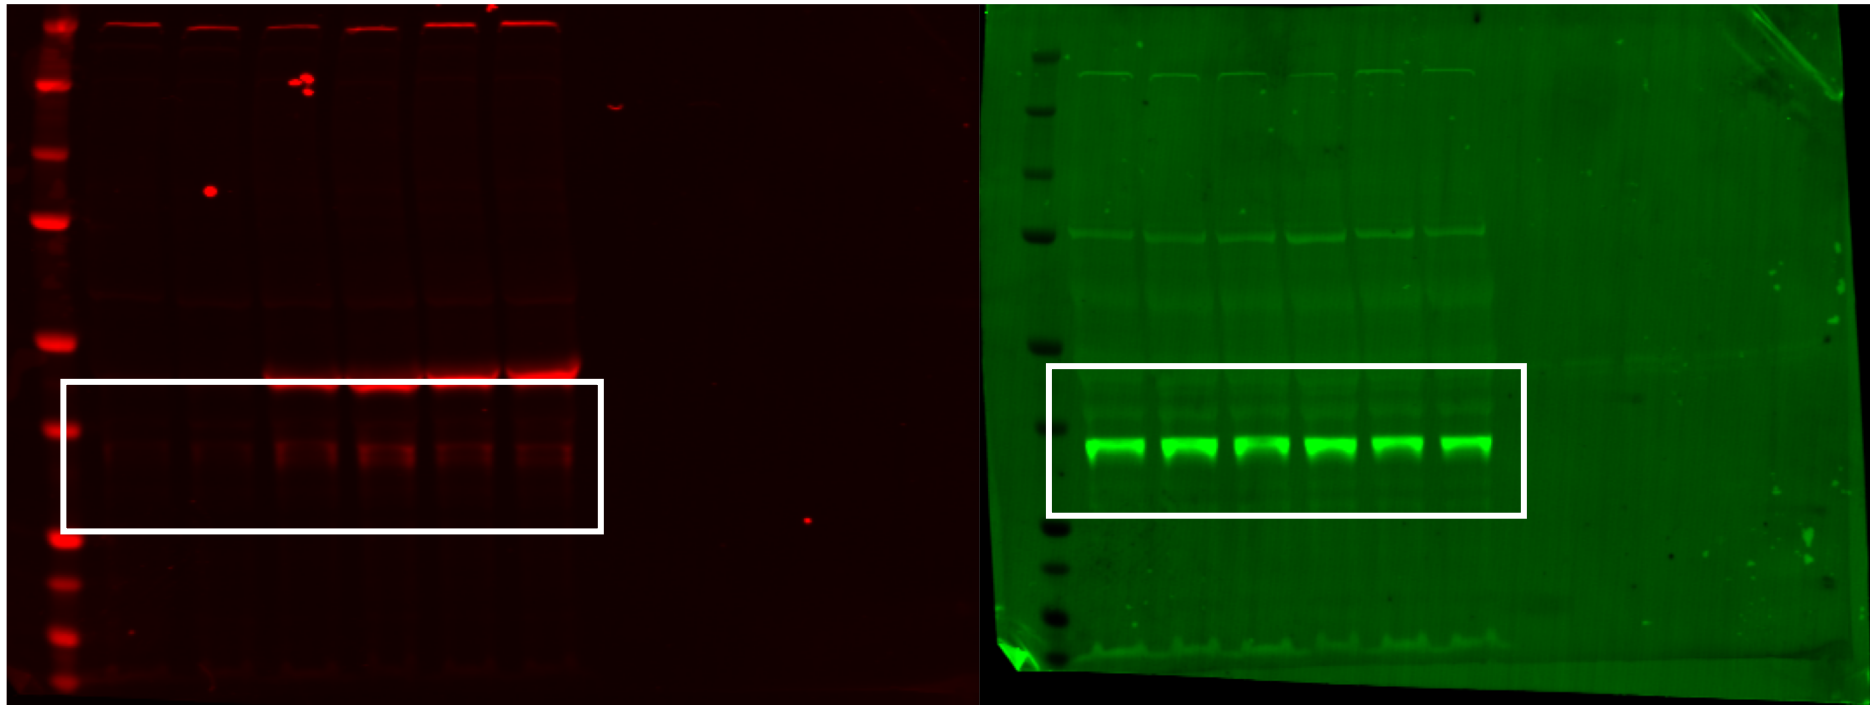

Figure 5- figure supplement 2- source data

Figure 5- figure supplement 2K

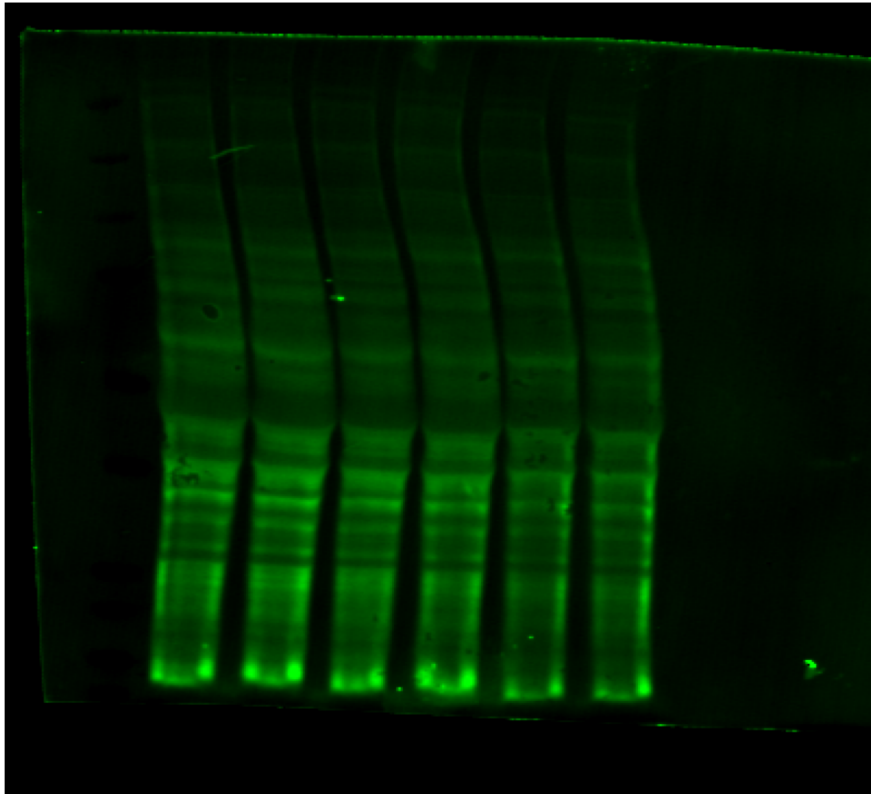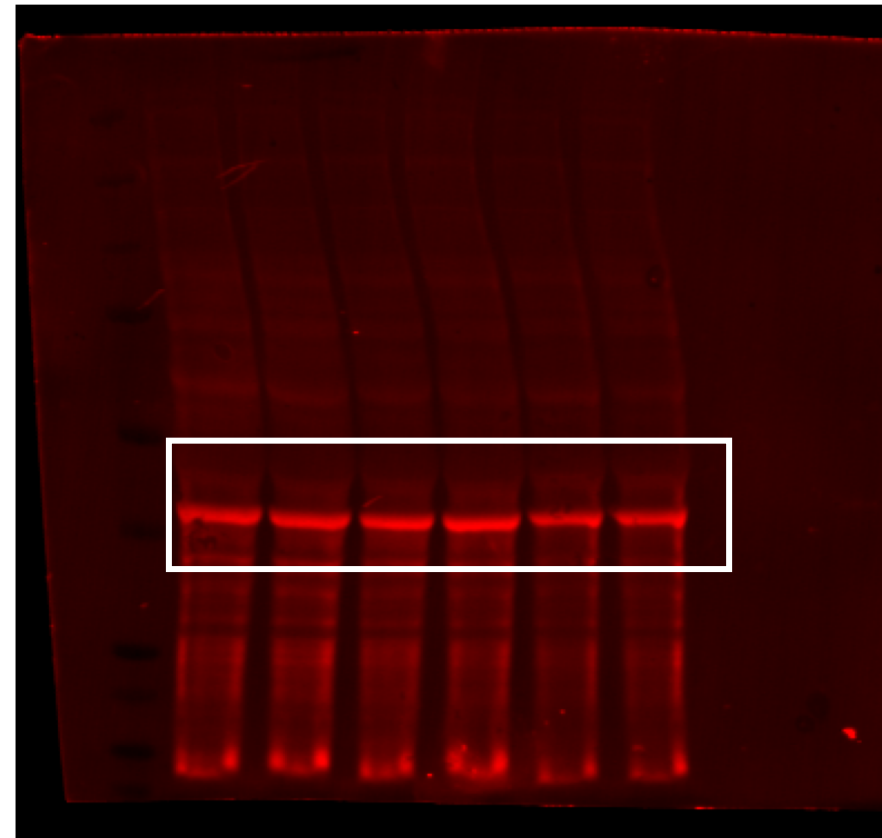

Supplement: supp [file elife-52714-supp-v1.zip]
