# Supplementary material for: The switch-like expression of heme-regulated kinase 1 mediates neuronal proteostasis following proteasome inhibition
Source: eLife journal article supplement (doi:10.7554/elife.52714), 2020-04-24

Figure 2- source data

**Figure 2A**

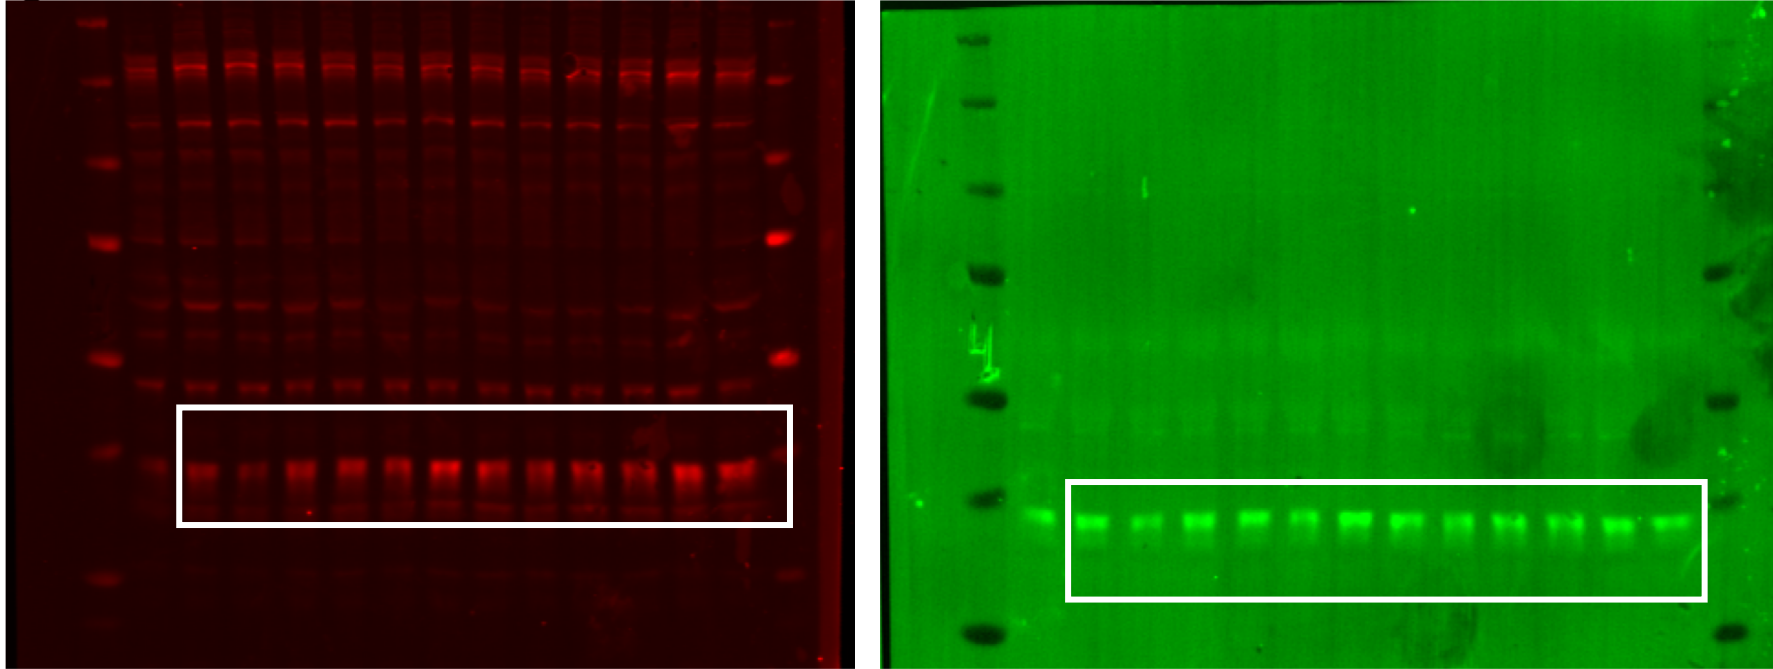

**Figure 2D**

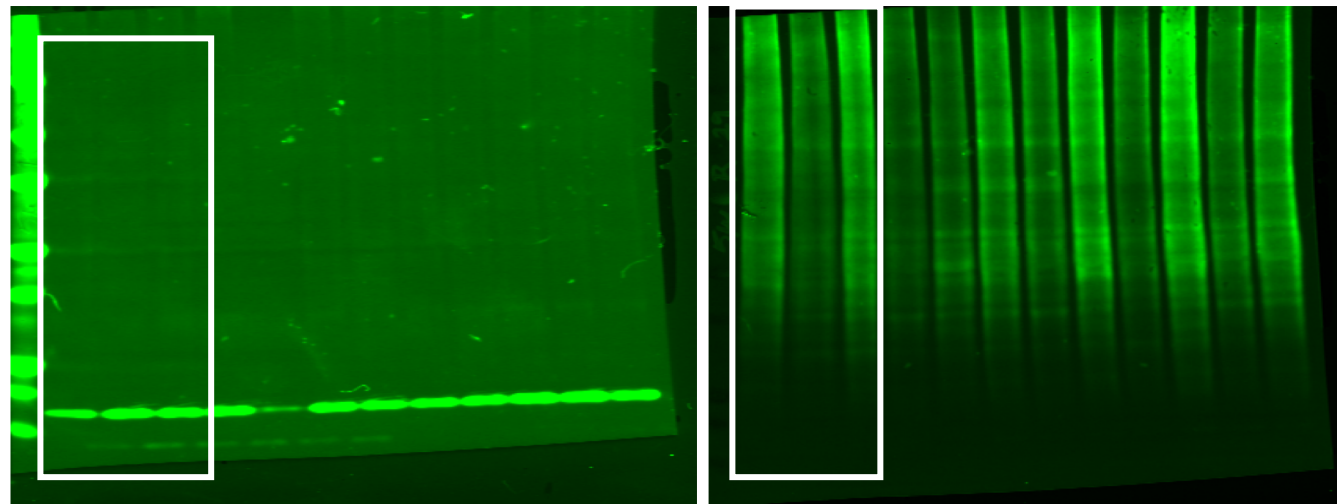

Supplement: supp [file elife-52714-supp-v1.zip]
