# Supplementary material for: The switch-like expression of heme-regulated kinase 1 mediates neuronal proteostasis following proteasome inhibition
Source: eLife journal article supplement (doi:10.7554/elife.52714), 2020-04-24

Figure 3- figure supplement 1- source data

Figure 3-figure supplement 1C

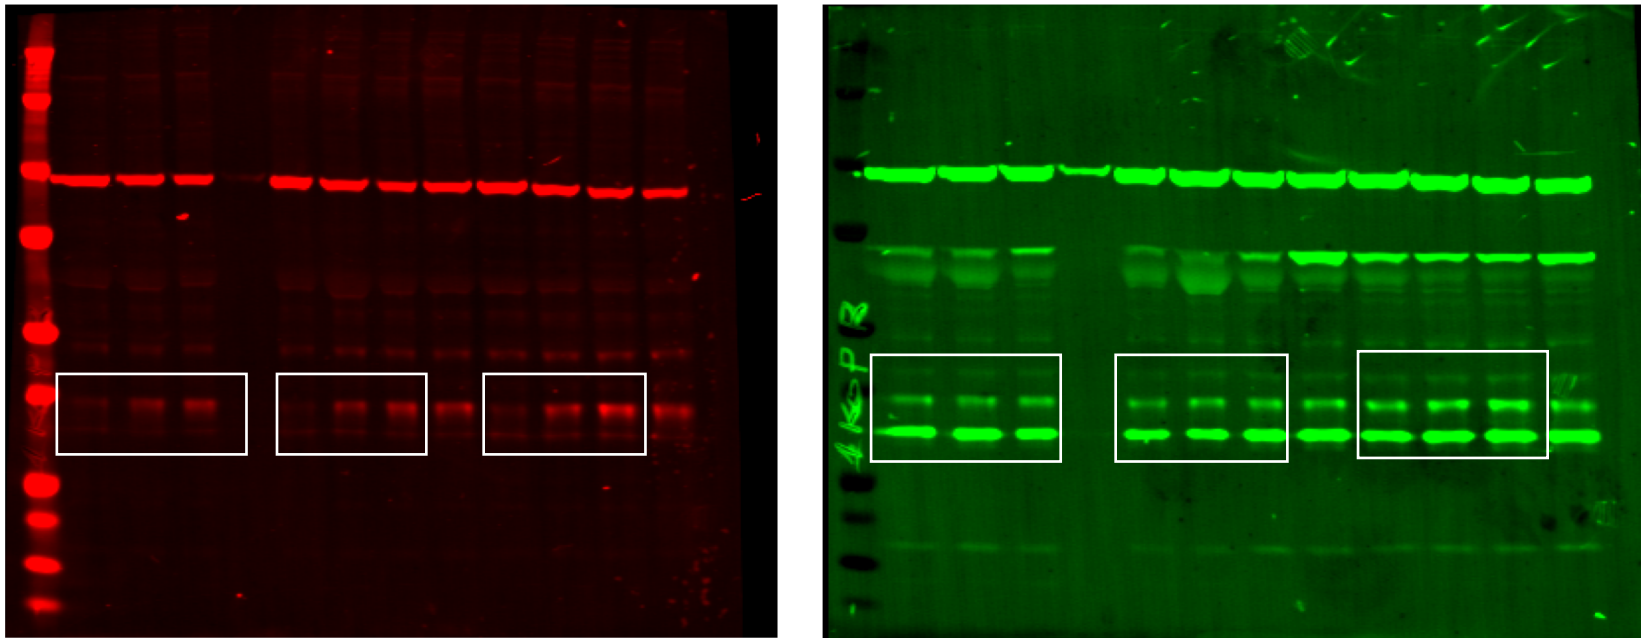

Figure 3- figure supplement 1- source data

Figure 3-figure supplement 1E

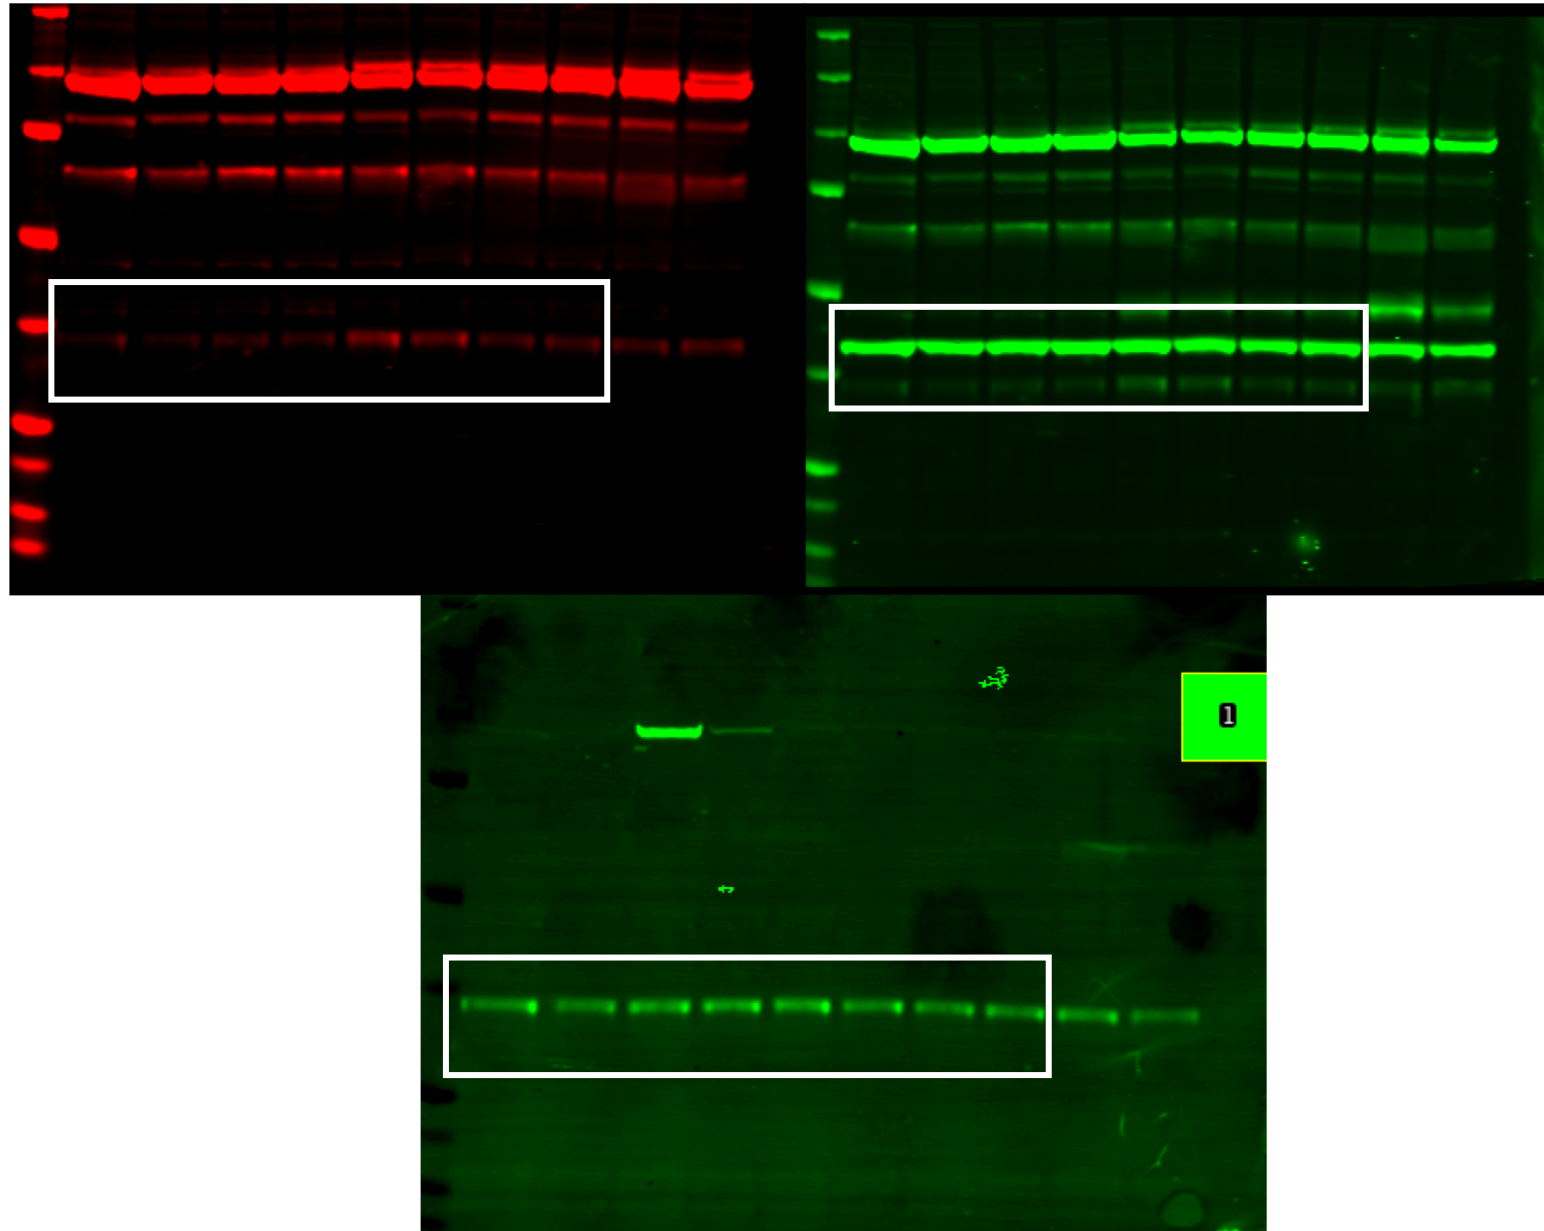

Supplement: supp [file elife-52714-supp-v1.zip]
