# Supplementary material for: The switch-like expression of heme-regulated kinase 1 mediates neuronal proteostasis following proteasome inhibition
Source: eLife. 2020 Apr 24;9:e52714. doi: 10.7554/eLife.52714 (PMC7224698; doi:10.7554/eLife.52714)
Supplement: Supplementary file 1. [file elife-52714-supp1.xlsx]

## Sheet: Sheet1
Amino Acid	Codon Position (mRNA)	Codon	Genomic Frequency/1000	AminoAcid
34	99	TCG	4.4	Ser
275	822	TCG	4.4	Ser
319	954	TCG	4.4	Ser
331	990	TCG	4.4	Ser			Very Rare codon
613	1836	TCG	4.4	Ser			Rare codon
136	405	CGT	5	Arg			Normal codon
62	183	TTA	5.9	Leu
93	276	TTA	5.9	Leu
127	378	TTA	5.9	Leu
164	489	TTA	5.9	Leu
173	516	TTA	5.9	Leu
188	561	TTA	5.9	Leu
290	867	TTA	5.9	Leu
309	924	TTA	5.9	Leu
605	1812	TTA	5.9	Leu
13	36	ACG	6.2	Thr
58	171	ACG	6.2	Thr
206	615	ACG	6.2	Thr
356	1065	ACG	6.2	Thr
482	1443	ACG	6.2	Thr
486	1455	ACG	6.2	Thr
584	1749	ACG	6.2	Thr
82	243	CCG	6.3	Pro
342	1023	CCG	6.3	Pro
483	1446	CCG	6.3	Pro
488	1461	CGA	6.8	Arg
531	1590	CGA	6.8	Arg
17	48	GCG	6.9	Ala
18	51	GCG	6.9	Ala
20	57	GCG	6.9	Ala
23	66	GCG	6.9	Ala
154	459	ATA	6.9	Ile
234	699	ATA	6.9	Ile
291	870	GCG	6.9	Ala
372	1113	GCG	6.9	Ala
393	1176	ATA	6.9	Ile
431	1290	ATA	6.9	Ile
457	1368	ATA	6.9	Ile
495	1482	GCG	6.9	Ala
543	1626	ATA	6.9	Ile
566	1695	GCG	6.9	Ala
595	1782	ATA	6.9	Ile
212	633	CTA	7.6	Leu
535	1602	CTA	7.6	Leu
575	1722	CTA	7.6	Leu
609	1824	CTA	7.6	Leu
78	231	CAT	9.5	His
126	375	CAT	9.5	His
192	573	CAT	9.5	His
259	774	CAT	9.5	His
345	1032	CAT	9.5	His
432	1293	CAT	9.5	His
449	1344	CAT	9.5	His
11	30	CGC	9.8	Arg
140	417	TGT	9.8	Cys
162	483	CGC	9.8	Arg
208	621	TGT	9.8	Cys
385	1152	TGT	9.8	Cys
409	1224	TGT	9.8	Cys
464	1389	TGT	9.8	Cys
492	1473	TGT	9.8	Cys
551	1650	TGT	9.8	Cys
181	540	GTT	10.4	Val
217	648	GTT	10.4	Val
227	678	GTT	10.4	Val
237	708	GTT	10.4	Val
246	735	GTT	10.4	Val
268	801	GTT	10.4	Val
295	882	GTT	10.4	Val
336	1005	GTT	10.4	Val
412	1233	GTT	10.4	Val
416	1245	GTT	10.4	Val
587	1758	GTT	10.4	Val
87	258	TCA	10.9	Ser
161	480	TCA	10.9	Ser
185	552	CGG	10.9	Arg
213	636	CGG	10.9	Arg
257	768	TCA	10.9	Ser
347	1038	TCA	10.9	Ser
373	1116	CGG	10.9	Arg
399	1194	CGG	10.9	Arg
401	1200	CGG	10.9	Arg
496	1485	TCA	10.9	Ser
542	1623	CGG	10.9	Arg
48	141	CAA	11.1	Gln
141	420	CAA	11.1	Gln
243	726	CAA	11.1	Gln
249	744	CAA	11.1	Gln
265	792	CAA	11.1	Gln
324	969	CAA	11.1	Gln
422	1263	CAA	11.1	Gln
453	1356	CAA	11.1	Gln
454	1359	CAA	11.1	Gln
554	1659	CAA	11.1	Gln
582	1743	CAA	11.1	Gln
598	1791	CAA	11.1	Gln
608	1821	CAA	11.1	Gln
117	348	AGA	11.2	Arg
122	363	AGA	11.2	Arg
134	399	AGA	11.2	Arg
150	447	AGA	11.2	Arg
180	537	AGA	11.2	Arg
245	732	AGA	11.2	Arg
263	786	AGA	11.2	Arg
334	999	AGA	11.2	Arg
439	1314	AGA	11.2	Arg
444	1329	AGA	11.2	Arg
477	1428	AGA	11.2	Arg
569	1704	AGA	11.2	Arg
620	1857	AGA	11.2	Arg
190	567	GGT	11.4	Gly
266	795	GGT	11.4	Gly
267	798	GGT	11.4	Gly
427	1278	GGT	11.4	Gly
450	1347	GGT	11.4	Gly
461	1380	GGT	11.4	Gly
515	1542	GGT	11.4	Gly
537	1608	GGT	11.4	Gly
541	1620	GGT	11.4	Gly
38	111	TAT	11.6	Tyr
178	531	TAT	11.6	Tyr
193	576	TAT	11.6	Tyr
411	1230	TAT	11.6	Tyr
505	1512	TAT	11.6	Tyr
557	1668	TAT	11.6	Tyr
129	384	AGG	11.8	Arg
152	453	AGG	11.8	Arg
202	603	AGT	11.8	Ser
274	819	AGT	11.8	Ser
306	915	AGG	11.8	Arg
312	933	AGG	11.8	Arg
315	942	AGT	11.8	Ser
396	1185	AGG	11.8	Arg
415	1242	AGT	11.8	Ser
539	1614	AGG	11.8	Arg
548	1641	AGT	11.8	Ser
550	1647	AGG	11.8	Arg
564	1689	AGG	11.8	Arg
95	282	TGC	11.9	Cys
109	324	TGC	11.9	Cys
403	1206	TGC	11.9	Cys
85	252	CTT	12.5	Leu
240	717	CTT	12.5	Leu
253	756	CTT	12.5	Leu
448	1341	CTT	12.5	Leu
573	1716	CTT	12.5	Leu
612	1833	CTT	12.5	Leu
54	159	TTG	12.8	Leu
72	213	TTG	12.8	Leu
76	225	TTG	12.8	Leu
256	765	TTG	12.8	Leu
302	903	TTG	12.8	Leu
328	981	TTG	12.8	Leu
364	1089	TTG	12.8	Leu
500	1497	TTG	12.8	Leu
514	1539	TTG	12.8	Leu
591	1770	TTG	12.8	Leu
97	288	ACT	12.9	Thr
125	372	ACT	12.9	Thr
160	477	ACT	12.9	Thr
204	609	ACT	12.9	Thr
231	690	ACT	12.9	Thr
491	1470	ACT	12.9	Thr
540	1617	ACT	12.9	Thr
562	1683	ACT	12.9	Thr
233	696	TGG	13.2	Trp
390	1167	TGG	13.2	Trp
392	1173	TGG	13.2	Trp
474	1419	TGG	13.2	Trp
105	312	TCT	14.8	Ser
130	387	TCT	14.8	Ser
144	429	TCT	14.8	Ser
252	753	TCT	14.8	Ser
293	876	TCT	14.8	Ser
359	1074	TCT	14.8	Ser
360	1077	TCT	14.8	Ser
509	1524	TCT	14.8	Ser
571	1710	TCT	14.8	Ser
75	222	CAC	14.9	His
80	237	CAC	14.9	His
86	255	CAC	14.9	His
119	354	CAC	14.9	His
120	357	CAC	14.9	His
223	666	CAC	14.9	His
230	687	CAC	14.9	His
236	705	CAC	14.9	His
238	711	CAC	14.9	His
339	1014	CAC	14.9	His
375	1122	CAC	14.9	His
379	1134	CAC	14.9	His
438	1311	CAC	14.9	His
485	1452	CAC	14.9	His
143	426	AAT	15.1	Asn
165	492	AAT	15.1	Asn
225	672	AAT	15.1	Asn
264	789	AAT	15.1	Asn
271	810	AAT	15.1	Asn
297	888	AAT	15.1	Asn
299	894	AAT	15.1	Asn
352	1053	AAT	15.1	Asn
363	1086	AAT	15.1	Asn
445	1332	AAT	15.1	Asn
586	1755	AAT	15.1	Asn
588	1761	AAT	15.1	Asn
195	582	ATT	15.3	Ile
200	597	ATT	15.3	Ile
248	741	ATT	15.3	Ile
277	828	ATT	15.3	Ile
321	960	ATT	15.3	Ile
370	1107	ACA	15.3	Thr
418	1251	ACA	15.3	Thr
420	1257	ATT	15.3	Ile
446	1335	ATT	15.3	Ile
468	1401	ATT	15.3	Ile
484	1449	ACA	15.3	Thr
527	1578	ACA	15.3	Thr
533	1596	ACA	15.3	Thr
536	1605	ACA	15.3	Thr
583	1746	ACA	15.3	Thr
590	1767	ACA	15.3	Thr
602	1803	ATT	15.3	Ile
3	6	GGG	15.6	Gly
19	54	GGG	15.6	Gly
31	90	GCA	15.6	Ala
45	132	GCA	15.6	Ala
64	189	GCA	15.6	Ala
102	303	GGG	15.6	Gly
158	471	GCA	15.6	Ala
194	579	GCA	15.6	Ala
203	606	GCA	15.6	Ala
219	654	GCA	15.6	Ala
232	693	GCA	15.6	Ala
261	780	GGG	15.6	Gly
344	1029	GGG	15.6	Gly
351	1050	GGG	15.6	Gly
368	1101	GGG	15.6	Gly
407	1218	GCA	15.6	Ala
417	1248	GCA	15.6	Ala
465	1392	GCA	15.6	Ala
472	1413	GCA	15.6	Ala
479	1434	GGG	15.6	Gly
490	1467	GGG	15.6	Gly
526	1575	GGG	15.6	Gly
532	1593	GCA	15.6	Ala
563	1686	GGG	15.6	Gly
617	1848	GGG	15.6	Gly
44	129	CCA	16.1	Pro
84	249	CCA	16.1	Pro
242	723	CCA	16.1	Pro
284	849	CCA	16.1	Pro
335	1002	CCA	16.1	Pro
524	1569	CCA	16.1	Pro
544	1629	CCA	16.1	Pro
552	1653	CCA	16.1	Pro
570	1707	CCA	16.1	Pro
43	126	GTC	16.2	Val
70	207	GTC	16.2	Val
90	267	GTC	16.2	Val
135	402	GTC	16.2	Val
184	549	GTC	16.2	Val
337	1008	GTC	16.2	Val
428	1281	GTC	16.2	Val
437	1308	GTC	16.2	Val
534	1599	GTC	16.2	Val
91	270	TTT	16.5	Phe
98	291	TTT	16.5	Phe
107	318	TTT	16.5	Phe
167	498	TTT	16.5	Phe
279	834	TTT	16.5	Phe
353	1056	TTT	16.5	Phe
421	1260	TTT	16.5	Phe
429	1284	TTT	16.5	Phe
447	1338	TTT	16.5	Phe
460	1377	TTT	16.5	Phe
174	519	GGA	16.6	Gly
177	528	GGA	16.6	Gly
179	534	GGA	16.6	Gly
458	1371	GGA	16.6	Gly
481	1440	GGA	16.6	Gly
502	1503	GGA	16.6	Gly
585	1752	GGA	16.6	Gly
145	432	TAC	17.1	Tyr
163	486	TAC	17.1	Tyr
182	543	TAC	17.1	Tyr
229	684	TAC	17.1	Tyr
305	912	TAC	17.1	Tyr
374	1119	TAC	17.1	Tyr
430	1287	TAC	17.1	Tyr
494	1479	TAC	17.1	Tyr
512	1533	TAC	17.1	Tyr
24	69	CCT	17.4	Pro
25	72	CCT	17.4	Pro
60	177	CCT	17.4	Pro
139	414	CCT	17.4	Pro
289	864	CCT	17.4	Pro
332	993	CCT	17.4	Pro
443	1326	CCT	17.4	Pro
451	1350	CCT	17.4	Pro
497	1488	CCT	17.4	Pro
6	15	TCC	17.8	Ser
41	120	TCC	17.8	Ser
71	210	TCC	17.8	Ser
106	315	TCC	17.8	Ser
115	342	TCC	17.8	Ser
151	450	TCC	17.8	Ser
276	825	TCC	17.8	Ser
320	957	TCC	17.8	Ser
355	1062	TCC	17.8	Ser
388	1161	TCC	17.8	Ser
487	1458	TCC	17.8	Ser
503	1506	TCC	17.8	Ser
546	1635	TCC	17.8	Ser
30	87	CCC	18	Pro
36	105	CCC	18	Pro
53	156	CCC	18	Pro
57	168	CCC	18	Pro
224	669	CCC	18	Pro
247	738	CCC	18	Pro
251	750	CCC	18	Pro
410	1227	CCC	18	Pro
77	228	AGC	19.2	Ser
110	327	AGC	19.2	Ser
114	339	AGC	19.2	Ser
273	816	AGC	19.2	Ser
304	909	AGC	19.2	Ser
313	936	AGC	19.2	Ser
314	939	AGC	19.2	Ser
317	948	AGC	19.2	Ser
346	1035	AGC	19.2	Ser
400	1197	AGC	19.2	Ser
471	1410	AGC	19.2	Ser
513	1536	AGC	19.2	Ser
578	1731	AGC	19.2	Ser
610	1827	AGC	19.2	Ser
108	321	ACC	19.7	Thr
155	462	GCT	19.7	Ala
280	837	GCT	19.7	Ala
283	846	ACC	19.7	Thr
354	1059	ACC	19.7	Thr
394	1179	GCT	19.7	Ala
408	1221	GCT	19.7	Ala
475	1422	ACC	19.7	Thr
572	1713	GCT	19.7	Ala
47	138	CTC	20.4	Leu
104	309	CTC	20.4	Leu
118	351	CTC	20.4	Leu
156	465	CTC	20.4	Leu
170	507	CTC	20.4	Leu
221	660	CTC	20.4	Leu
282	843	CTC	20.4	Leu
323	966	CTC	20.4	Leu
333	996	CTC	20.4	Leu
387	1158	CTC	20.4	Leu
493	1476	CTC	20.4	Leu
519	1554	CTC	20.4	Leu
521	1560	CTC	20.4	Leu
547	1638	CTC	20.4	Leu
560	1677	CTC	20.4	Leu
589	1764	CTC	20.4	Leu
611	1830	CTC	20.4	Leu
8	21	GAT	20.9	Asp
39	114	GAT	20.9	Asp
42	123	GAT	20.9	Asp
111	330	GAT	20.9	Asp
138	411	GAT	20.9	Asp
142	423	GAT	20.9	Asp
189	564	GAT	20.9	Asp
207	618	GAT	20.9	Asp
270	807	GAT	20.9	Asp
294	879	GAT	20.9	Asp
326	975	GAT	20.9	Asp
357	1068	GAT	20.9	Asp
405	1212	GAT	20.9	Asp
440	1317	GAT	20.9	Asp
452	1353	GAT	20.9	Asp
473	1416	GAT	20.9	Asp
506	1515	GAT	20.9	Asp
510	1527	GAT	20.9	Asp
51	150	AAA	21.5	Lys
88	261	AAA	21.5	Lys
92	273	AAA	21.5	Lys
148	441	AAA	21.5	Lys
175	522	AAA	21.5	Lys
187	558	AAA	21.5	Lys
197	588	AAA	21.5	Lys
205	612	AAA	21.5	Lys
269	804	AAA	21.5	Lys
286	855	AAA	21.5	Lys
456	1365	AAA	21.5	Lys
480	1437	AAA	21.5	Lys
549	1644	AAA	21.5	Lys
616	1845	AAA	21.5	Lys
65	192	AAC	21.7	Asn
83	246	AAC	21.7	Asn
121	360	AAC	21.7	Asn
186	555	AAC	21.7	Asn
288	861	AAC	21.7	Asn
300	897	AAC	21.7	Asn
301	900	AAC	21.7	Asn
308	921	AAC	21.7	Asn
329	984	AAC	21.7	Asn
365	1092	AAC	21.7	Asn
397	1188	AAC	21.7	Asn
433	1296	AAC	21.7	Asn
476	1425	AAC	21.7	Asn
478	1431	AAC	21.7	Asn
565	1692	AAC	21.7	Asn
4	9	GGC	21.9	Gly
5	12	GGC	21.9	Gly
9	24	GGC	21.9	Gly
176	525	GGC	21.9	Gly
220	657	GGC	21.9	Gly
228	681	GGC	21.9	Gly
327	978	GGC	21.9	Gly
435	1302	GGC	21.9	Gly
1	0	ATG	23.1	Met
29	84	TTC	23.1	Phe
50	147	TTC	23.1	Phe
59	174	TTC	23.1	Phe
61	180	TTC	23.1	Phe
101	300	ATG	23.1	Met
113	336	TTC	23.1	Phe
128	381	ATG	23.1	Met
146	435	ATG	23.1	Met
209	624	ATG	23.1	Met
377	1128	ATG	23.1	Met
382	1143	ATG	23.1	Met
413	1236	ATG	23.1	Met
434	1299	ATG	23.1	Met
511	1530	ATG	23.1	Met
522	1563	TTC	23.1	Phe
525	1572	TTC	23.1	Phe
529	1584	ATG	23.1	Met
581	1740	TTC	23.1	Phe
593	1776	ATG	23.1	Met
596	1785	ATG	23.1	Met
27	78	ATC	24.4	Ile
99	294	ATC	24.4	Ile
124	369	ATC	24.4	Ile
149	444	ATC	24.4	Ile
172	513	ATC	24.4	Ile
198	591	ATC	24.4	Ile
226	675	ATC	24.4	Ile
278	831	ATC	24.4	Ile
311	930	ATC	24.4	Ile
380	1137	ATC	24.4	Ile
436	1305	ATC	24.4	Ile
467	1398	ATC	24.4	Ile
517	1548	ATC	24.4	Ile
558	1671	ATC	24.4	Ile
74	219	GAA	26.9	Glu
157	468	GAA	26.9	Glu
166	495	GAA	26.9	Glu
168	501	GAA	26.9	Glu
214	639	GAA	26.9	Glu
254	759	GAA	26.9	Glu
260	777	GAA	26.9	Glu
272	813	GAA	26.9	Glu
281	840	GAA	26.9	Glu
285	852	GAA	26.9	Glu
287	858	GAA	26.9	Glu
292	873	GAA	26.9	Glu
316	945	GAA	26.9	Glu
318	951	GAA	26.9	Glu
325	972	GAA	26.9	Glu
350	1047	GAA	26.9	Glu
361	1080	GAA	26.9	Glu
406	1215	GAA	26.9	Glu
423	1266	GAA	26.9	Glu
426	1275	GAA	26.9	Glu
501	1500	GAA	26.9	Glu
528	1581	GAA	26.9	Glu
579	1734	GAA	26.9	Glu
599	1794	GAA	26.9	Glu
601	1800	GAA	26.9	Glu
603	1806	GAA	26.9	Glu
604	1809	GAA	26.9	Glu
22	63	GCC	27.1	Ala
26	75	GCC	27.1	Ala
123	366	GCC	27.1	Ala
131	390	GCC	27.1	Ala
171	510	GCC	27.1	Ala
307	918	GCC	27.1	Ala
414	1239	GCC	27.1	Ala
463	1386	GCC	27.1	Ala
507	1518	GCC	27.1	Ala
555	1662	GCC	27.1	Ala
567	1698	GCC	27.1	Ala
12	33	GAC	28	Asp
14	39	GAC	28	Asp
15	42	GAC	28	Asp
16	45	GAC	28	Asp
28	81	GAC	28	Asp
35	102	GAC	28	Asp
244	729	GAC	28	Asp
262	783	GAC	28	Asp
348	1041	GAC	28	Asp
362	1083	GAC	28	Asp
391	1170	GAC	28	Asp
459	1374	GAC	28	Asp
466	1395	GAC	28	Asp
615	1842	GAC	28	Asp
7	18	GTG	30	Val
21	60	GTG	30	Val
33	96	GTG	30	Val
49	144	GTG	30	Val
63	186	GTG	30	Val
79	234	GTG	30	Val
211	630	GTG	30	Val
215	642	GTG	30	Val
239	714	GTG	30	Val
255	762	GTG	30	Val
303	906	GTG	30	Val
310	927	GTG	30	Val
349	1044	GTG	30	Val
404	1209	GTG	30	Val
425	1272	GTG	30	Val
455	1362	GTG	30	Val
489	1464	GTG	30	Val
516	1545	GTG	30	Val
538	1611	GTG	30	Val
553	1656	GTG	30	Val
55	162	CAG	33.8	Gln
56	165	CAG	33.8	Gln
66	195	CAG	33.8	Gln
89	264	CAG	33.8	Gln
96	285	CAG	33.8	Gln
137	408	CAG	33.8	Gln
147	438	CAG	33.8	Gln
159	474	CAG	33.8	Gln
191	570	CAG	33.8	Gln
222	663	CAG	33.8	Gln
241	720	CAG	33.8	Gln
340	1017	CAG	33.8	Gln
369	1104	CAG	33.8	Gln
381	1140	CAG	33.8	Gln
383	1146	CAG	33.8	Gln
469	1404	CAG	33.8	Gln
499	1494	CAG	33.8	Gln
523	1566	CAG	33.8	Gln
559	1674	CAG	33.8	Gln
568	1701	CAG	33.8	Gln
574	1719	CAG	33.8	Gln
577	1728	CAG	33.8	Gln
592	1773	CAG	33.8	Gln
614	1839	CAG	33.8	Gln
37	108	AAG	35.1	Lys
100	297	AAG	35.1	Lys
132	393	AAG	35.1	Lys
183	546	AAG	35.1	Lys
196	585	AAG	35.1	Lys
201	600	AAG	35.1	Lys
210	627	AAG	35.1	Lys
216	645	AAG	35.1	Lys
296	885	AAG	35.1	Lys
338	1011	AAG	35.1	Lys
398	1191	AAG	35.1	Lys
402	1203	AAG	35.1	Lys
419	1254	AAG	35.1	Lys
442	1323	AAG	35.1	Lys
470	1407	AAG	35.1	Lys
508	1521	AAG	35.1	Lys
556	1665	AAG	35.1	Lys
594	1779	AAG	35.1	Lys
600	1797	AAG	35.1	Lys
606	1815	AAG	35.1	Lys
607	1818	AAG	35.1	Lys
619	1854	AAG	35.1	Lys
2	3	CTG	41.1	Leu
67	198	CTG	41.1	Leu
68	201	CTG	41.1	Leu
69	204	CTG	41.1	Leu
73	216	CTG	41.1	Leu
94	279	CTG	41.1	Leu
103	306	CTG	41.1	Leu
116	345	CTG	41.1	Leu
199	594	CTG	41.1	Leu
218	651	CTG	41.1	Leu
250	747	CTG	41.1	Leu
341	1020	CTG	41.1	Leu
343	1026	CTG	41.1	Leu
366	1095	CTG	41.1	Leu
367	1098	CTG	41.1	Leu
376	1125	CTG	41.1	Leu
378	1131	CTG	41.1	Leu
384	1149	CTG	41.1	Leu
389	1164	CTG	41.1	Leu
424	1269	CTG	41.1	Leu
441	1320	CTG	41.1	Leu
462	1383	CTG	41.1	Leu
518	1551	CTG	41.1	Leu
561	1680	CTG	41.1	Leu
576	1725	CTG	41.1	Leu
580	1737	CTG	41.1	Leu
618	1851	CTG	41.1	Leu
10	27	GAG	41.3	Glu
32	93	GAG	41.3	Glu
40	117	GAG	41.3	Glu
46	135	GAG	41.3	Glu
52	153	GAG	41.3	Glu
81	240	GAG	41.3	Glu
112	333	GAG	41.3	Glu
133	396	GAG	41.3	Glu
153	456	GAG	41.3	Glu
169	504	GAG	41.3	Glu
235	702	GAG	41.3	Glu
258	771	GAG	41.3	Glu
298	891	GAG	41.3	Glu
322	963	GAG	41.3	Glu
330	987	GAG	41.3	Glu
358	1071	GAG	41.3	Glu
371	1110	GAG	41.3	Glu
386	1155	GAG	41.3	Glu
395	1182	GAG	41.3	Glu
498	1491	GAG	41.3	Glu
504	1509	GAG	41.3	Glu
520	1557	GAG	41.3	Glu
530	1587	GAG	41.3	Glu
545	1632	GAG	41.3	Glu
597	1788	GAG	41.3	Glu
