# Supplementary figures and images for: The switch-like expression of heme-regulated kinase 1 mediates neuronal proteostasis following proteasome inhibition
Source: eLife journal article supplement (doi:10.7554/elife.52714), 2020-04-24

Figure 3 Supplement 1

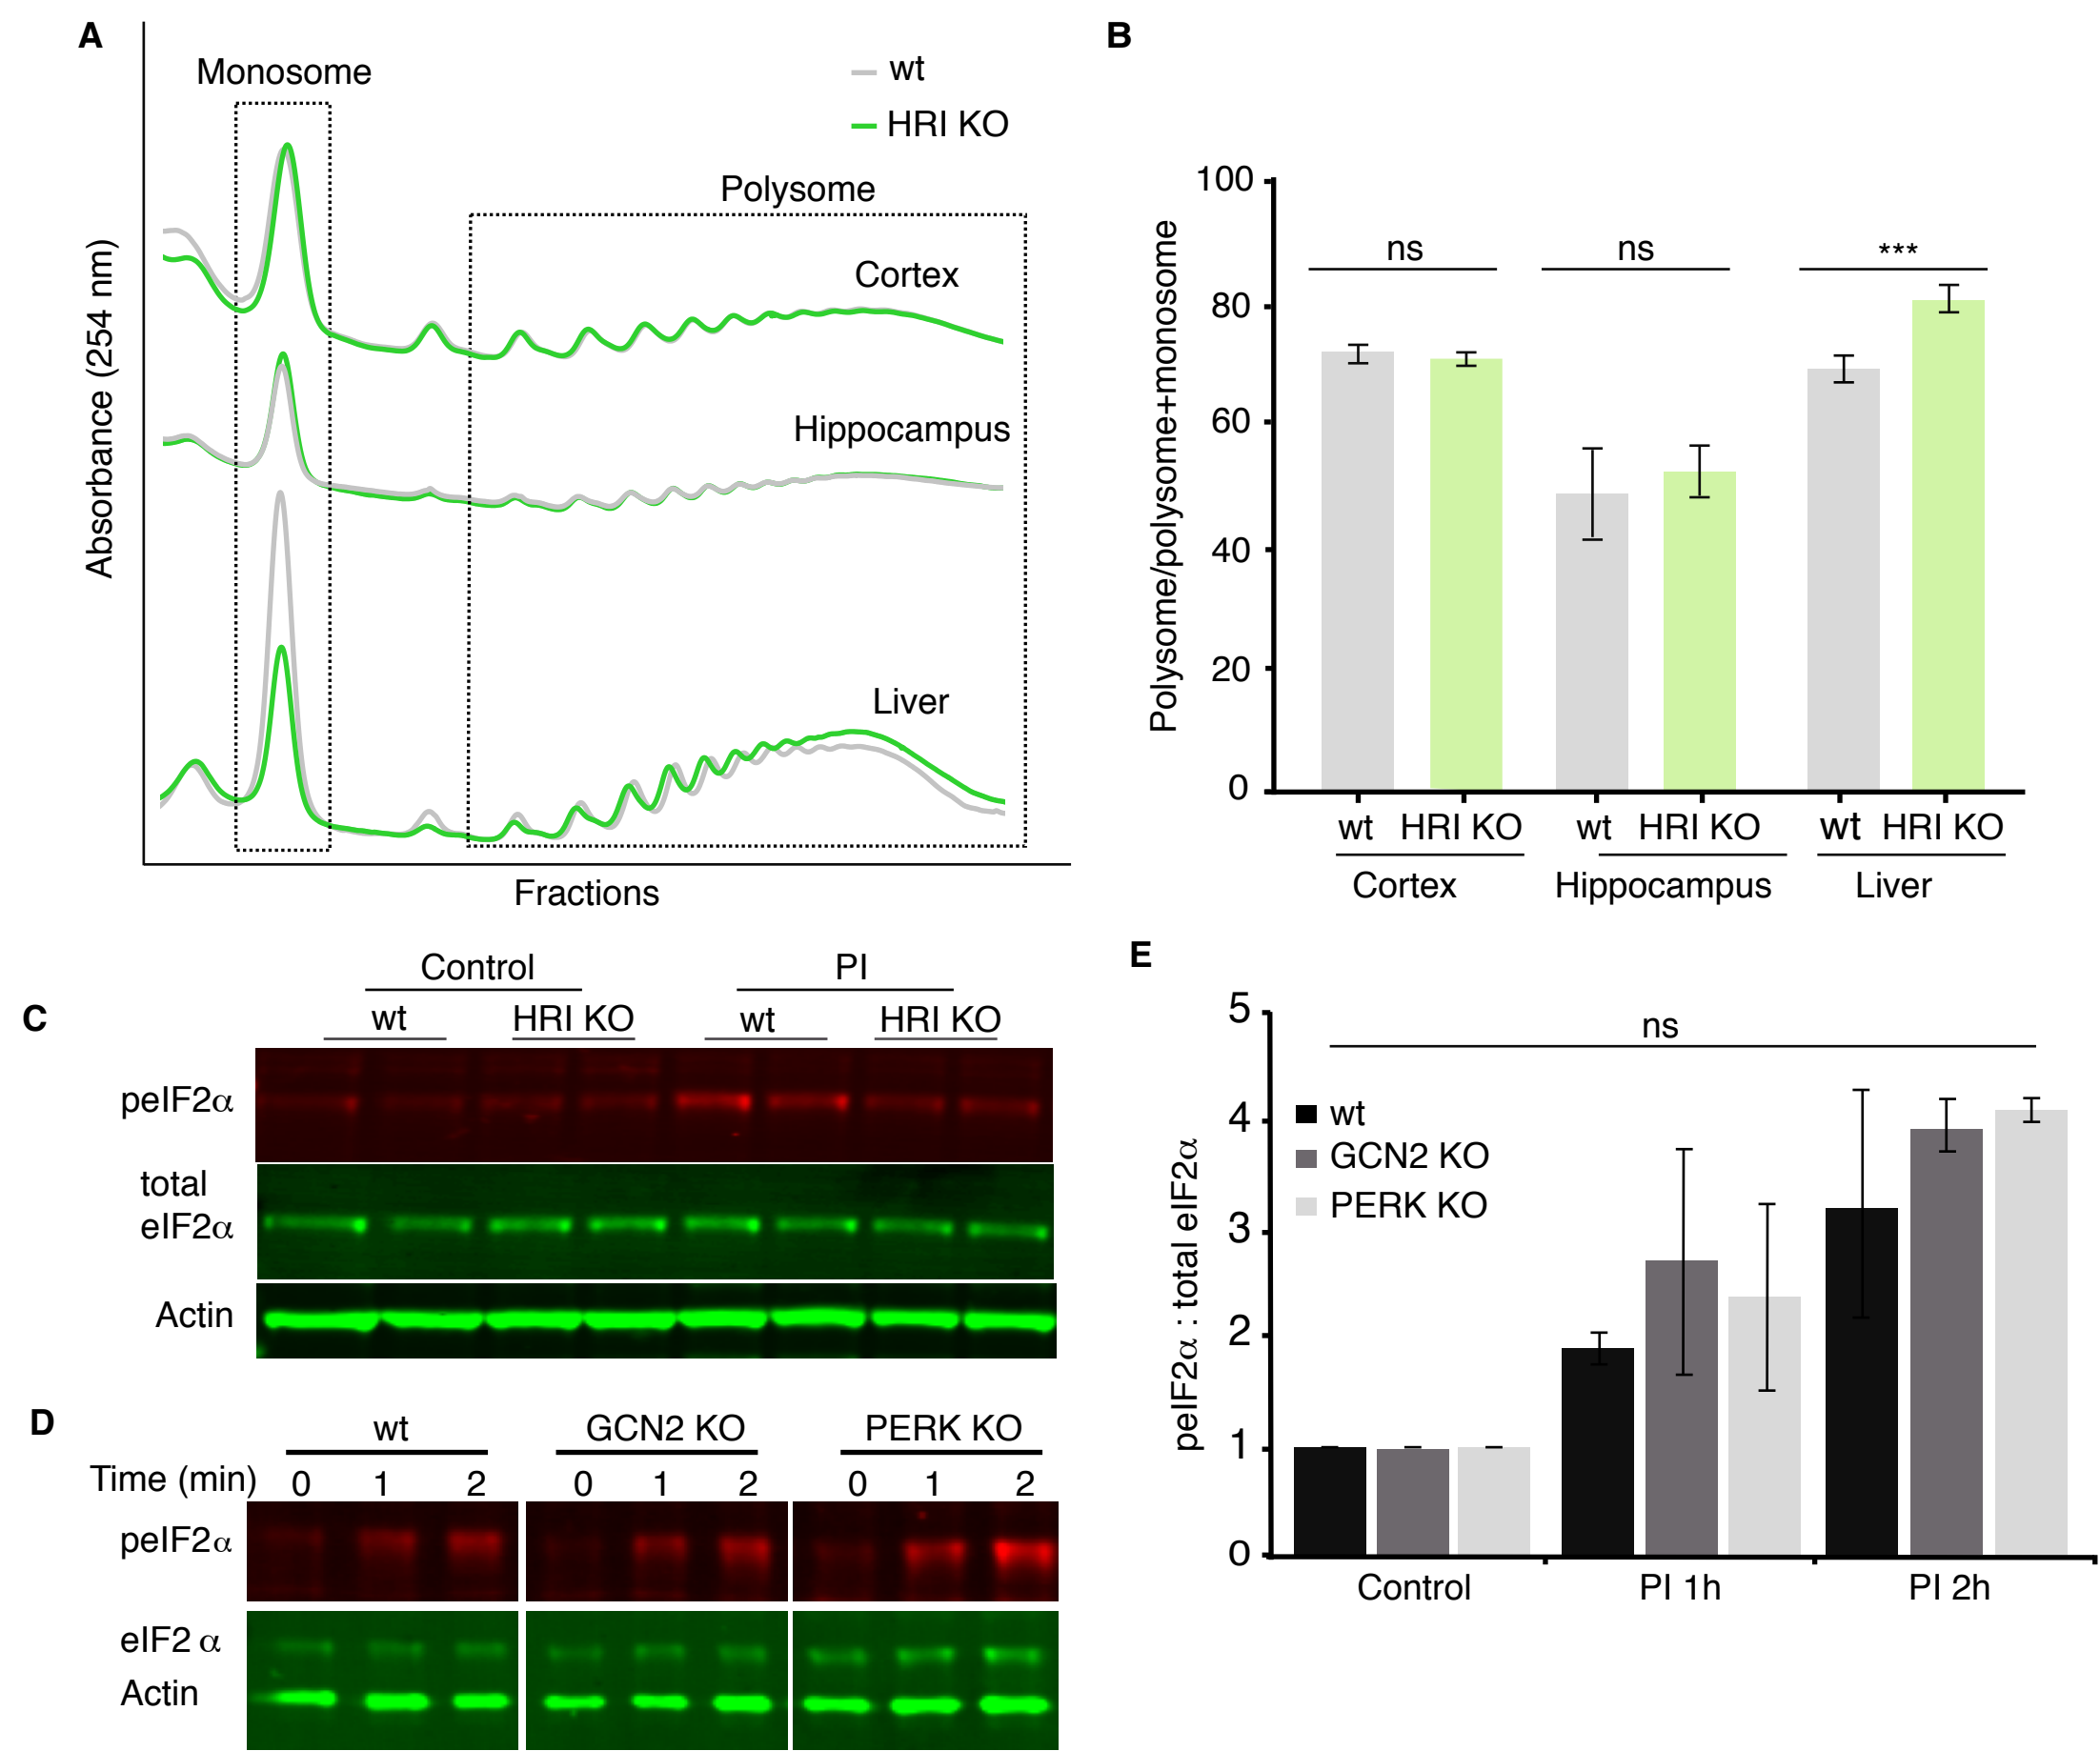

Supplement: supp [file elife-52714-supp-v1.zip]

Figure 6 Supplement 1

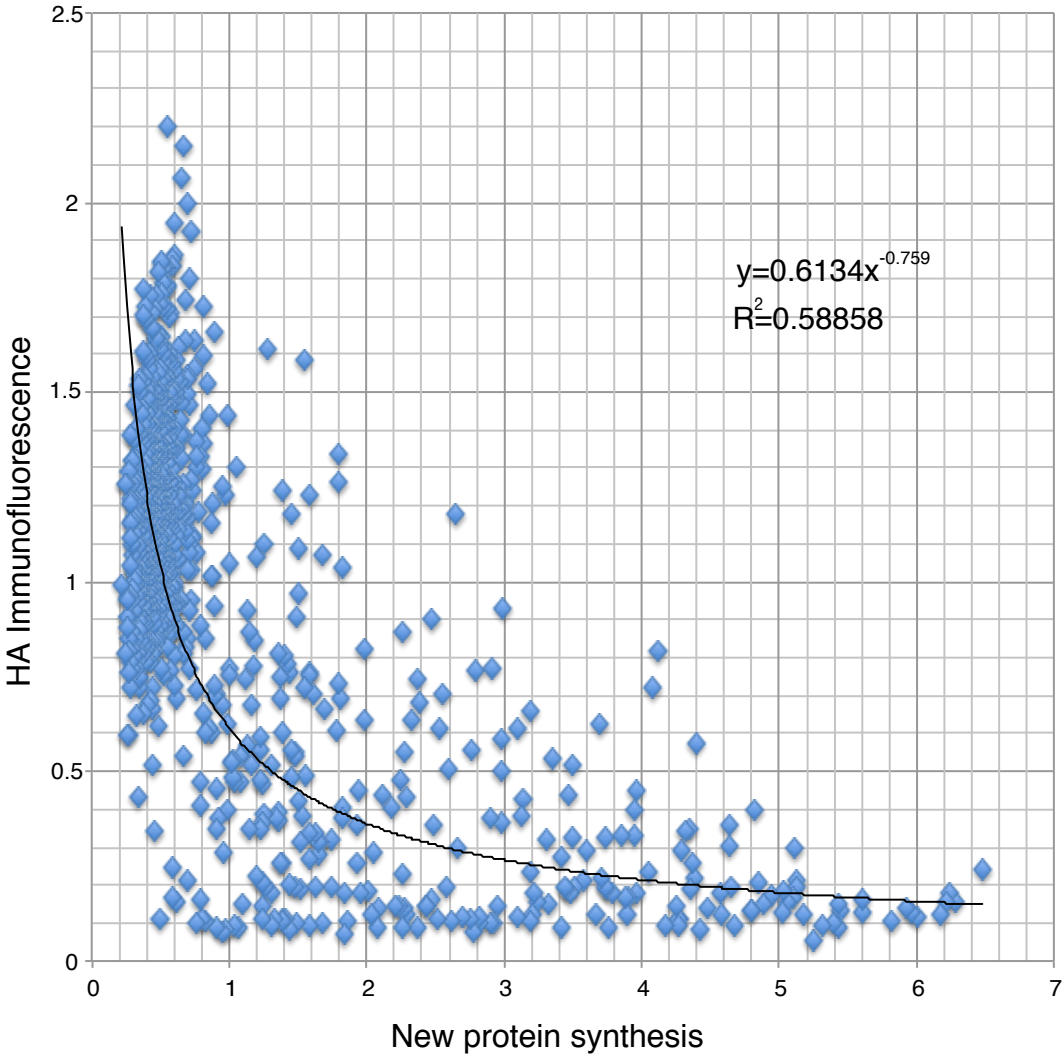

Supplement: supp [file elife-52714-supp-v1.zip]

Figure 5 Supplement 1

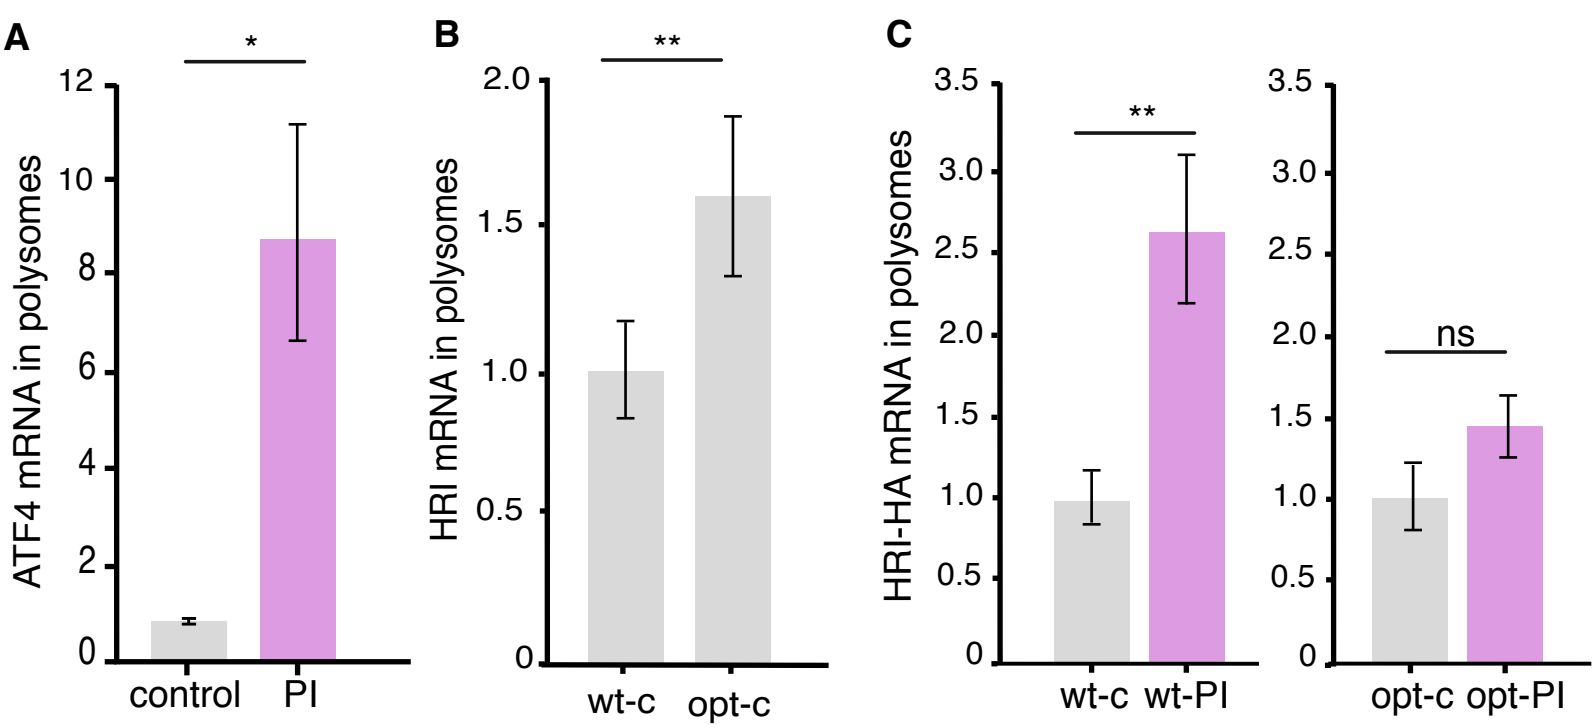

Supplement: supp [file elife-52714-supp-v1.zip]

Figure 5 Supplement 2

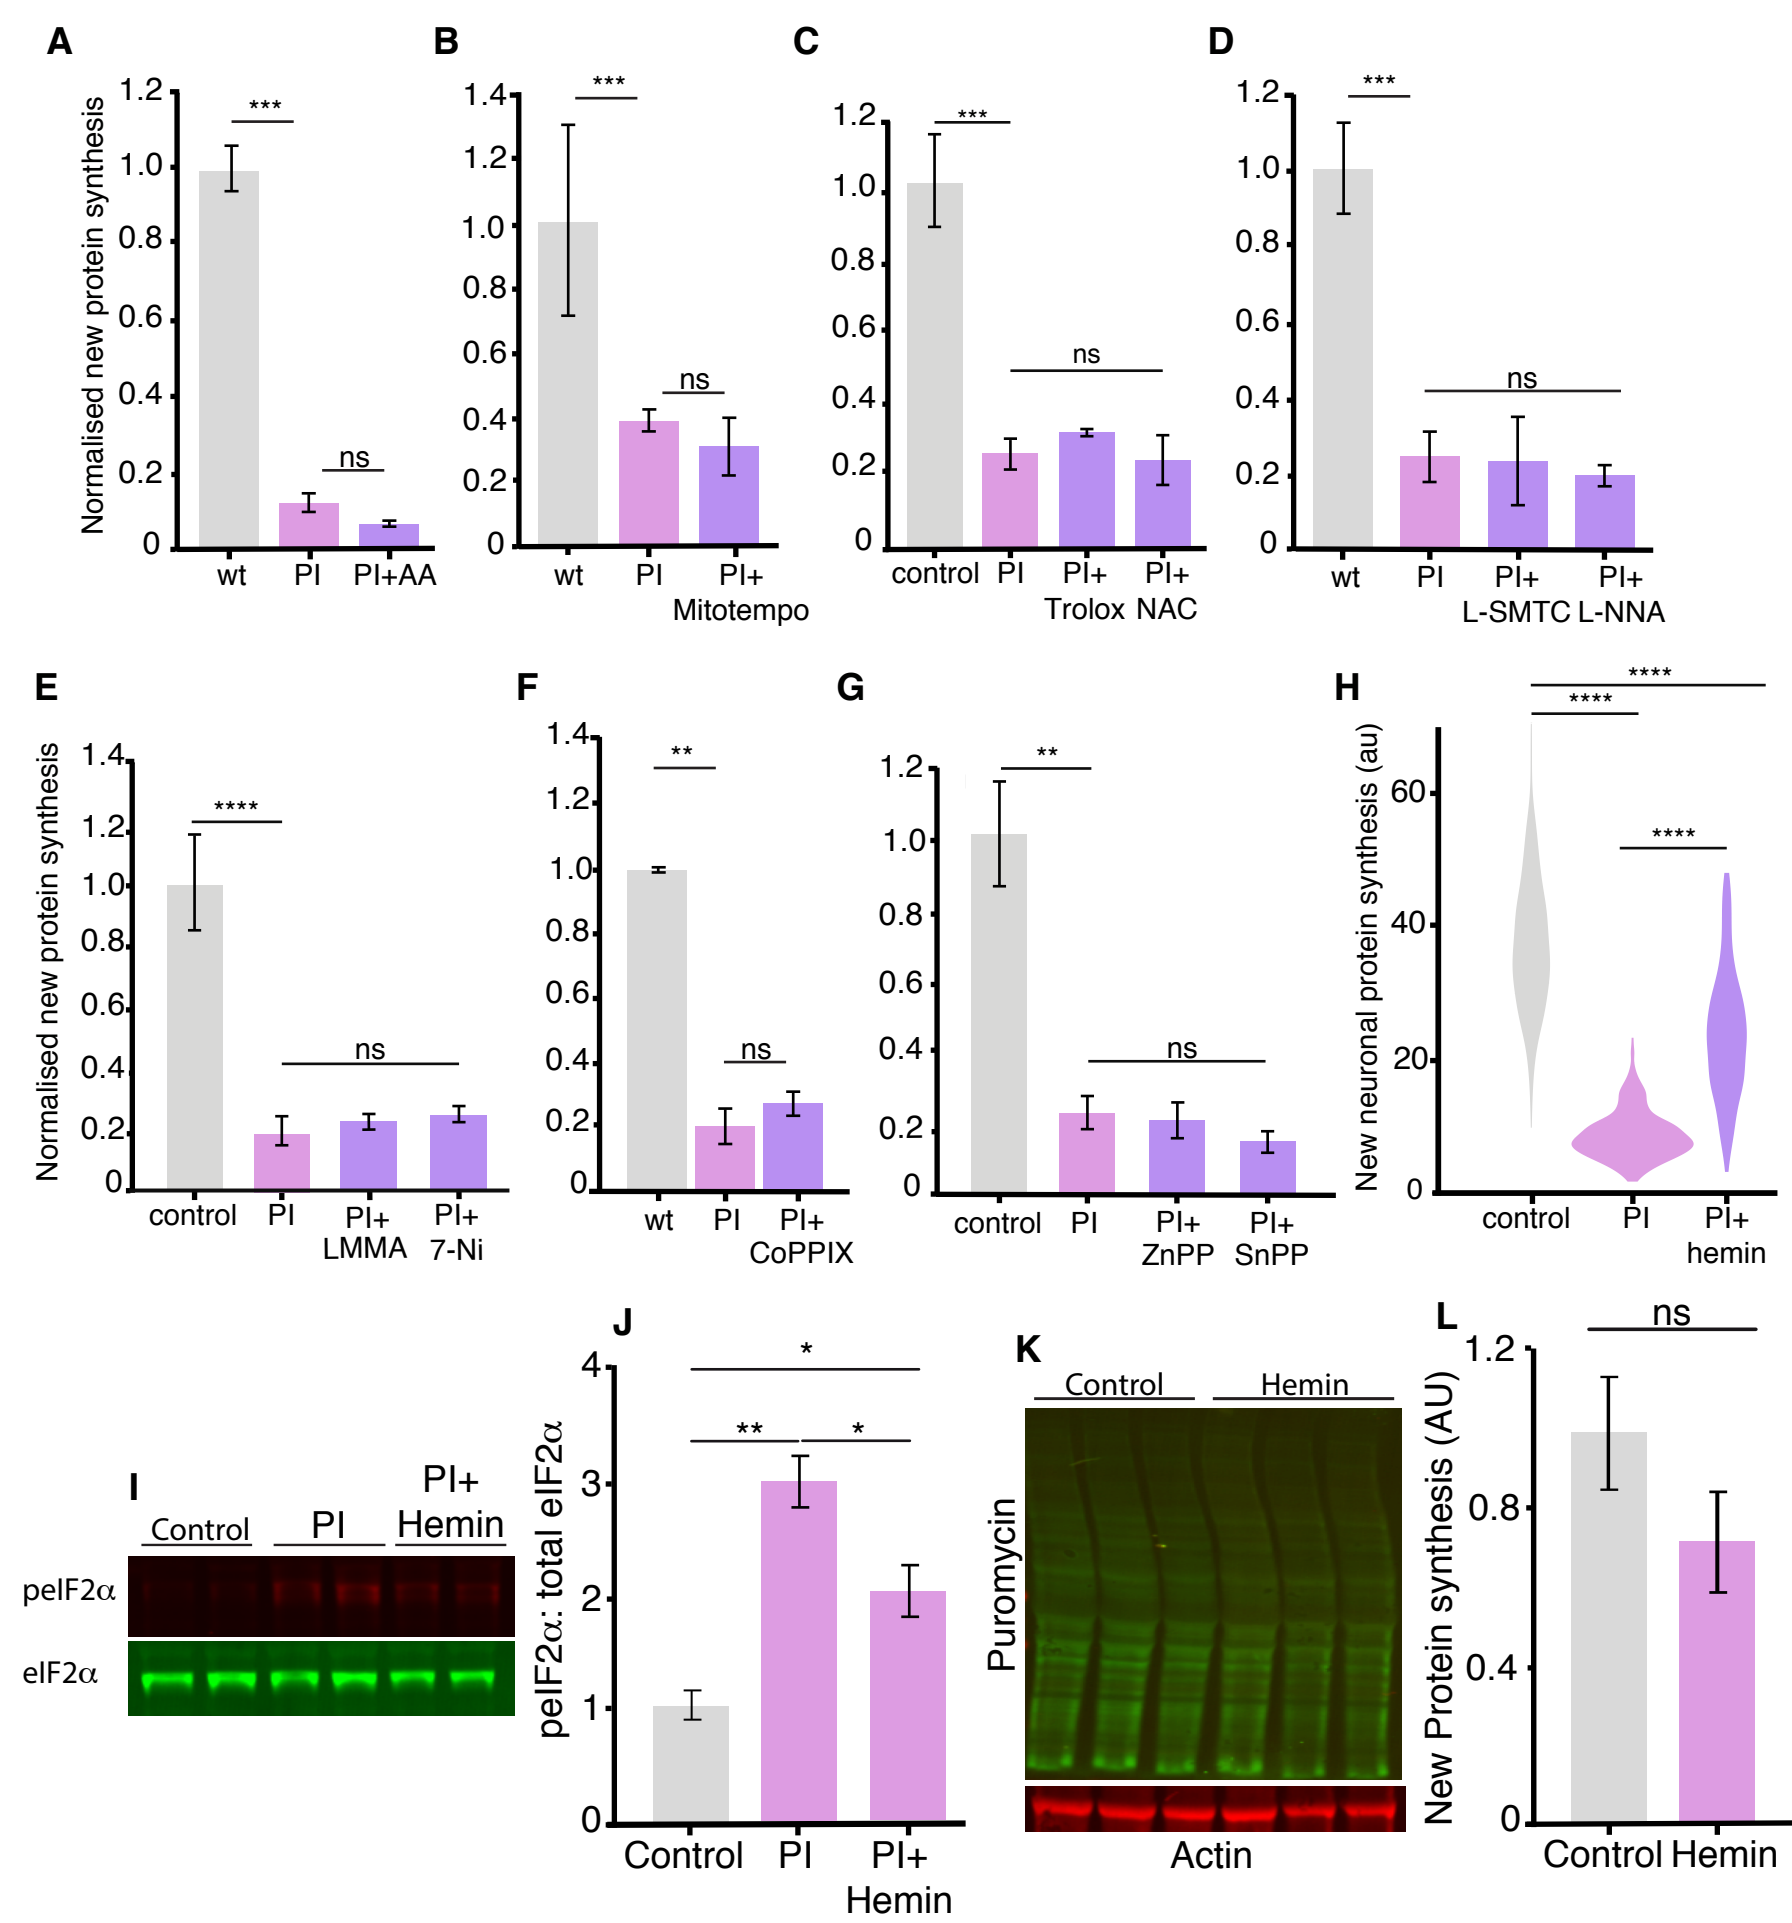

Supplement: supp [file elife-52714-supp-v1.zip]

Figure 1 Supplement 1

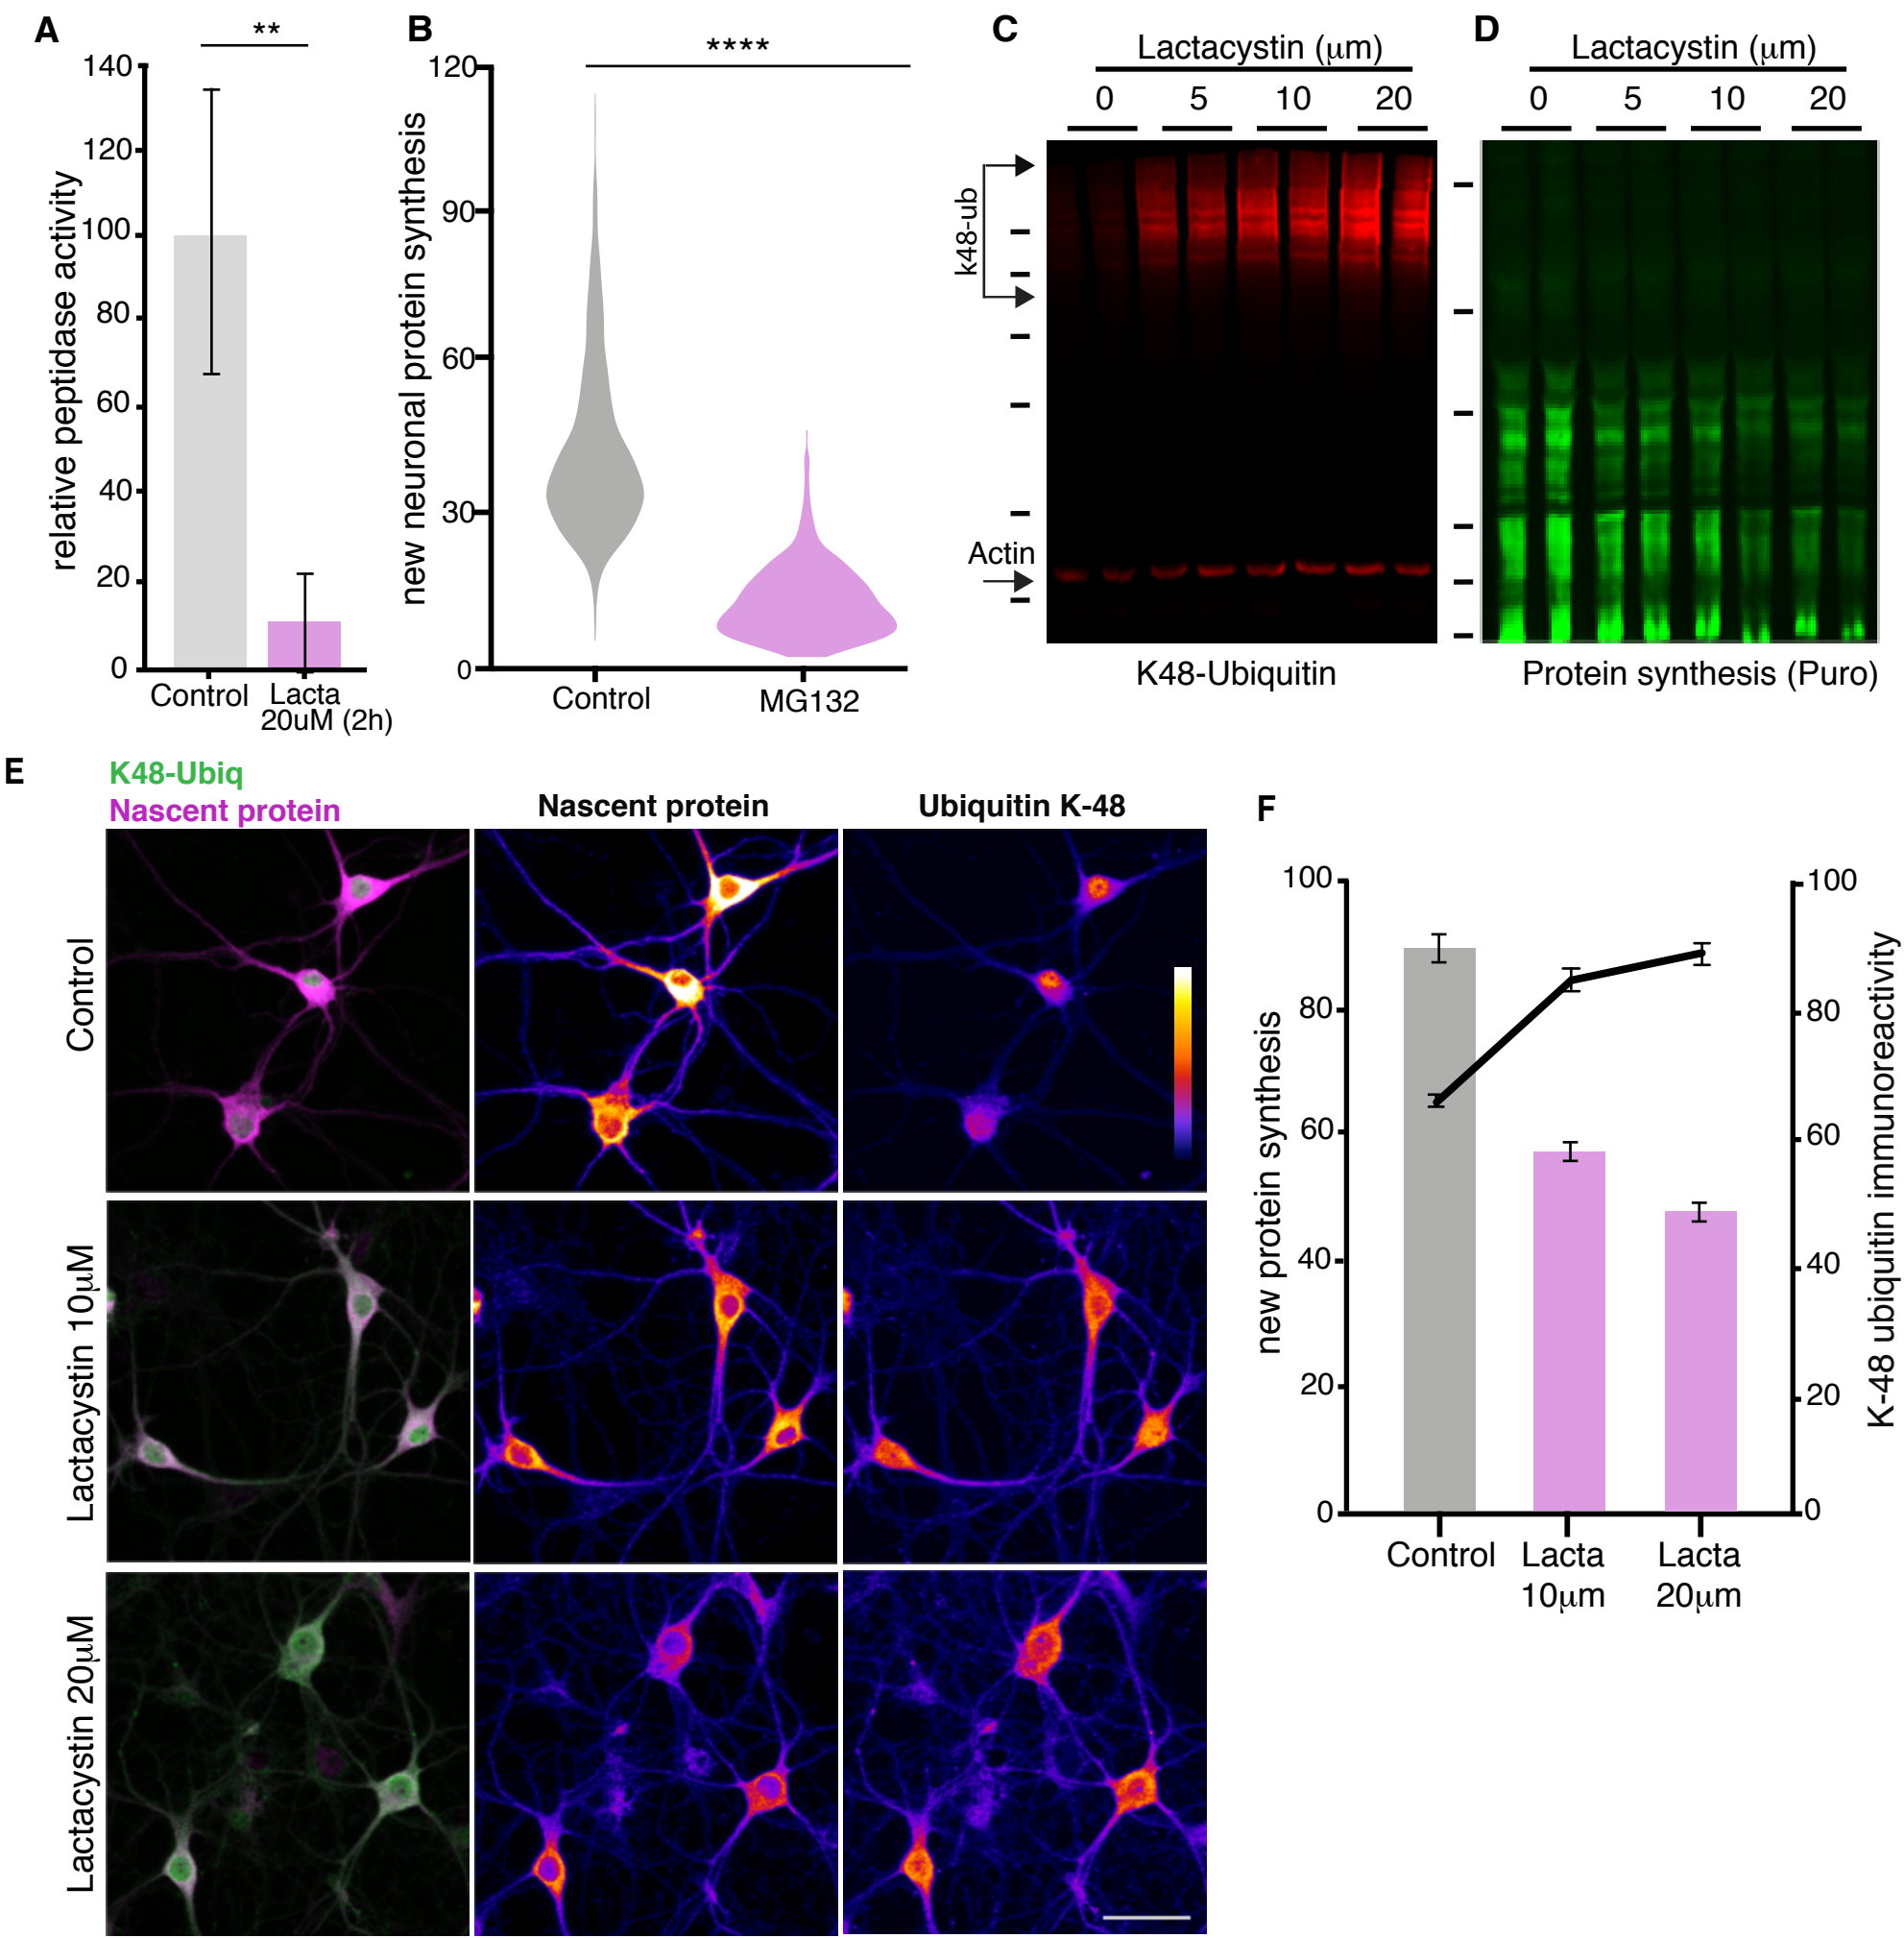

Supplement: supp [file elife-52714-supp-v1.zip]

Figure 1 Supplement 2

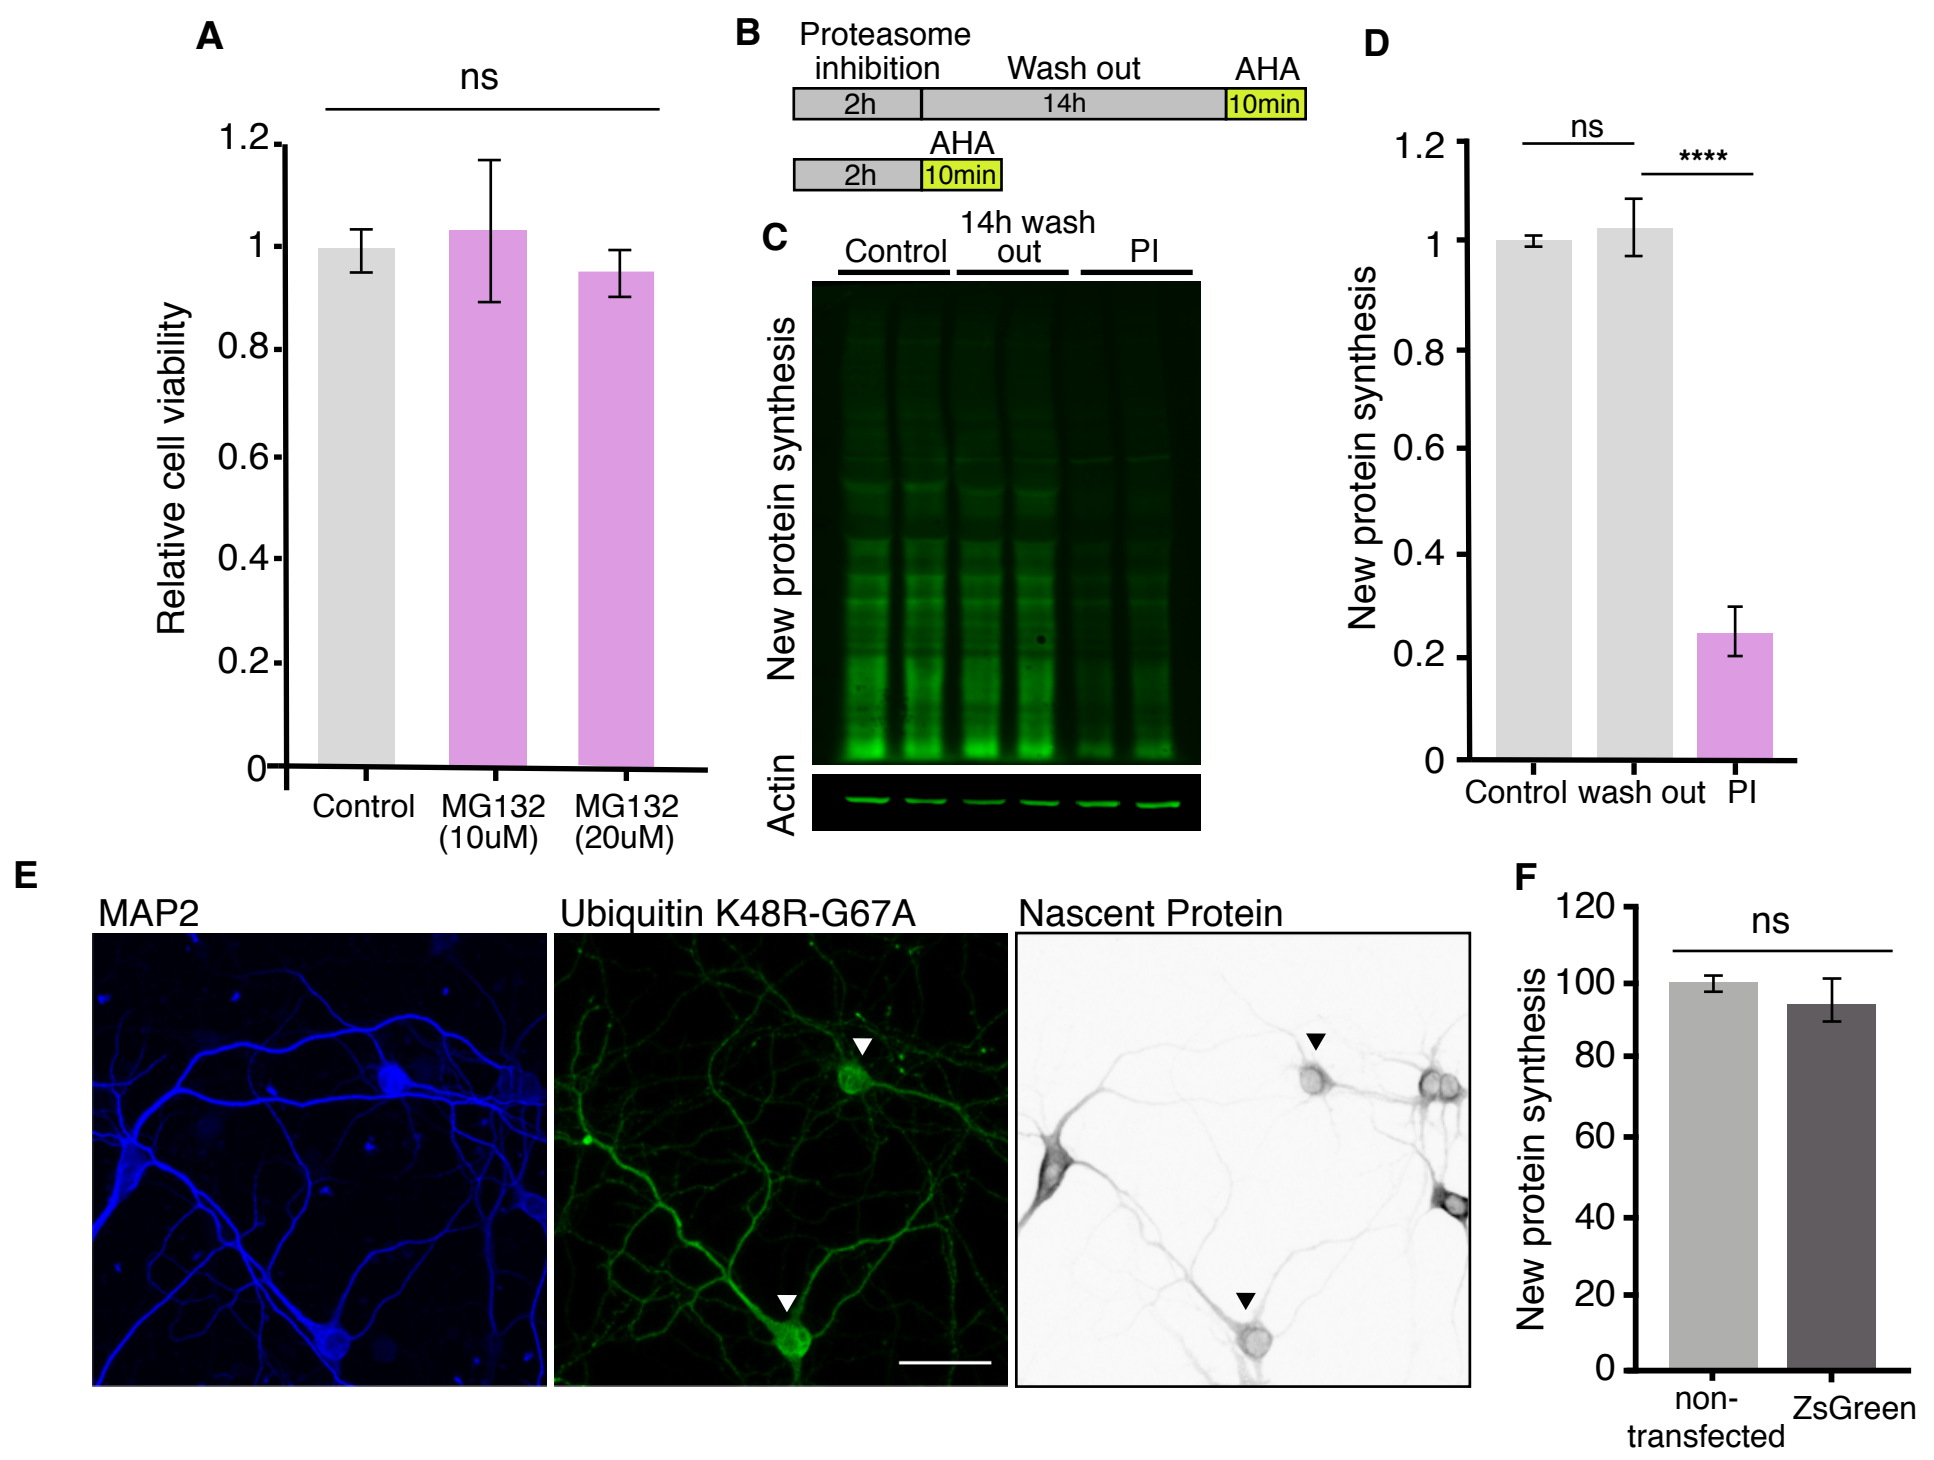

Supplement: supp [file elife-52714-supp-v1.zip]

Figure 4 Supplement 1

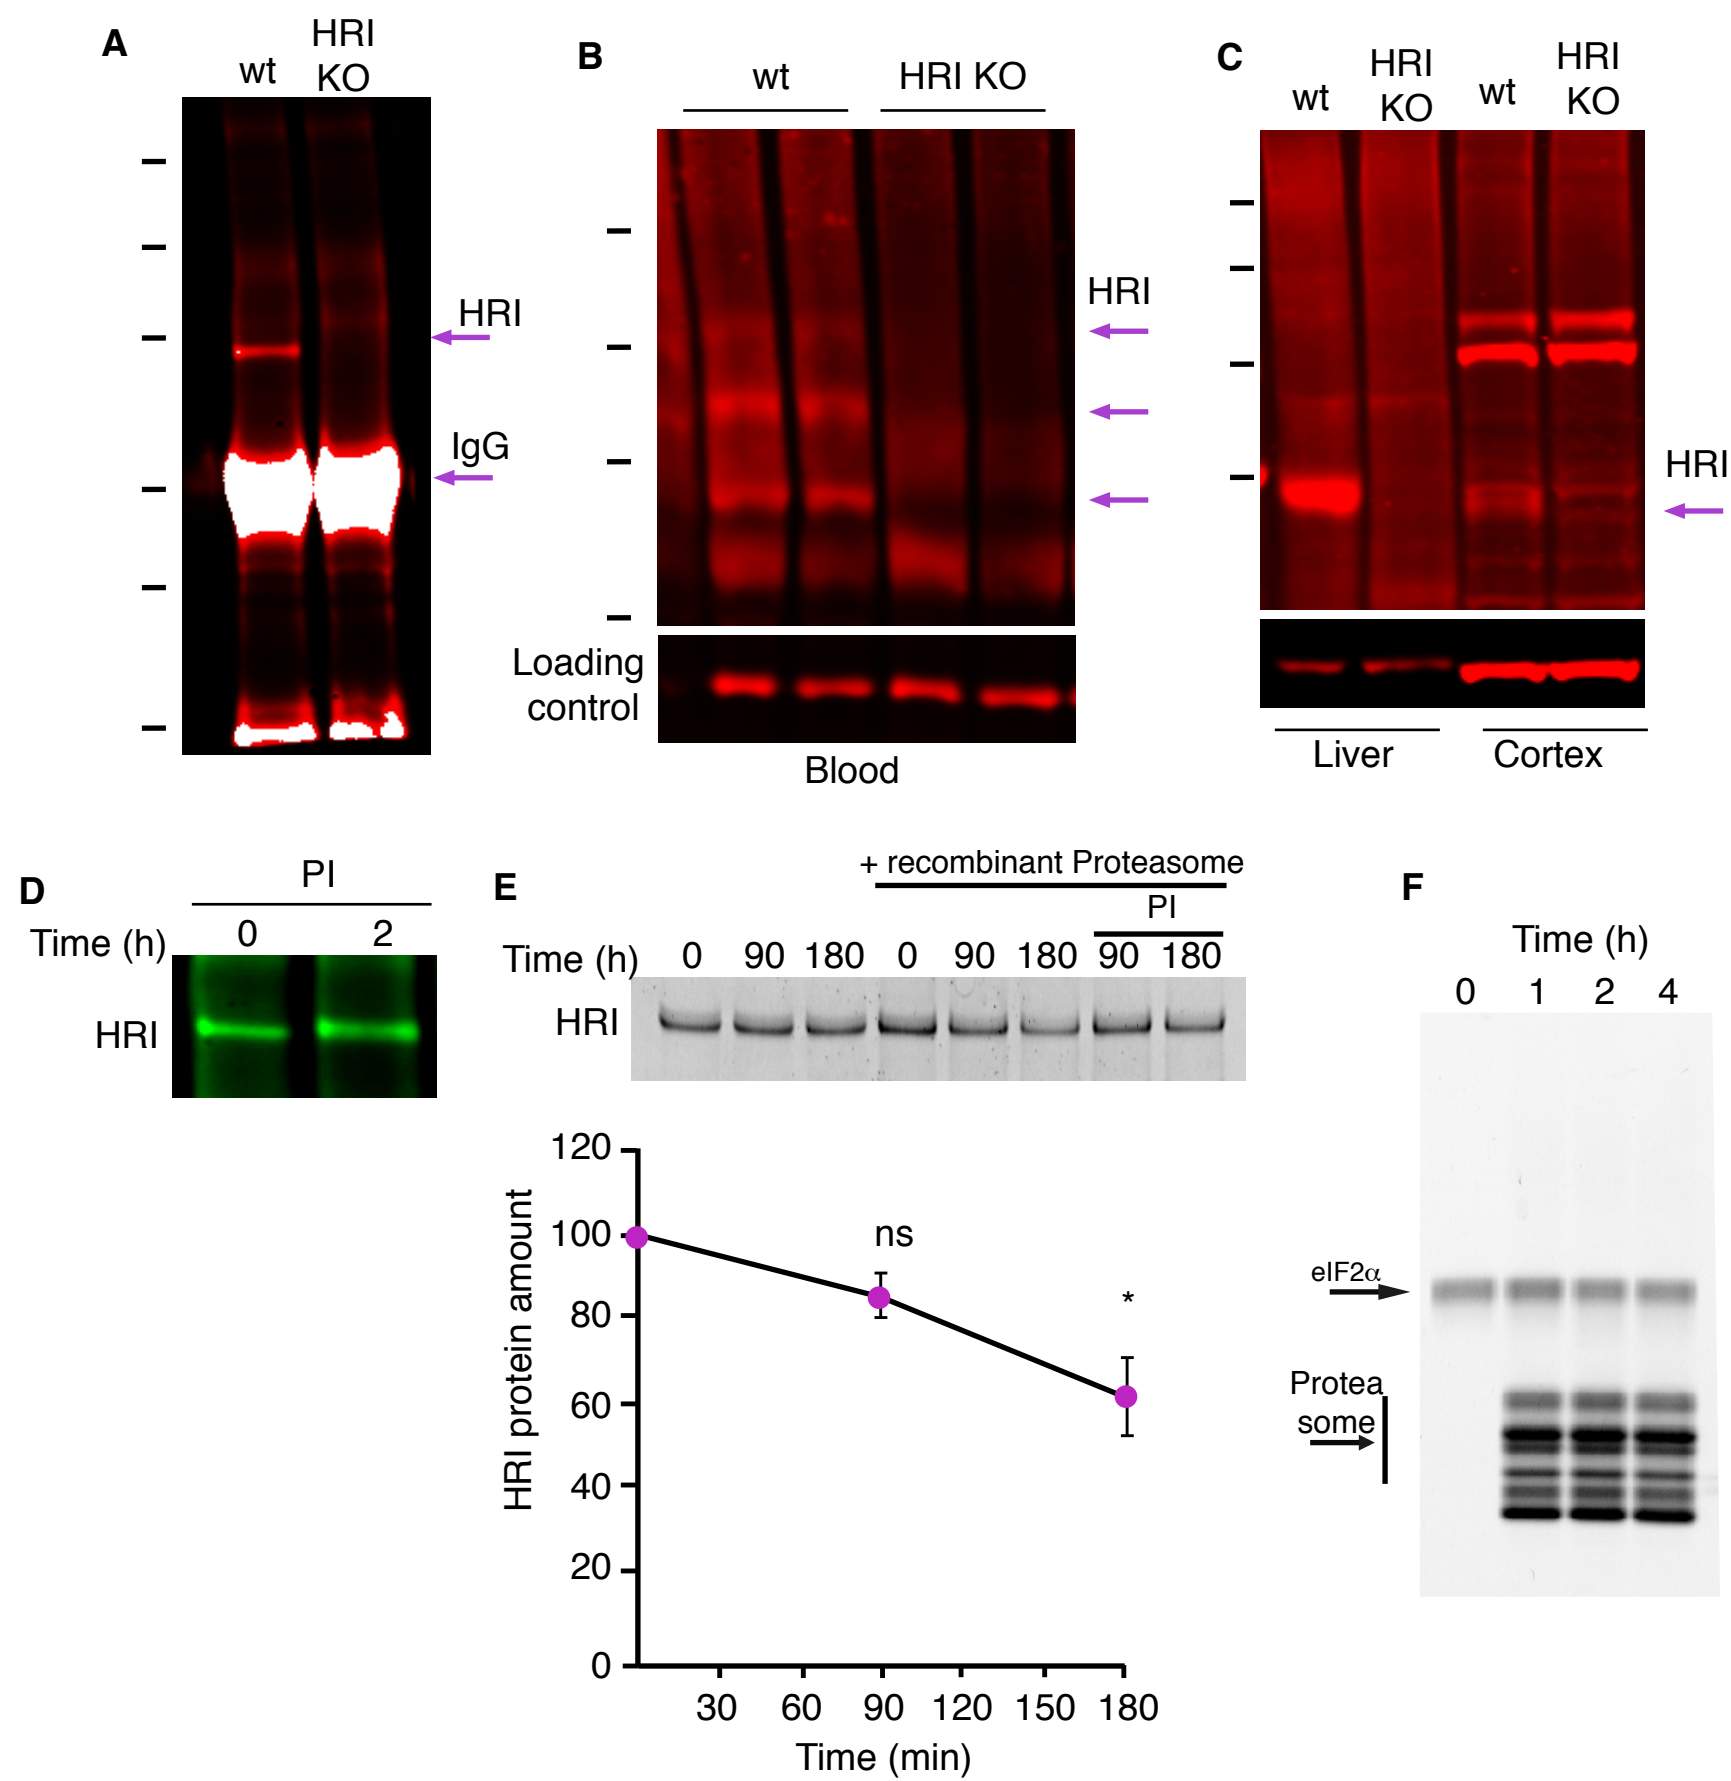

Supplement: supp [file elife-52714-supp-v1.zip]

Figure 4 Supplement 2

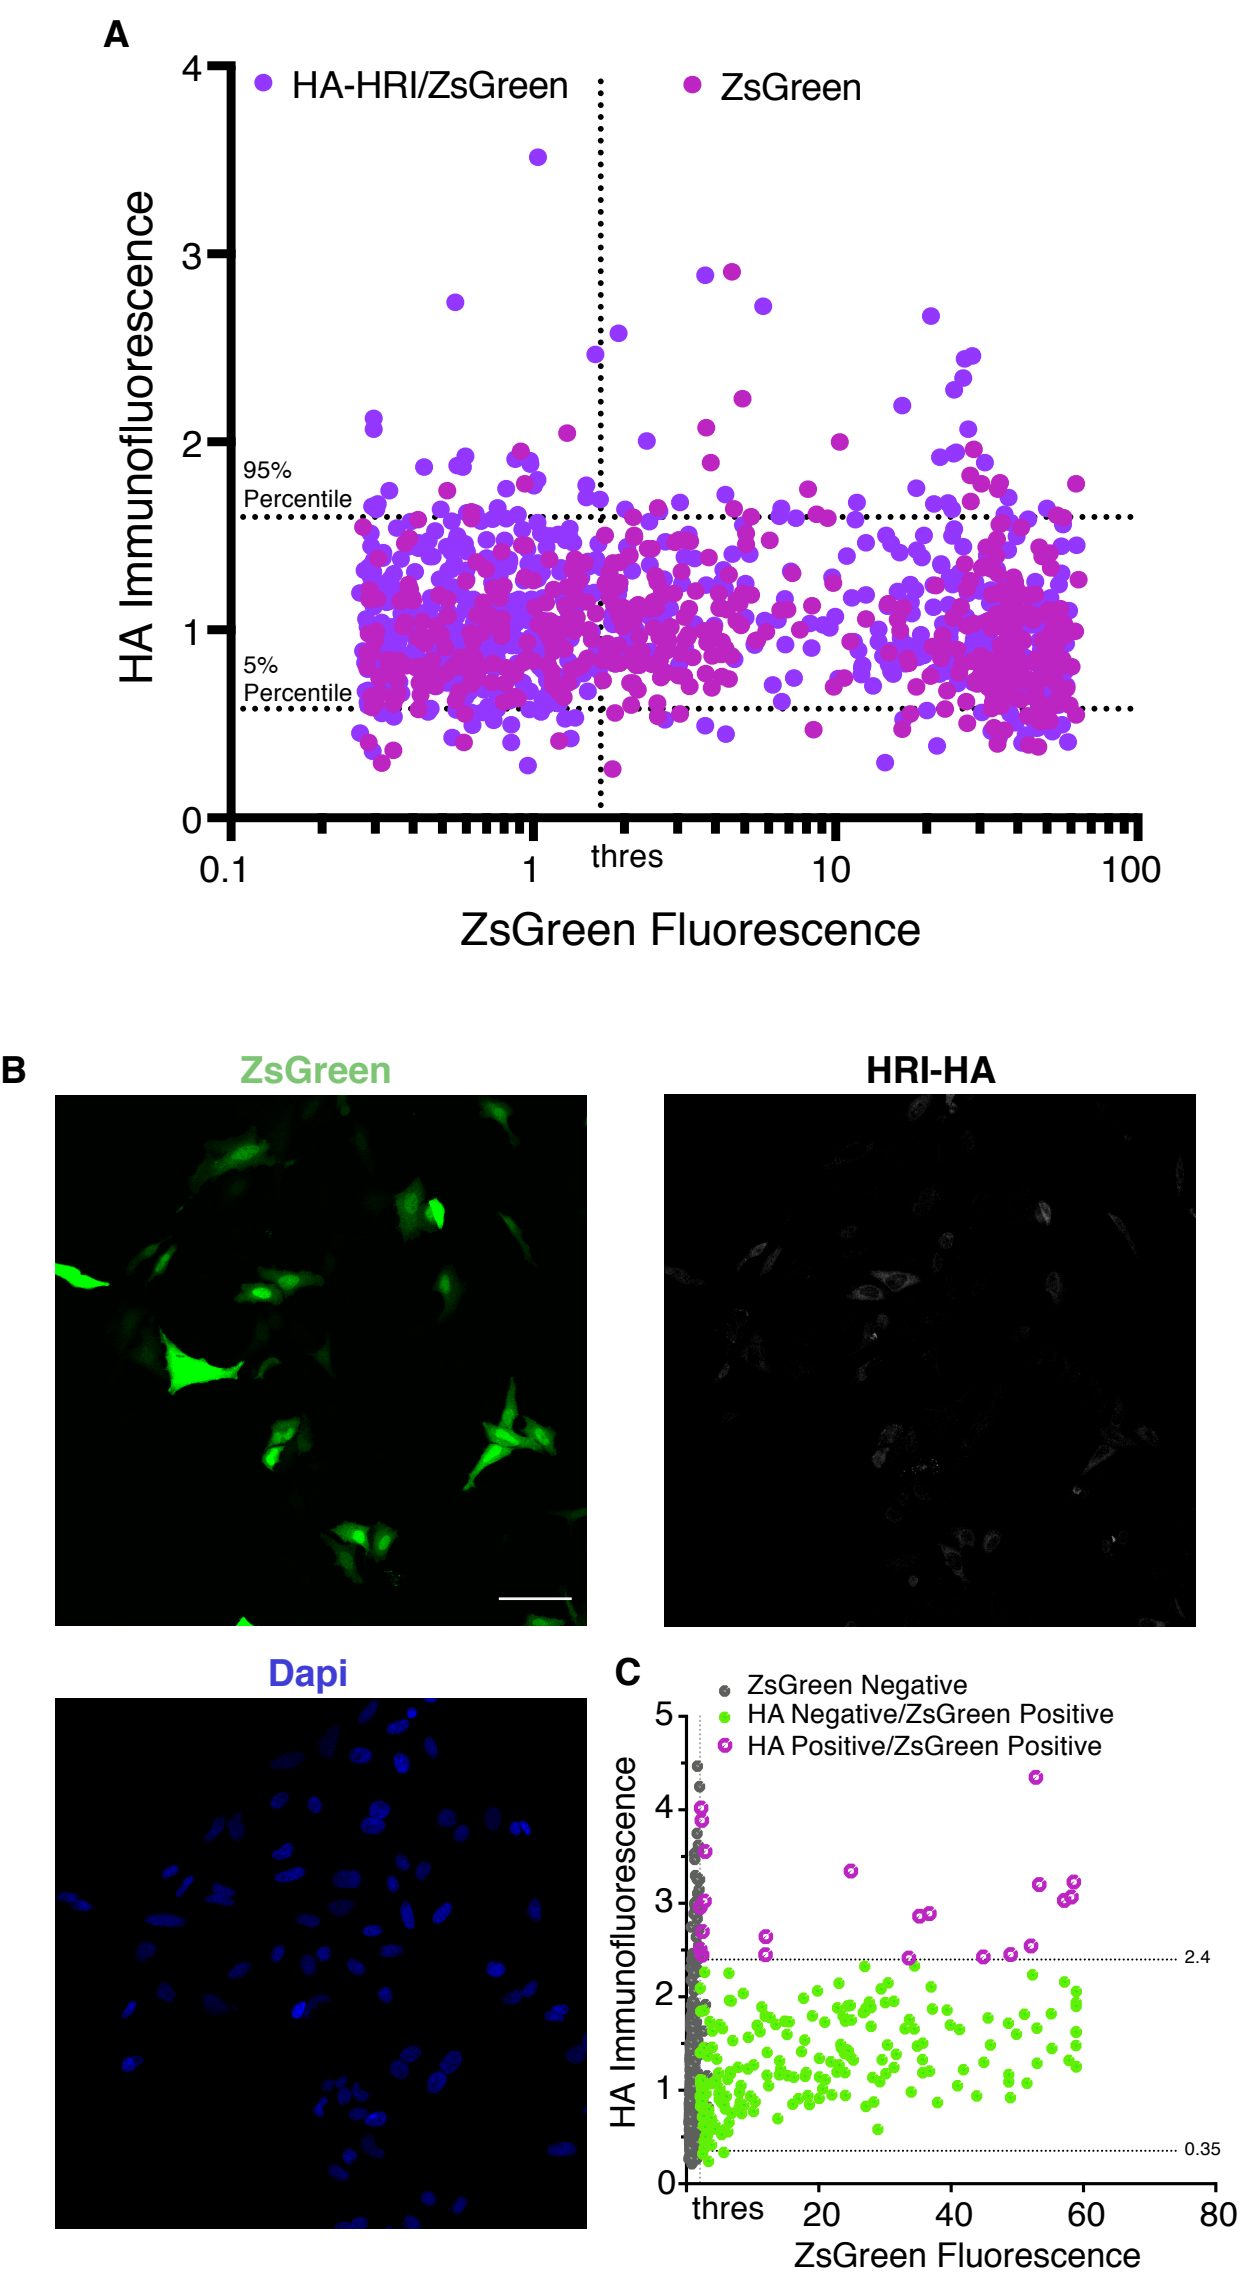

Supplement: supp [file elife-52714-supp-v1.zip]

Figure 3 Supplement 2

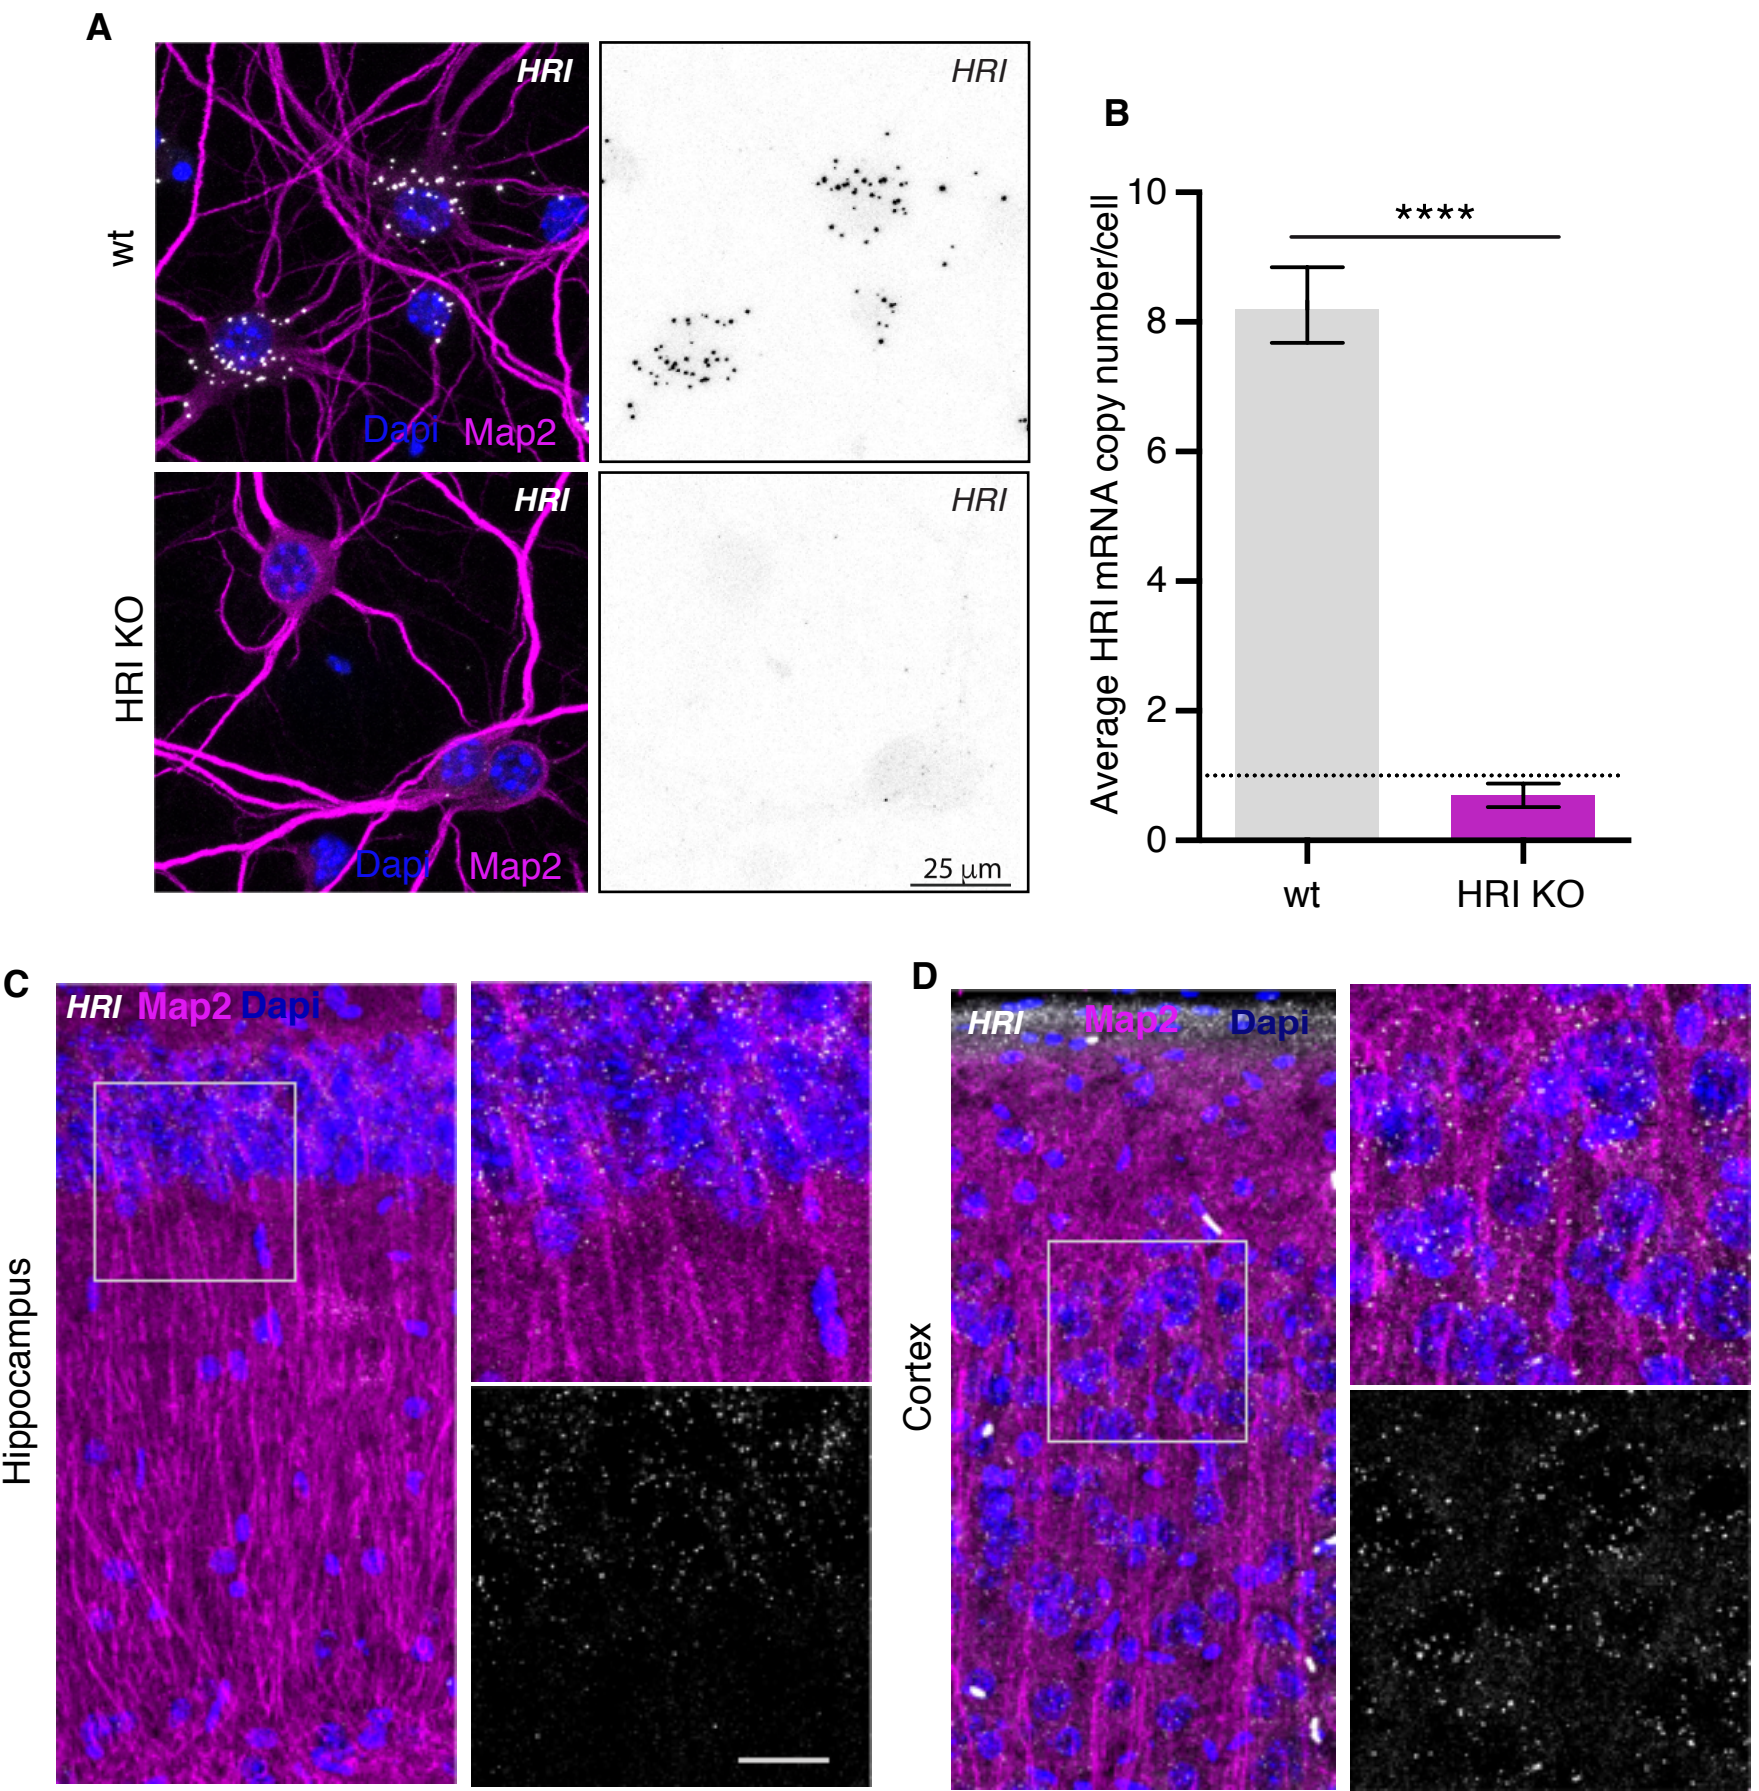

Supplement: supp [file elife-52714-supp-v1.zip]

Figure 2 Supplement 1

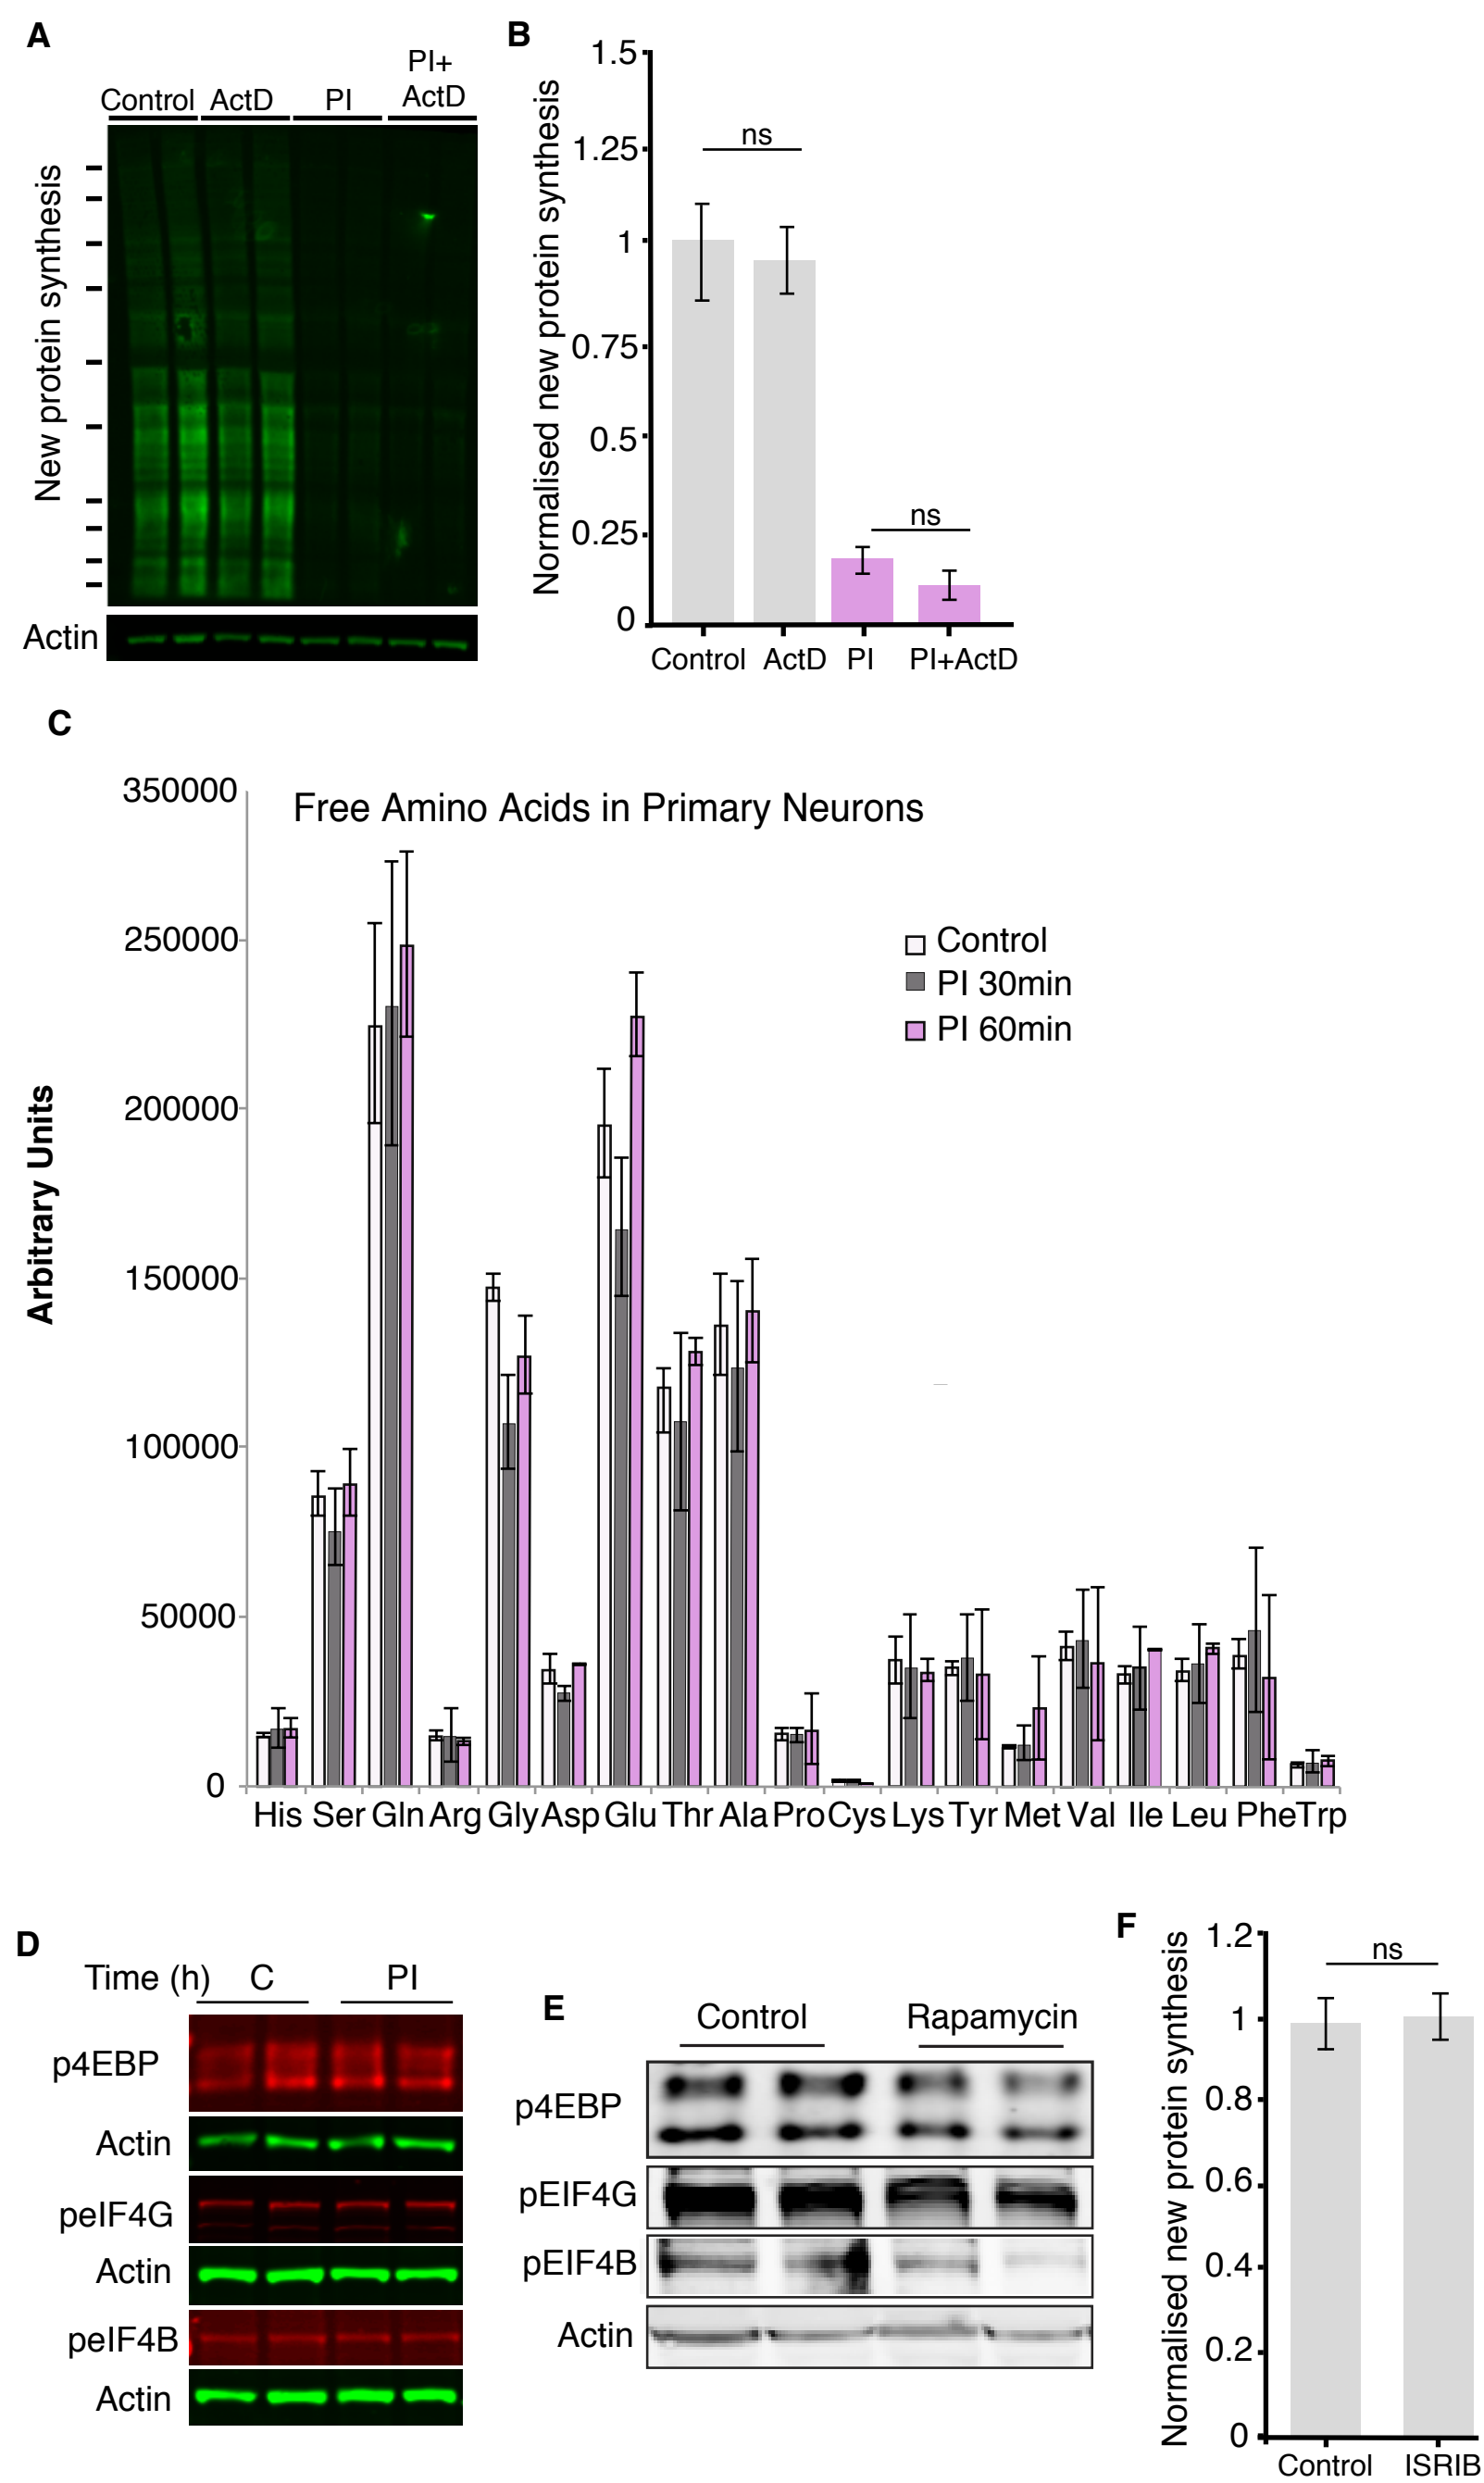

Supplement: supp [file elife-52714-supp-v1.zip]
